# Supplementary material
Source: PubMed Central journal article supplement (PMC3042133)
Supplement: NIHMS268110-supplement-1_si_001.pdf [file NIHMS268110-supplement-1_si_001.pdf]

**The Aggregation of Capped Hexaglycine Strands into Hydrogen-Bonding Motifs  
Representative of Pleated and Rippled  $\beta$ -Sheets, Collagen, and Polyglycine I and II Crystal  
Structures. A Density Functional Theory (DFT) Study.**

Joshua A. Plumley, Midas (I-Hsien) Tsai and J. J. Dannenberg\*

Department of Chemistry

City University of New York - Hunter College and the Graduate School

695 Park Avenue, New York NY 10065

[jdannenberg@gc.cuny.edu](mailto:jdannenberg@gc.cuny.edu)

**Supplementary Information**

|                                           |     |
|-------------------------------------------|-----|
| Figures of 3 strand structures            | S2  |
| Additional figures of 7 strand structures | S8  |
| Cartesian Coordinates for all structures  | S10 |

Figures for 3 strand structures

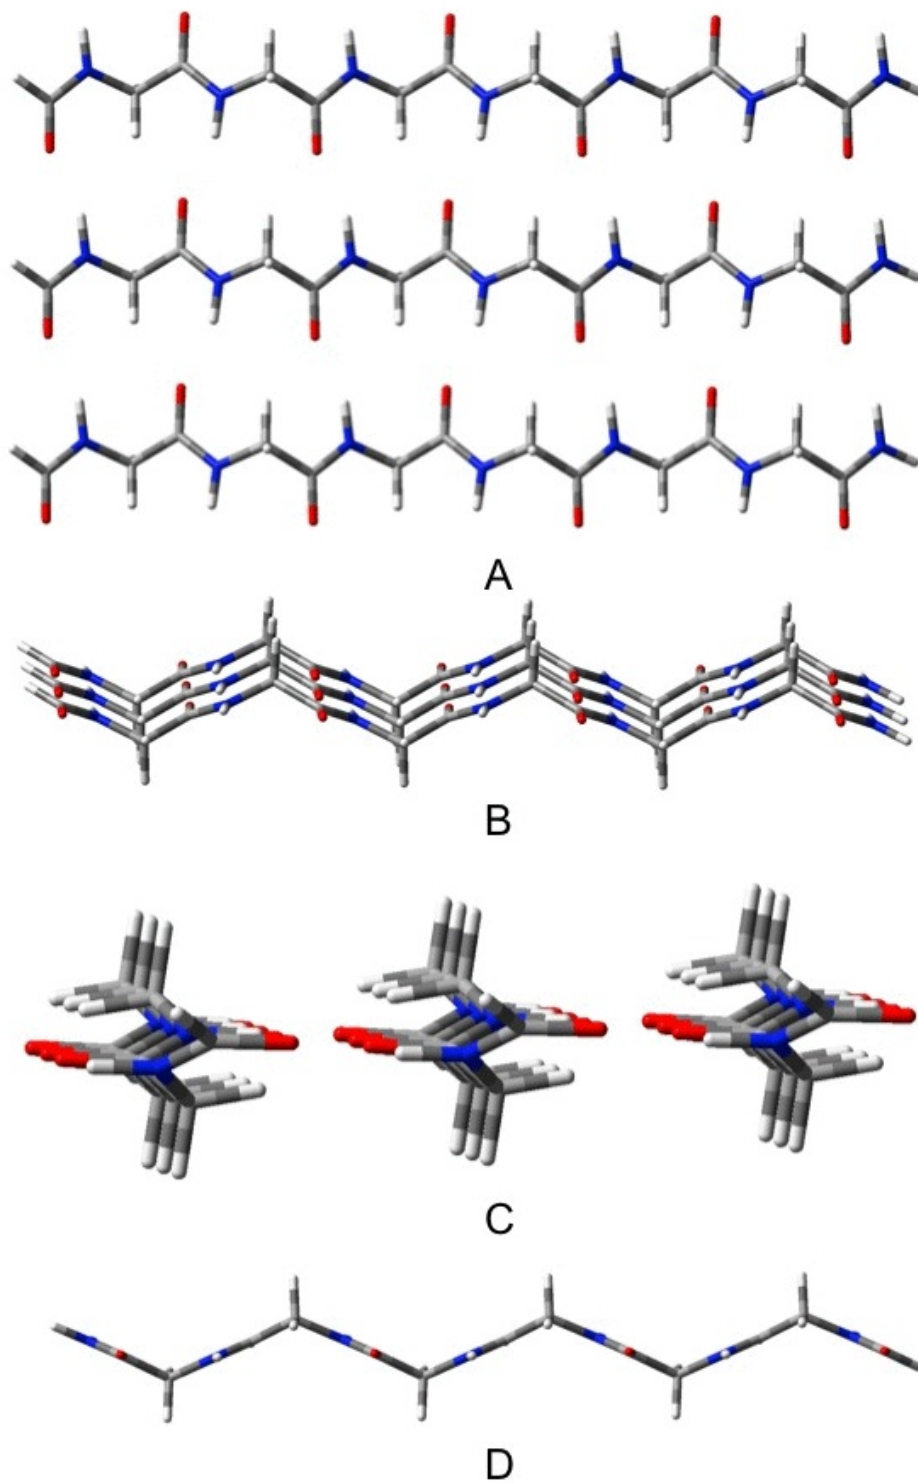

**Figure S1.** 3 strand parallel beta sheet with strands equivalent.

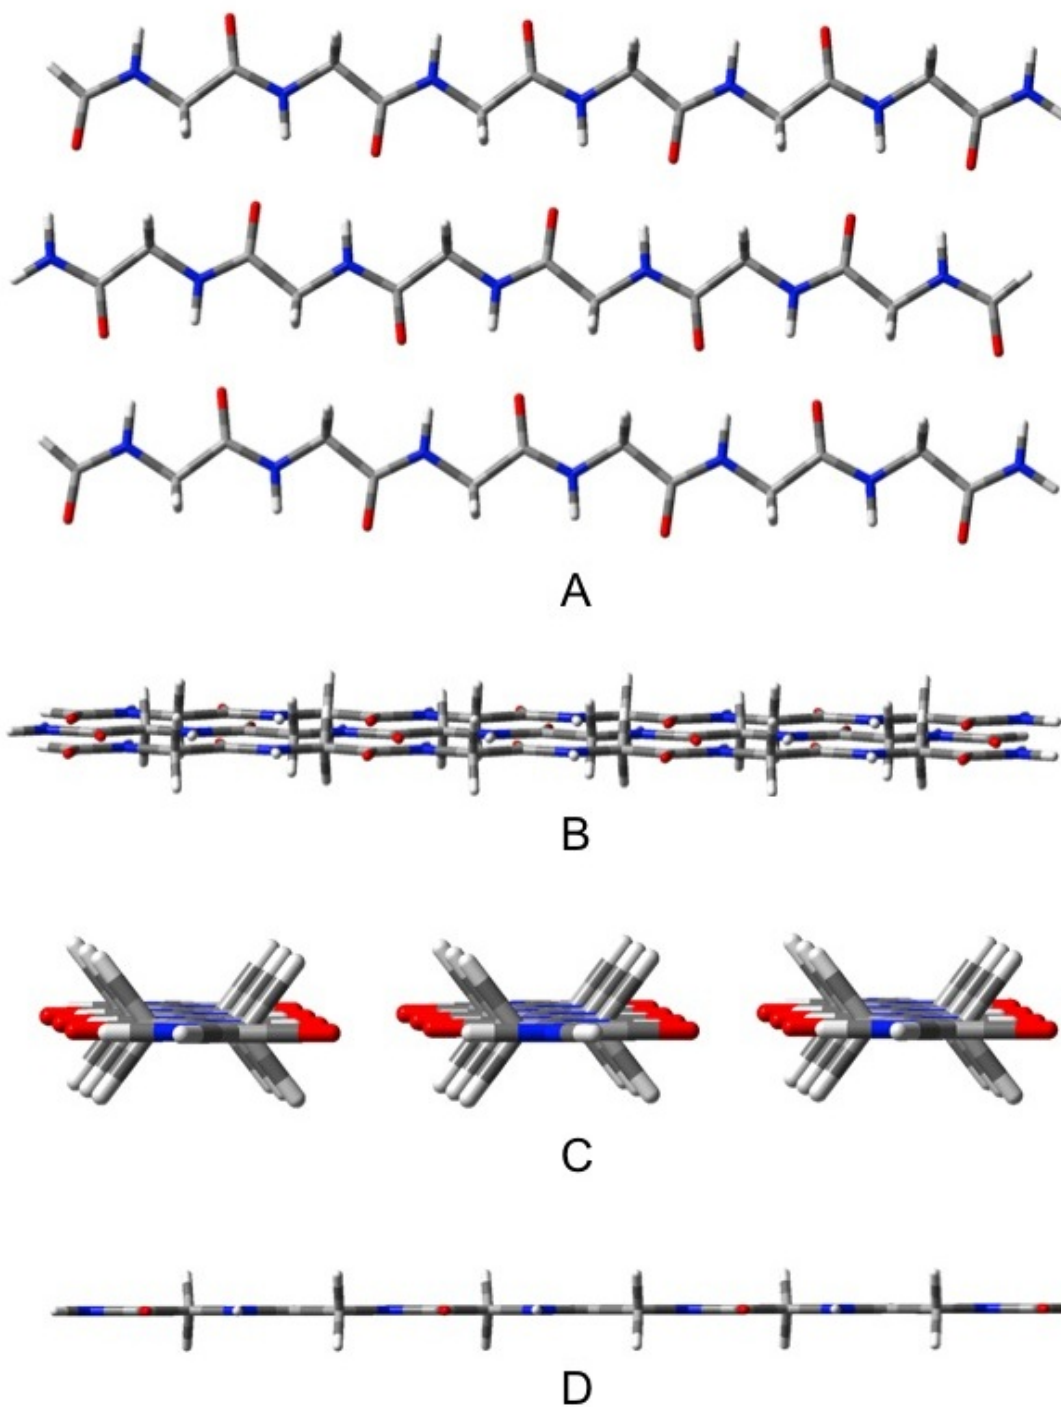

**Figure S2.** 3 strand anti parallel sheet with strands equivalent.

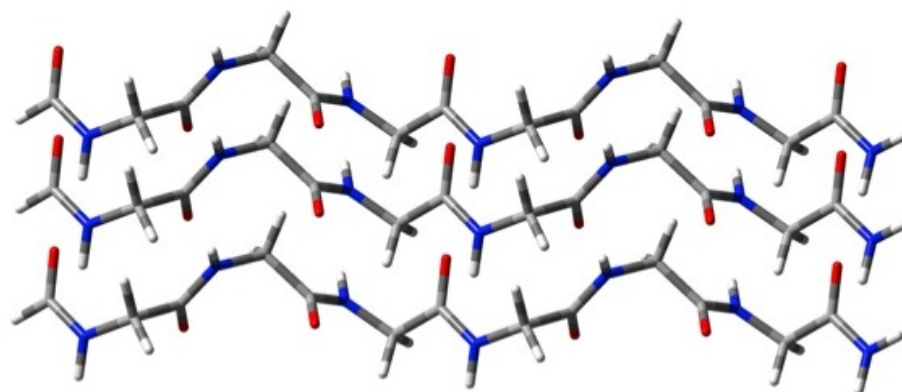

A

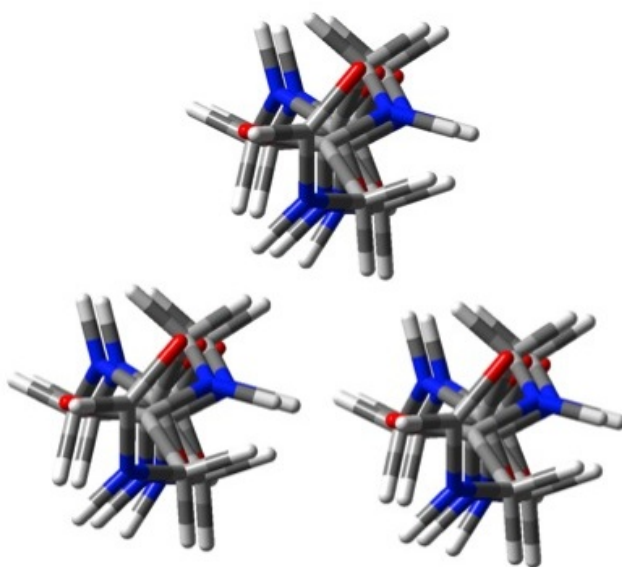

B

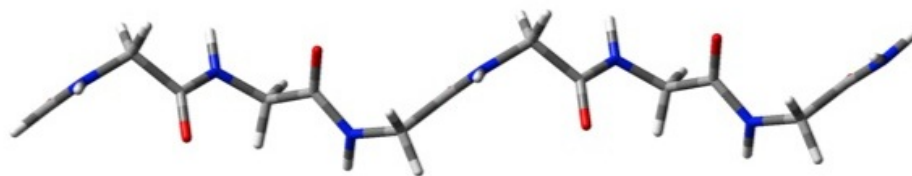

C

**Figure S3.** 3 strand polyglycine II

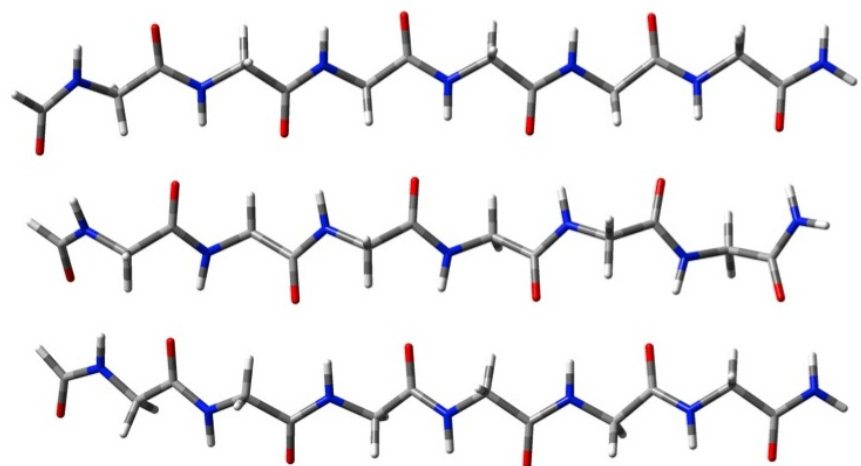

A

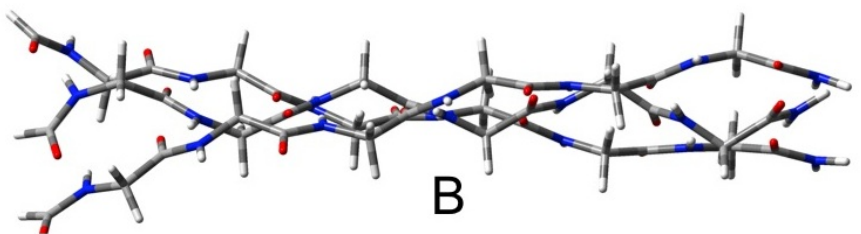

B

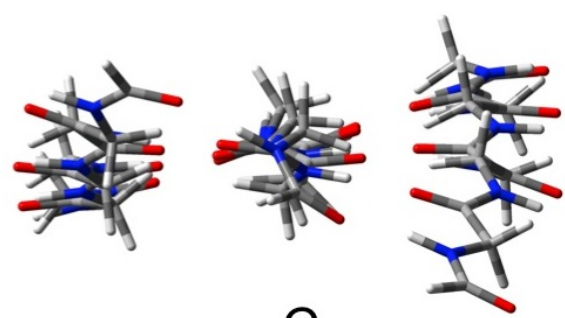

C

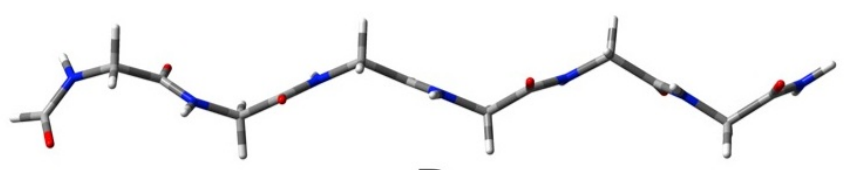

D

Figure S4. 3 strand anti parallel rippled sheet.

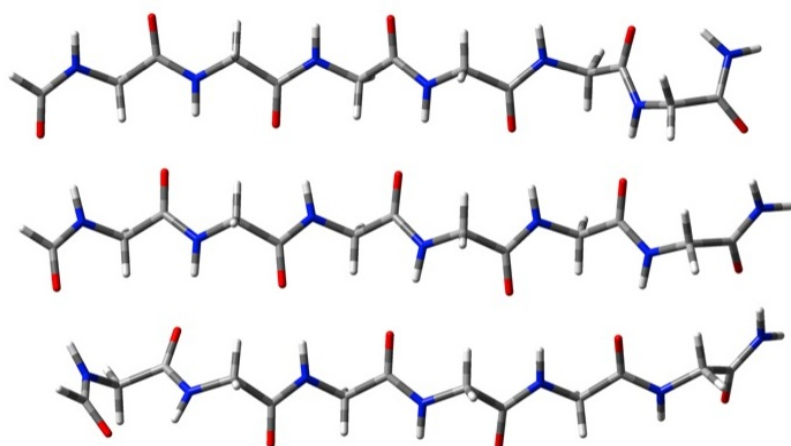

A

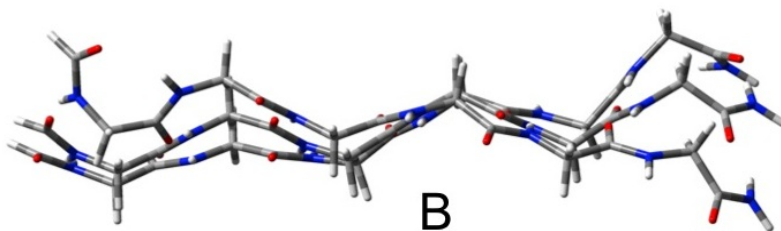

B

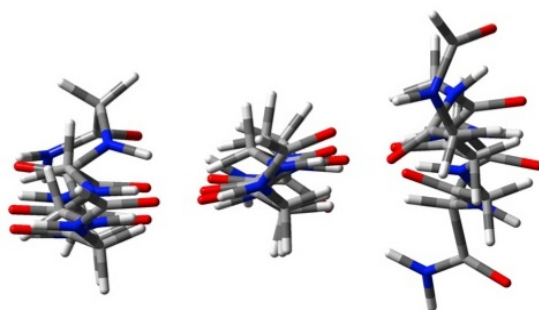

C

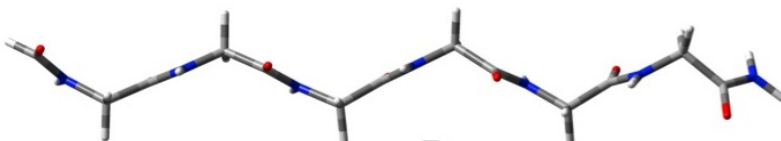

D

**Figure S5.** 3 strand parallel pleated sheet.

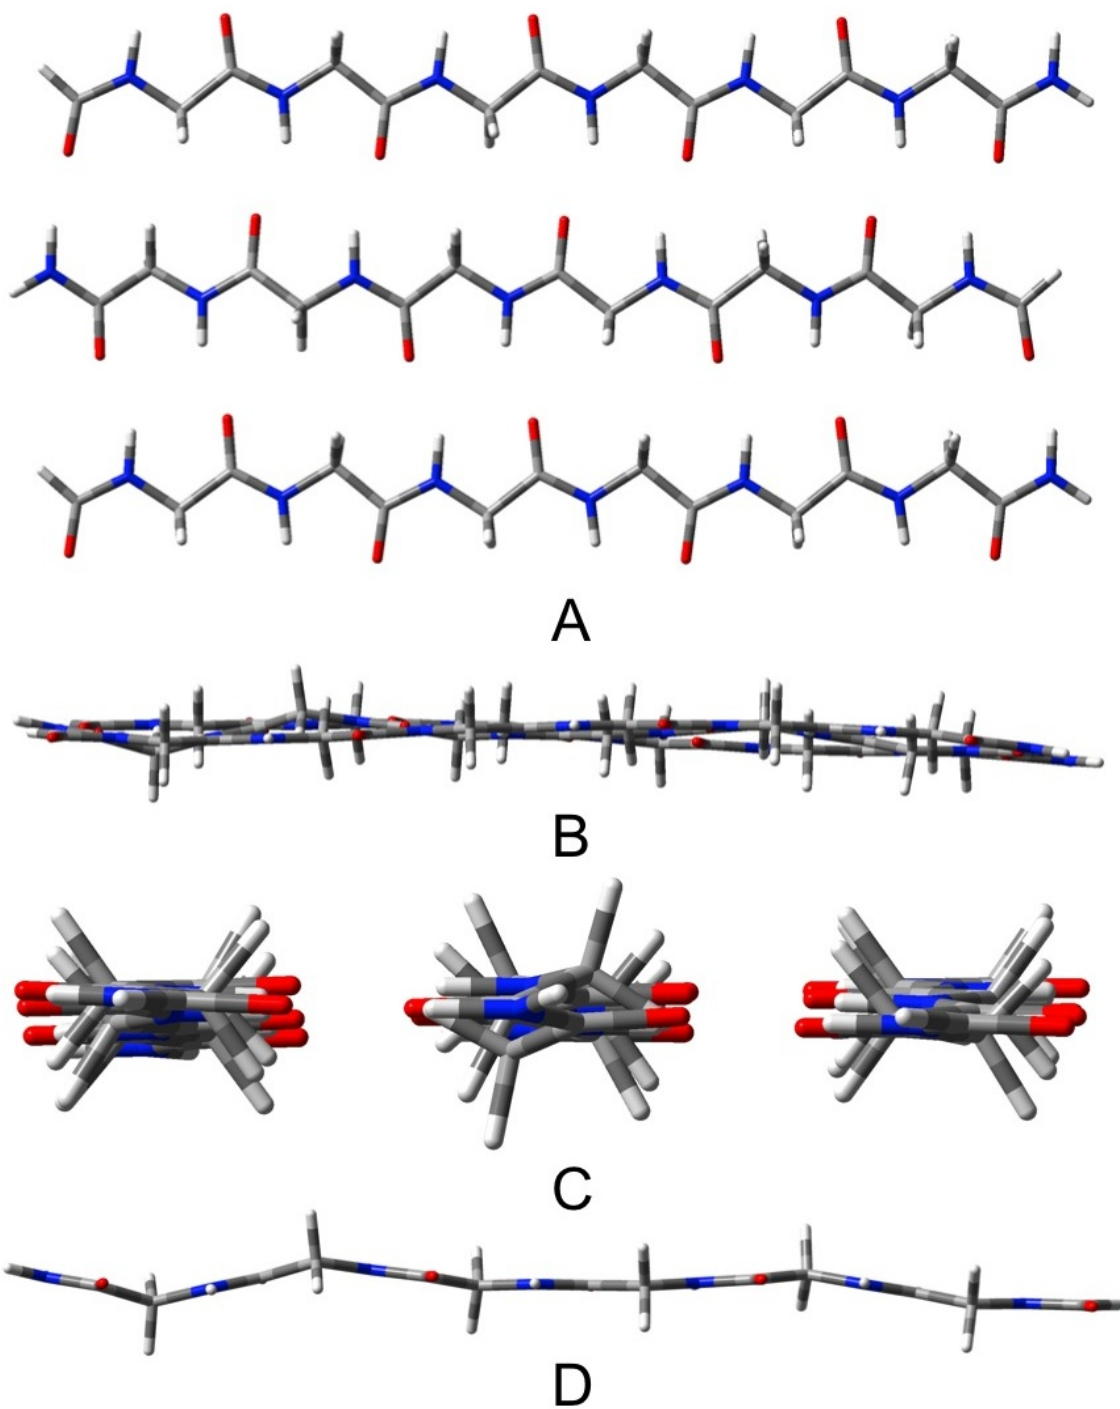

**Figure S6.** 3 strand anti parallel sheet.



Additional figures of 7 strand structures

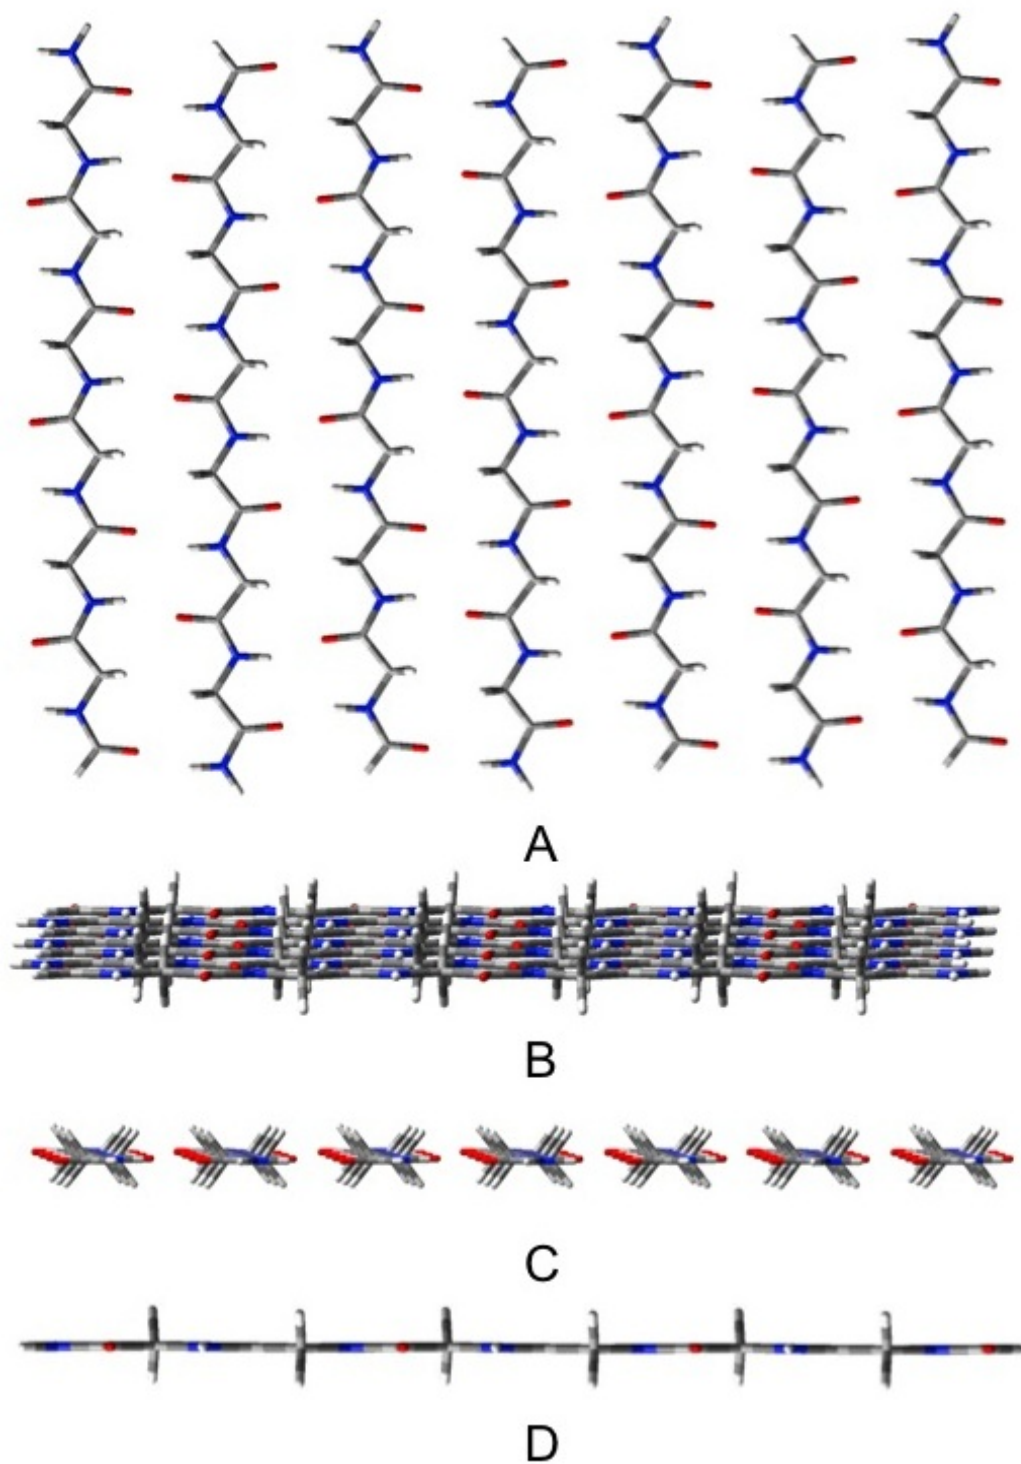

Figure S7. 7 strand anti parallel sheet with strands equivalent



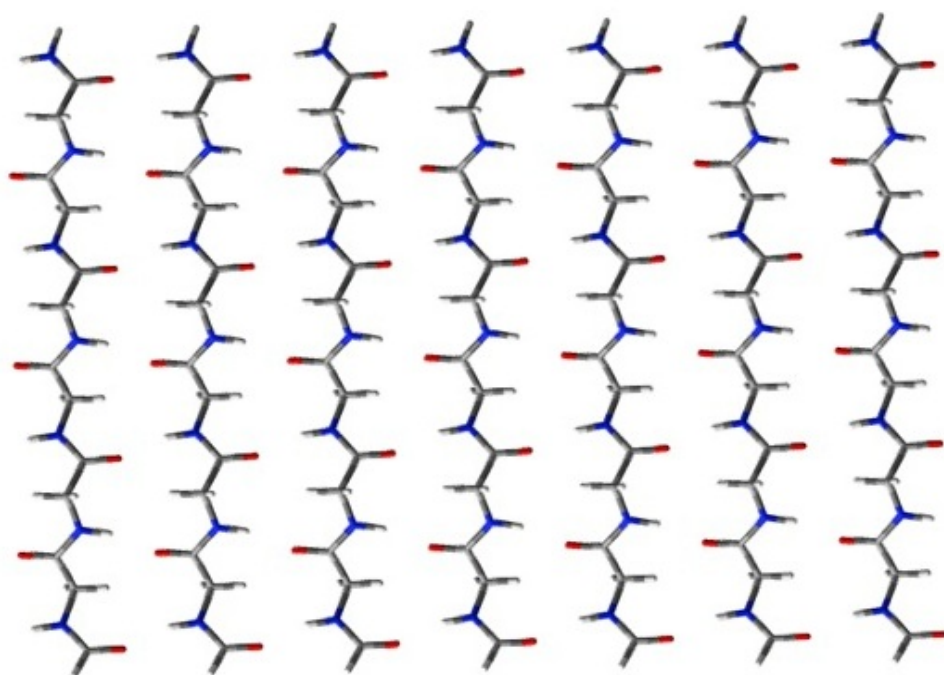

A

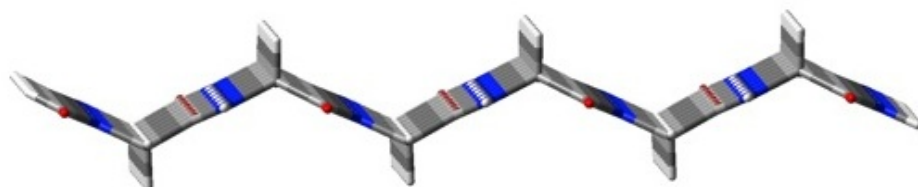

B

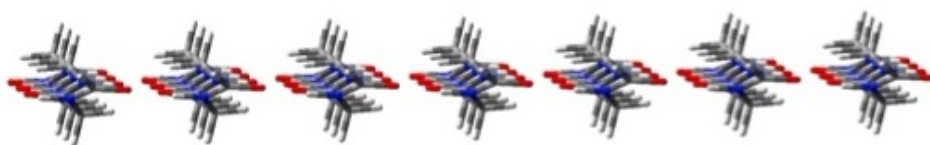

C

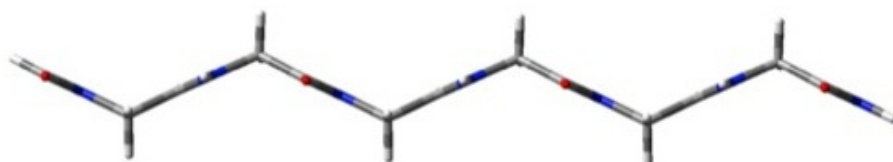

D

**Figure S8.** 7 strand parallel sheet with strands equivalent.

## I - Cartesian Coordinates

7 strand anti parallel rippled sheet

|   |              |              |             |
|---|--------------|--------------|-------------|
| O | -15.99268000 | -6.80552300  | -0.37479100 |
| C | -14.76313800 | -6.92928500  | -0.33283400 |
| C | -13.83764000 | -5.72019600  | -0.20038400 |
| N | -14.12101000 | -8.11962300  | -0.39815700 |
| N | -14.63916700 | -4.51470900  | -0.15693900 |
| H | -13.22712800 | -5.82267800  | 0.70385600  |
| H | -13.13617900 | -5.70067500  | -1.04094200 |
| H | -13.09942500 | -8.15845100  | -0.35999600 |
| C | -14.87459100 | -9.34480800  | -0.52446000 |
| H | -15.64575700 | -4.65013800  | -0.21339200 |
| C | -14.05973300 | -3.30239600  | -0.04923000 |
| C | -13.93422900 | -10.54814100 | -0.59463200 |
| H | -15.50680500 | -9.32430400  | -1.42336500 |
| H | -15.55617500 | -9.47583100  | 0.32854000  |
| C | -15.01275700 | -2.10680900  | -0.00842100 |
| O | -12.83038400 | -3.15868100  | 0.01577600  |
| O | -12.71304400 | -10.45034800 | -0.48267900 |
| N | -14.55929100 | -11.74376800 | -0.78564400 |
| N | -14.24308800 | -0.88294500  | 0.03298600  |
| H | -15.67151300 | -2.12698000  | -0.88725000 |
| H | -15.66593600 | -2.19152800  | 0.87148900  |
| H | -15.56171800 | -11.81717900 | -0.88299000 |
| C | -14.84858300 | 0.32521800   | 0.04718200  |
| H | -13.22268900 | -0.95124000  | 0.04516800  |
| C | -13.88021300 | 1.50903800   | 0.09270300  |
| O | -16.07394000 | 0.49177700   | 0.02644700  |
| N | -14.64394100 | 2.73991700   | 0.08410100  |
| H | -13.25375300 | 1.43840900   | 0.98914000  |
| H | -13.19716400 | 1.45939400   | -0.76174800 |
| C | -14.03010100 | 3.93817000   | 0.12287500  |
| H | -15.65493000 | 2.62833000   | 0.05120600  |
| C | -14.94839900 | 5.16131900   | 0.12397700  |
| O | -12.79612100 | 4.05101800   | 0.16183300  |
| N | -14.14815000 | 6.36427000   | 0.03810100  |
| H | -15.65323800 | 5.10108900   | -0.71582700 |
| H | -15.55583500 | 5.15620700   | 1.04026200  |
| C | -14.72793900 | 7.58212100   | -0.02671700 |
| H | -13.12885500 | 6.27441100   | 0.04470700  |
| C | -13.74141800 | 8.75192100   | -0.11930500 |

|   |              |             |             |
|---|--------------|-------------|-------------|
| O | -15.95037700 | 7.77300700  | -0.01963900 |
| N | -14.49946900 | 9.98687800  | -0.14614100 |
| H | -13.05289900 | 8.72871700  | 0.73192800  |
| H | -13.12570900 | 8.64247500  | -1.01919100 |
| C | -13.91223600 | 11.19504000 | -0.16778300 |
| H | -15.51124300 | 9.87461100  | -0.13086200 |
| O | -12.68903300 | 11.38182900 | -0.17618200 |
| O | -11.33151500 | -0.19631200 | 0.03834500  |
| C | -10.10139900 | -0.13652100 | 0.19527300  |
| C | -9.30426100  | -1.34840800 | 0.67893100  |
| N | -9.37320800  | 0.98662600  | 0.01991300  |
| N | -9.93110800  | -2.58470000 | 0.24167600  |
| H | -8.27409600  | -1.30521000 | 0.32382400  |
| H | -9.27029300  | -1.29580900 | 1.77799400  |
| H | -8.35172700  | 0.94007000  | 0.06764300  |
| C | -9.99545100  | 2.24071800  | -0.36773100 |
| C | -9.20864000  | -3.70046800 | 0.01439200  |
| H | -10.94886100 | -2.60816900 | 0.15817600  |
| O | -6.54972500  | 0.20490200  | 0.05538000  |
| C | -9.18815700  | 3.43449500  | 0.14600600  |
| H | -11.02115700 | 2.27472200  | 0.00169400  |
| H | -10.04375800 | 2.33294500  | -1.46395000 |
| C | -10.00889000 | -4.88890100 | -0.52113200 |
| O | -7.97903000  | -3.77054700 | 0.16927200  |
| C | -5.31752000  | 0.16667100  | 0.21515000  |
| O | -7.95731100  | 3.36298700  | 0.29267300  |
| N | -9.90954100  | 4.55355800  | 0.36332600  |
| N | -9.35656900  | -6.14481700 | -0.19216000 |
| H | -11.02579500 | -4.88125200 | -0.12676900 |
| H | -10.08667600 | -4.76077000 | -1.61196200 |
| C | -4.56050200  | 1.36009800  | 0.79984000  |
| N | -4.55837000  | -0.91798500 | -0.04389900 |
| H | -10.92746900 | 4.52600100  | 0.28016200  |
| C | -9.28723200  | 5.80017100  | 0.77663200  |
| C | -10.05534000 | -7.29308000 | -0.08907400 |
| H | -8.33402500  | -6.16748900 | -0.13369600 |
| N | -5.13590300  | 2.61473200  | 0.34475700  |
| H | -4.63170500  | 1.27544800  | 1.89509800  |
| H | -3.50298100  | 1.32749300  | 0.53571000  |
| H | -3.53873600  | -0.84396100 | 0.01588400  |
| C | -5.13954400  | -2.15816200 | -0.53009800 |
| C | -10.02393200 | 6.99990400  | 0.17796300  |
| H | -8.23529200  | 5.80062000  | 0.49039200  |

|   |              |              |             |
|---|--------------|--------------|-------------|
| H | -9.32978800  | 5.91160400   | 1.87096800  |
| C | -9.23619000  | -8.51455300  | 0.32736000  |
| O | -11.28357400 | -7.37381200  | -0.26223900 |
| C | -4.36795800  | 3.69327700   | 0.08527700  |
| H | -6.15414900  | 2.69755400   | 0.29701700  |
| C | -4.38873400  | -3.37108400  | 0.02290500  |
| H | -5.07058500  | -2.21554600  | -1.62731200 |
| H | -6.19669700  | -2.19289400  | -0.26540200 |
| O | -11.25168600 | 6.97338000   | -0.00472100 |
| N | -9.24830100  | 8.07713900   | -0.06849400 |
| N | -9.87703500  | -9.73405700  | -0.13158100 |
| H | -8.21907800  | -8.45172500  | -0.06175400 |
| H | -9.16126500  | -8.50036400  | 1.42553800  |
| C | -5.11876000  | 4.90353000   | -0.47125900 |
| O | -3.13405200  | 3.71344100   | 0.22416000  |
| O | -3.15656200  | -3.34680500  | 0.17483200  |
| N | -5.15788200  | -4.45345800  | 0.26424400  |
| H | -8.23129500  | 7.99432400   | 0.01806500  |
| C | -9.80764300  | 9.31753000   | -0.57230400 |
| C | -9.18403500  | -10.85073000 | -0.41424500 |
| H | -10.89256400 | -9.75180000  | -0.22548900 |
| N | -4.51630800  | 6.14502600   | -0.01540700 |
| H | -5.07188700  | 4.82892100   | -1.56862300 |
| H | -6.17090700  | 4.88165000   | -0.18594400 |
| H | -6.17500700  | -4.37184800  | 0.19854000  |
| C | -4.59230200  | -5.71436500  | 0.71404600  |
| C | -9.07837200  | 10.53790600  | -0.00227700 |
| H | -10.87224600 | 9.35432200   | -0.33957000 |
| H | -9.71032300  | 9.37558700   | -1.66756200 |
| O | -7.95450000  | -10.97490700 | -0.32889800 |
| C | -5.26078300  | 7.23978700   | 0.23697900  |
| H | -3.49505400  | 6.20969800   | 0.03238000  |
| C | -5.30118300  | -6.90058100  | 0.05579200  |
| H | -4.72341700  | -5.83080300  | 1.80066300  |
| H | -3.52182100  | -5.72583200  | 0.50717300  |
| O | -7.86983900  | 10.51057900  | 0.26301400  |
| N | -9.84846400  | 11.64174900  | 0.12197000  |
| C | -4.48818500  | 8.43817700   | 0.78933500  |
| O | -6.49530400  | 7.28293900   | 0.09620700  |
| O | -6.52793300  | -6.88166900  | -0.14653700 |
| N | -4.50664200  | -7.95493300  | -0.21988600 |
| H | -10.86130800 | 11.61393700  | -0.00634300 |
| N | -5.11932100  | 9.68702900   | 0.40228700  |

|   |              |              |             |
|---|--------------|--------------|-------------|
| H | -4.47622500  | 8.33163500   | 1.88515100  |
| H | -3.45138500  | 8.42807600   | 0.45082200  |
| H | -3.49317300  | -7.86075300  | -0.10364200 |
| C | -5.02974700  | -9.19010800  | -0.77525800 |
| H | -6.14048000  | 9.75071400   | 0.37415300  |
| C | -4.41148100  | 10.79340000  | 0.11582900  |
| C | -4.36034900  | -10.41727100 | -0.14642600 |
| H | -4.83118900  | -9.24375900  | -1.85649900 |
| H | -6.11107600  | -9.21936200  | -0.63762100 |
| O | -3.17464800  | 10.88354000  | 0.12799800  |
| O | -3.15865000  | -10.42386600 | 0.15027800  |
| N | -5.17135400  | -11.48967200 | -0.00852300 |
| H | -6.18149500  | -11.41915700 | -0.14480900 |
| H | -4.76898600  | -12.33663500 | 0.37142800  |
| H | -9.40581000  | 12.48947900  | 0.45193700  |
| H | -13.99750600 | -12.58331700 | -0.82765800 |
| H | -14.62966100 | 12.03437700  | -0.17791400 |
| H | -9.83068900  | -11.68090600 | -0.74649800 |
| H | -5.05434300  | 11.65069900  | -0.14579900 |
| O | -1.75599200  | -0.16235400  | 0.04277000  |
| C | -0.51973200  | -0.13725800  | 0.17303200  |
| C | 0.23647600   | -1.34170000  | 0.73484400  |
| N | 0.24541700   | 0.93766200   | -0.10260900 |
| N | -0.34719900  | -2.58601700  | 0.26135400  |
| H | 1.29275400   | -1.30958600  | 0.46576100  |
| H | 0.17020200   | -1.27527300  | 1.83160500  |
| H | 1.26494200   | 0.85534200   | -0.05555400 |
| C | -0.33048600  | 2.18949700   | -0.56569700 |
| C | 0.41363700   | -3.66567900  | -0.01019600 |
| H | -1.36615800  | -2.66129100  | 0.20797900  |
| O | 3.05214700   | 0.17954300   | -0.05039500 |
| C | 0.42745800   | 3.38480900   | 0.01528800  |
| H | -1.38818500  | 2.22160900   | -0.30316300 |
| H | -0.25518900  | 2.26774200   | -1.66101500 |
| C | -0.34213700  | -4.86582300  | -0.58191100 |
| O | 1.64734700   | -3.69616600  | 0.13132300  |
| C | 4.29030300   | 0.15040200   | 0.05385000  |
| O | 1.66230900   | 3.35457200   | 0.14633200  |
| N | -0.33615600  | 4.45726700   | 0.30745400  |
| N | 0.23957400   | -6.11340700  | -0.11540500 |
| H | -1.39900400  | -4.83450300  | -0.31579700 |
| H | -0.27205100  | -4.79212700  | -1.67797000 |
| C | 5.06737200   | 1.35518700   | 0.58598000  |

|   |             |              |             |
|---|-------------|--------------|-------------|
| N | 5.04426600  | -0.93276500  | -0.22530400 |
| H | -1.35481500 | 4.37755400   | 0.25410200  |
| C | 0.23947900  | 5.69985100   | 0.79467100  |
| C | -0.52197700 | -7.19026800  | 0.15845100  |
| H | 1.25949800  | -6.19214800  | -0.06327900 |
| N | 4.46743500  | 2.60171300   | 0.14075100  |
| H | 5.04952400  | 1.28497600   | 1.68456500  |
| H | 6.11142900  | 1.32031900   | 0.27313400  |
| H | 6.06442300  | -0.85713200  | -0.19811100 |
| C | 4.45264900  | -2.18616500  | -0.66196100 |
| C | -0.49516500 | 6.90769500   | 0.20973700  |
| H | 1.30297100  | 5.72597200   | 0.55590200  |
| H | 0.14099700  | 5.76827200   | 1.88879700  |
| C | 0.23362700  | -8.39394800  | 0.72277600  |
| O | -1.75797600 | -7.21538600  | 0.02577700  |
| C | 5.21765300  | 3.69225800   | -0.12277000 |
| H | 3.44699100  | 2.67441700   | 0.11639500  |
| C | 5.20495300  | -3.38232100  | -0.07455200 |
| H | 4.51201400  | -2.28122000  | -1.75701900 |
| H | 3.39796900  | -2.20526800  | -0.38612600 |
| O | -1.72820900 | 6.88971300   | 0.05073700  |
| N | 0.28357900  | 7.97567500   | -0.05391200 |
| N | -0.40735900 | -9.63728200  | 0.33341400  |
| H | 1.27373100  | -8.39620600  | 0.39438900  |
| H | 0.23518600  | -8.28373100  | 1.81828100  |
| C | 4.44373300  | 4.89779100   | -0.65953300 |
| O | 6.45327100  | 3.72736400   | -0.00249500 |
| O | 6.43853000  | -3.35541800  | 0.06810700  |
| N | 4.43602000  | -4.45518200  | 0.20636200  |
| H | 1.30049900  | 7.88369900   | 0.02508200  |
| C | -0.26641200 | 9.22839800   | -0.54078100 |
| C | 0.29043000  | -10.75388800 | 0.06385400  |
| H | -1.42911200 | -9.68758100  | 0.28882900  |
| N | 5.03881200  | 6.14233800   | -0.20320000 |
| H | 4.47713400  | 4.83261300   | -1.75783700 |
| H | 3.39634400  | 4.86349500   | -0.35857400 |
| H | 3.41754500  | -4.37019700  | 0.15322500  |
| C | 5.00428100  | -5.69927000  | 0.69728400  |
| C | 0.41105300  | 10.43238500  | 0.12298900  |
| H | -1.34394000 | 9.24003800   | -0.37289400 |
| H | -0.09652600 | 9.33001300   | -1.62337100 |
| O | 1.52580500  | -10.86031000 | 0.09567600  |
| C | 4.28548300  | 7.20732800   | 0.13538500  |

|   |             |              |             |
|---|-------------|--------------|-------------|
| H | 6.05912100  | 6.22828100   | -0.20412200 |
| C | 4.25372200  | -6.90643100  | 0.13110500  |
| H | 4.91942100  | -5.75885400  | 1.79322300  |
| H | 6.06467000  | -5.73912600  | 0.44713600  |
| O | 1.62298300  | 10.43874300  | 0.37716700  |
| N | -0.40645600 | 11.48606000  | 0.34048000  |
| C | 5.06525200  | 8.40184300   | 0.68515100  |
| O | 3.04418100  | 7.22635800   | 0.07013900  |
| O | 3.02124900  | -6.87745000  | -0.02716800 |
| N | 5.01996800  | -7.98785800  | -0.11626800 |
| H | -1.42115000 | 11.40349900  | 0.24418600  |
| N | 4.38082600  | 9.64854300   | 0.39472600  |
| H | 5.15668500  | 8.25001600   | 1.77193600  |
| H | 6.07655500  | 8.43007100   | 0.27721700  |
| H | 6.03710600  | -7.90934900  | -0.03572600 |
| C | 4.45594300  | -9.24362800  | -0.57814500 |
| H | 3.35753800  | 9.68056400   | 0.40449000  |
| C | 5.04313800  | 10.79387700  | 0.15449600  |
| C | 5.11682100  | -10.44193200 | 0.11276400  |
| H | 4.62699400  | -9.37022900  | -1.65790600 |
| H | 3.37789800  | -9.23849700  | -0.41306900 |
| O | 6.27613700  | 10.92413400  | 0.13313200  |
| O | 6.32656600  | -10.45560600 | 0.37664800  |
| N | 4.28642400  | -11.48322300 | 0.34231400  |
| H | 3.27339800  | -11.39165400 | 0.23662300  |
| H | 4.67912700  | -12.31084800 | 0.77173000  |
| H | -0.00146400 | 12.31720600  | 0.75140600  |
| H | -0.35939100 | -11.60421100 | -0.20346300 |
| H | 4.36431100  | 11.64263500  | -0.03378700 |
| O | 7.87395600  | -0.22839500  | -0.22676300 |
| C | 9.10984000  | -0.16135600  | -0.11646800 |
| C | 9.92676900  | -1.35720700  | 0.37446600  |
| N | 9.82436200  | 0.95615400   | -0.35730300 |
| N | 9.27747000  | -2.60705500  | 0.01869900  |
| H | 10.93832800 | -1.33349300  | -0.03350400 |
| H | 10.01840700 | -1.25845200  | 1.46737800  |
| H | 10.84497000 | 0.93162200   | -0.31114400 |
| C | 9.18248900  | 2.19755700   | -0.75622600 |
| C | 9.98596300  | -3.74257400  | -0.16013500 |
| H | 8.25509500  | -2.63883700  | -0.00164600 |
| O | 12.74353100 | 0.38503200   | -0.25504800 |
| C | 9.99459600  | 3.40427800   | -0.28428700 |
| H | 8.16531700  | 2.23406600   | -0.36526100 |



|   |             |              |             |
|---|-------------|--------------|-------------|
| H | 9.11130100  | 2.26432700   | -1.85274400 |
| C | 9.16229800  | -4.94944800  | -0.61170000 |
| O | 11.21777200 | -3.81617800  | -0.03112200 |
| C | 13.97648700 | 0.25079300   | -0.25807800 |
| O | 11.22789200 | 3.34135100   | -0.16514100 |
| N | 9.27251900  | 4.52619000   | -0.07714900 |
| N | 9.77900300  | -6.18849400  | -0.16973400 |
| H | 8.14005200  | -4.88732000  | -0.23751200 |
| H | 9.10921500  | -4.91049800  | -1.71064300 |
| C | 14.91826900 | 1.45597000   | -0.30317500 |
| N | 14.57208700 | -0.95728200  | -0.22236200 |
| H | 8.25080000  | 4.47870100   | -0.08864500 |
| C | 9.90474600  | 5.77876700   | 0.29996000  |
| C | 9.04463600  | -7.28114200  | 0.11809700  |
| H | 10.79910200 | -6.23378200  | -0.12359600 |
| N | 14.14014900 | 2.67471900   | -0.29367000 |
| H | 15.60391000 | 1.42003000   | 0.55456700  |
| H | 15.54517700 | 1.39612200   | -1.20384700 |
| H | 15.58185900 | -1.08355300  | -0.22603100 |
| C | 13.79128100 | -2.17616000  | -0.17801600 |
| C | 9.06931400  | 6.97270800   | -0.16512700 |
| H | 10.91409500 | 5.82607600   | -0.11023700 |
| H | 9.99811400  | 5.85836000   | 1.39424300  |
| C | 9.84480400  | -8.47476600  | 0.64025000  |
| O | 7.80711200  | -7.32574800  | 0.01989200  |
| C | 14.73544100 | 3.88910300   | -0.31646000 |
| H | 13.12121700 | 2.59846800   | -0.26133100 |
| C | 14.74242000 | -3.37545200  | -0.15046100 |
| H | 13.12779200 | -2.25223400  | -1.04677500 |
| H | 13.14239500 | -2.20045100  | 0.70381500  |
| O | 7.83272400  | 6.89081700   | -0.26559600 |
| N | 9.76948200  | 8.10107400   | -0.39359900 |
| N | 9.09735700  | -9.70833700  | 0.48488700  |
| H | 10.80414300 | -8.54433000  | 0.12439500  |
| H | 10.07068600 | -8.28020400  | 1.70016900  |
| C | 13.75419900 | 5.06247000   | -0.30392100 |
| O | 15.95905800 | 4.06440900   | -0.34576800 |
| O | 15.97022800 | -3.22919000  | -0.17455100 |
| N | 14.11581000 | -4.57153500  | -0.09811900 |
| H | 10.79160700 | 8.08198100   | -0.34953300 |
| C | 9.11852500  | 9.34659000   | -0.76061800 |
| C | 9.69971000  | -10.91053700 | 0.48409800  |
| H | 8.07552000  | -9.67988700  | 0.42674600  |

|   |             |              |             |
|---|-------------|--------------|-------------|
| N | 14.49568600 | 6.30588200   | -0.31303400 |
| H | 13.08888700 | 4.99351000   | -1.17217000 |
| H | 13.10960100 | 4.99128100   | 0.57863900  |
| H | 13.09445500 | -4.61944000  | -0.08310200 |
| C | 14.85443700 | -5.81528300  | -0.06786300 |
| C | 9.85533000  | 10.55248000  | -0.16765000 |
| H | 8.07729900  | 9.32713600   | -0.43707200 |
| H | 9.11999000  | 9.47972900   | -1.85326200 |
| O | 10.92155400 | -11.10093500 | 0.58590500  |
| C | 13.85569100 | 7.49325900   | -0.32157500 |
| H | 15.50888700 | 6.21838800   | -0.31909400 |
| C | 13.86517600 | -6.97951000  | 0.02189300  |
| H | 15.54368700 | -5.84341700  | 0.78672700  |
| H | 15.47135400 | -5.93073400  | -0.97019900 |
| O | 11.08319400 | 10.56056900  | -0.02880200 |
| N | 9.05360800  | 11.60401400  | 0.12216600  |
| C | 14.74521600 | 8.73338300   | -0.35349300 |
| O | 12.61734000 | 7.56992900   | -0.31397400 |
| O | 12.64029700 | -6.79219700  | -0.03316800 |
| N | 14.39978000 | -8.20722300  | 0.15929400  |
| H | 8.03602500  | 11.51347700  | 0.11991500  |
| N | 13.94270300 | 9.92513000   | -0.19577100 |
| H | 15.50449600 | 8.66966800   | 0.43772800  |
| H | 15.29800800 | 8.75096500   | -1.30482100 |
| H | 15.40091900 | -8.38372200  | 0.21303800  |
| C | 13.55674200 | -9.38129600  | 0.25202300  |
| H | 12.92520800 | 9.84977100   | -0.16640100 |
| C | 14.52637900 | 11.14636500  | -0.11651600 |
| C | 14.43950500 | -10.61611900 | 0.45642000  |
| H | 12.95732100 | -9.51170300  | -0.65696500 |
| H | 12.84901400 | -9.29662200  | 1.08283800  |
| O | 15.73970700 | 11.35093000  | -0.16310900 |
| O | 15.66997200 | -10.52803900 | 0.47067300  |
| N | 13.73701800 | -11.76503500 | 0.60651200  |
| H | 12.71645200 | -11.75499400 | 0.61862700  |
| H | 14.25086000 | -12.62241900 | 0.75432600  |
| H | 9.49009400  | 12.43918300  | 0.48979400  |
| H | 8.98476300  | -11.74307800 | 0.37544500  |
| H | 13.78233500 | 11.95675900  | -0.00110500 |

7 strand anti parallel pleated sheet

|   |             |              |             |
|---|-------------|--------------|-------------|
| C | 0.09072700  | -5.68006300  | 0.60946300  |
| N | -0.39872600 | -4.43002200  | 0.05139900  |
| H | -1.40173600 | -4.33255800  | -0.13030000 |
| C | 0.41781300  | -3.38158600  | -0.17676900 |
| O | 1.63244200  | -3.37661800  | 0.08418800  |
| C | -0.24502000 | -2.17423000  | -0.84498700 |
| N | 0.28053100  | -0.93111800  | -0.30492200 |
| H | 1.29496300  | -0.83490700  | -0.19689400 |
| C | -0.53208100 | -6.87893500  | -0.10835400 |
| O | -1.73102400 | -6.87132300  | -0.43868100 |
| N | 0.29602200  | -7.92498600  | -0.30063200 |
| H | 1.28883300  | -7.82618000  | -0.06486500 |
| C | -0.16333200 | -9.16728400  | -0.89806700 |
| C | 0.38635200  | -10.38509500 | -0.14758600 |
| O | 1.56202700  | -10.43121500 | 0.24081200  |
| N | -0.49186700 | -11.40078700 | -0.00063900 |
| H | -1.47926600 | -11.29549700 | -0.24723200 |
| H | 1.17900600  | -5.70153000  | 0.55096600  |
| H | -1.32794700 | -2.19358600  | -0.72217300 |
| H | -1.25337000 | -9.17469200  | -0.91628200 |
| C | 0.19743300  | 1.30115300   | 0.64992500  |
| N | -0.35687400 | 2.55648600   | 0.16976500  |
| H | -1.37463700 | 2.65467300   | 0.11906000  |
| C | 0.42520800  | 3.60846000   | -0.14687400 |
| O | 1.66304600  | 3.61119600   | -0.04057400 |
| C | -0.31693500 | 4.82155900   | -0.71405500 |
| N | 0.27073400  | 6.06143800   | -0.23381700 |
| H | 1.29074100  | 6.15847500   | -0.25287300 |
| C | -0.48187200 | 7.10053500   | 0.17796600  |
| O | -1.72553100 | 7.10729300   | 0.16830800  |
| C | -0.51697900 | 0.10859500   | 0.01014400  |
| O | -1.74984000 | 0.11663700   | -0.15286100 |
| H | 1.26891100  | 1.27849800   | 0.45026800  |
| H | -1.37565700 | 4.79793300   | -0.45591500 |
| C | 0.30453200  | 8.29345400   | 0.72827000  |
| H | 1.33600400  | 8.28501500   | 0.37488300  |
| H | -1.34232000 | 9.64473400   | 0.43757900  |
| C | 0.37154300  | 10.60984500  | -0.08615700 |
| O | 1.60338100  | 10.66452000  | -0.22319200 |
| N | -0.32566700 | 9.54805300   | 0.35442300  |
| H | 0.32316400  | 8.18241900   | 1.82307600  |

|   |             |              |             |
|---|-------------|--------------|-------------|
| H | -0.23538500 | 4.75862200   | -1.80961900 |
| H | 0.05541900  | 1.20945400   | 1.73737100  |
| H | -0.19135300 | -5.76472000  | 1.66980900  |
| H | -0.02581400 | -2.24748900  | -1.92077000 |
| H | 0.19342900  | -9.25056200  | -1.93572000 |
| C | -5.02265700 | 2.06658200   | 0.91521200  |
| C | -4.34971700 | 3.31929300   | 0.34857100  |
| O | -3.14266600 | 3.31719000   | 0.05620000  |
| N | -5.14660700 | 4.40326100   | 0.24549700  |
| H | -6.14756700 | 4.31257100   | 0.43640600  |
| C | -4.63773200 | 5.68584400   | -0.21303700 |
| C | -5.25352900 | 6.83863100   | 0.58156100  |
| O | -6.45304200 | 6.82063000   | 0.90972700  |
| N | -4.41734600 | 7.86585400   | 0.83714000  |
| H | -3.42330300 | 7.77291100   | 0.60392400  |
| N | -4.51164300 | 0.86732800   | 0.27196000  |
| H | -3.50049900 | 0.78176700   | 0.12849900  |
| C | -5.31569800 | -0.15788800  | -0.07775700 |
| O | -6.54089100 | -0.18453900  | 0.13189300  |
| C | -4.61982400 | -1.29753600  | -0.82483100 |
| N | -5.16120100 | -2.58871400  | -0.43232200 |
| H | -6.17552500 | -2.68852300  | -0.34256400 |
| H | -6.10572500 | 2.10872300   | 0.79865000  |
| H | -3.54999200 | 5.69060800   | -0.14147700 |
| H | -3.54352200 | -1.28840100  | -0.65163900 |
| C | -5.08668600 | -4.92927800  | 0.23026400  |
| C | -4.37005500 | -3.66741600  | -0.25730900 |
| O | -3.13927500 | -3.65807400  | -0.42531400 |
| N | -4.50541800 | -6.12255400  | -0.36244100 |
| H | -3.48460600 | -6.21393000  | -0.37938200 |
| C | -5.26332900 | -7.13942200  | -0.81964500 |
| O | -6.50550500 | -7.16005100  | -0.76733700 |
| C | -4.48797800 | -8.28257000  | -1.48023200 |
| N | -5.10219000 | -9.56557700  | -1.18404400 |
| H | -6.11986900 | -9.66143900  | -1.24356600 |
| C | -4.38861200 | -10.65093900 | -0.83599900 |
| O | -3.15364900 | -10.70612700 | -0.73342600 |
| H | -6.15252300 | -4.89323800  | 0.00520500  |
| H | -3.44669200 | -8.29468200  | -1.15698000 |
| C | -4.86670900 | 9.06928600   | 1.51565300  |
| H | -5.95548300 | 9.11479600   | 1.48580900  |
| C | -4.24470600 | 10.32597000  | 0.89814200  |
| H | -6.06907400 | 11.31271400  | 1.04357100  |

|   |              |             |             |
|---|--------------|-------------|-------------|
| O | -3.05985500  | 10.35507200 | 0.53935300  |
| N | -5.07145900  | 11.39279800 | 0.83558200  |
| H | -4.56190200  | 9.05491200  | 2.57322100  |
| H | -4.50177300  | -8.08928900 | -2.56357300 |
| H | -4.78783300  | -1.11936600 | -1.89793300 |
| H | -4.97691000  | -4.95152900 | 1.32508200  |
| H | -4.80398600  | 2.04922700  | 1.99371800  |
| H | -4.90435500  | 5.85223000  | -1.26792400 |
| C | -13.77649000 | 5.70951700  | 0.95462300  |
| N | -14.59147600 | 4.52412200  | 0.78616200  |
| H | -15.59780100 | 4.67168800  | 0.79877300  |
| C | -14.02153300 | 3.31284500  | 0.62863100  |
| O | -12.79213600 | 3.15615900  | 0.62036600  |
| C | -14.98280100 | 2.13525400  | 0.45968800  |
| N | -14.22147400 | 0.92424400  | 0.24553600  |
| H | -13.20034000 | 0.98612900  | 0.24466700  |
| C | -14.68894800 | 6.92309000  | 1.12667700  |
| O | -15.92086200 | 6.81777700  | 1.11604900  |
| N | -14.03240900 | 8.09651800  | 1.28792300  |
| H | -13.00951700 | 8.12169800  | 1.27896000  |
| C | -14.77266800 | 9.32429100  | 1.45863100  |
| C | -13.81892400 | 10.50553200 | 1.63760400  |
| O | -12.59488900 | 10.38252500 | 1.64141300  |
| N | -14.43452300 | 11.71120500 | 1.79219600  |
| H | -15.43993200 | 11.80569300 | 1.79281800  |
| H | -13.11883900 | 5.61659400  | 1.82601900  |
| H | -15.65961600 | 2.32837700  | -0.38380500 |
| H | -15.42240300 | 9.51525400  | 0.59240400  |
| C | -13.87313400 | -1.43426600 | -0.16740400 |
| N | -14.64293000 | -2.64379900 | -0.37552600 |
| H | -15.65397800 | -2.52879200 | -0.36547100 |
| C | -14.03213200 | -3.83110200 | -0.55239600 |
| O | -12.79799000 | -3.94867500 | -0.55038700 |
| C | -14.95191400 | -5.03616300 | -0.75598700 |
| N | -14.15073800 | -6.21631100 | -1.00148100 |
| H | -13.13148100 | -6.12507700 | -0.99262800 |
| C | -14.72898000 | -7.41705200 | -1.21951600 |
| O | -15.95104500 | -7.60988900 | -1.23038100 |
| C | -14.83488200 | -0.26279100 | 0.04173200  |
| O | -16.06145200 | -0.41987900 | 0.02073900  |
| H | -13.21421700 | -1.53062500 | 0.70256000  |
| H | -15.63411600 | -4.84387900 | -1.59513600 |
| C | -13.74079800 | -8.56327400 | -1.46461400 |

|   |              |              |             |
|---|--------------|--------------|-------------|
| H | -13.04591800 | -8.64348800  | -0.62218300 |
| H | -15.50777700 | -9.68252400  | -1.60586900 |
| C | -13.90496500 | -10.98334600 | -1.80455100 |
| O | -12.68118400 | -11.16400000 | -1.83725800 |
| N | -14.49571600 | -9.78820100  | -1.63851000 |
| H | -13.13174100 | -8.34147600  | -2.34821600 |
| H | -15.58346000 | -5.16811900  | 0.13367900  |
| H | -13.22068900 | -1.22639400  | -1.02222500 |
| H | -13.11878300 | 5.86549000   | 0.09300700  |
| H | -15.61661700 | 2.04986900   | 1.35351400  |
| H | -15.43592900 | 9.26237600   | 2.33315800  |
| C | 13.78585100  | 2.08870400   | -0.44843000 |
| C | 14.73505100  | 3.27031300   | -0.66079600 |
| O | 15.96323800  | 3.12990000   | -0.62519100 |
| N | 14.10585900  | 4.44490100   | -0.88631100 |
| H | 13.08410200  | 4.49274100   | -0.88343600 |
| C | 14.84295400  | 5.67005700   | -1.10758300 |
| C | 13.85259400  | 6.82624200   | -1.26254600 |
| O | 12.62747900  | 6.63292300   | -1.25398600 |
| N | 14.38526200  | 8.05385100   | -1.40638500 |
| H | 15.38650000  | 8.23704900   | -1.41935100 |
| N | 14.56592300  | 0.89698800   | -0.18472200 |
| H | 15.57552800  | 1.02386100   | -0.17931300 |
| C | 13.96640200  | -0.29147400  | 0.02218600  |
| O | 12.73379600  | -0.42599200  | -0.00488100 |
| C | 14.89743300  | -1.47412500  | 0.29695300  |
| N | 14.10583400  | -2.65890900  | 0.54383300  |
| H | 13.08748500  | -2.57962900  | 0.49481500  |
| H | 13.15584800  | 1.95910600   | -1.33582500 |
| H | 15.52566800  | 5.87456500   | -0.27191300 |
| H | 15.54090300  | -1.24472700  | 1.15731800  |
| C | 13.68875000  | -4.98100300  | 1.07169100  |
| C | 14.68562200  | -3.84320700  | 0.84651500  |
| O | 15.90615700  | -4.01811800  | 0.93756600  |
| N | 14.40905000  | -6.19543400  | 1.39249500  |
| H | 15.42154700  | -6.11415900  | 1.44092800  |
| C | 13.74997500  | -7.35743300  | 1.57862000  |
| O | 12.51423000  | -7.42849200  | 1.49364000  |
| C | 14.61143800  | -8.57781700  | 1.89212200  |
| N | 13.77094800  | -9.71931100  | 2.17516100  |
| H | 12.75758000  | -9.63837300  | 2.08051900  |
| C | 14.31626000  | -10.90409300 | 2.54580200  |
| O | 15.52281600  | -11.11359300 | 2.67465900  |

|   |             |              |             |
|---|-------------|--------------|-------------|
| H | 13.07539200 | -5.11412900  | 0.1736480   |
| H | 15.26979100 | -8.35913500  | 2.74408200  |
| C | 13.53754600 | 9.21888100   | -1.55336900 |
| H | 12.89939900 | 9.13492400   | -2.44092700 |
| C | 14.41712700 | 10.46644000  | -1.67532800 |
| H | 12.69110100 | 11.60960600  | -1.72280200 |
| O | 15.64804500 | 10.38457500  | -1.68218300 |
| N | 13.71033100 | 11.61842800  | -1.77478500 |
| C | 9.71792700  | -5.59310300  | 1.40428800  |
| N | 9.19118700  | -4.44320000  | 0.68813800  |
| H | 8.18575900  | -4.40341100  | 0.50029400  |
| C | 9.97258500  | -3.39530700  | 0.34878000  |
| O | 11.18008200 | -3.31101300  | 0.62144100  |
| C | 9.27195800  | -2.31369000  | -0.47740100 |
| N | 9.85355800  | -1.00634000  | -0.22223600 |
| H | 10.86742500 | -0.94178100  | -0.11270900 |
| C | 8.98725900  | -6.87321600  | 0.99319000  |
| O | 7.78546200  | -6.84908100  | 0.67436700  |
| N | 9.72656600  | -7.99750200  | 1.05626400  |
| H | 10.72555000 | -7.93613600  | 1.26841200  |
| C | 9.15913100  | -9.30371200  | 0.7730100   |
| C | 9.72571500  | -10.37698600 | 1.7091140   |
| O | 10.89662700 | -10.34793200 | 2.10360300  |
| N | 8.85189100  | -11.36842500 | 2.00413600  |
| H | 7.86526000  | -11.30110100 | 1.74721500  |
| H | 10.79073100 | -5.67825000  | 1.22802100  |
| H | 8.20234400  | -2.28781600  | -0.26989200 |
| H | 8.07302100  | -9.25401100  | 0.85011700  |
| C | 9.86628800  | 1.38492300   | 0.20479800  |
| N | 9.24733900  | 2.55212900   | -0.40028700 |
| H | 8.22631300  | 2.58781500   | -0.46436900 |
| C | 9.97618400  | 3.62270100   | -0.78486200 |
| O | 11.20644200 | 3.70840800   | -0.64833200 |
| C | 9.17675000  | 4.72624800   | -1.48184300 |
| N | 9.77133200  | 6.03093100   | -1.24453100 |
| H | 10.79060300 | 6.10503100   | -1.23568700 |
| C | 9.02063900  | 7.13679100   | -1.07007100 |
| O | 7.77862400  | 7.14522300   | -1.11013100 |
| C | 9.10091200  | 0.11020000   | -0.15713800 |
| O | 7.86996500  | 0.12888300   | -0.32754800 |
| H | 10.90957000 | 1.31966200   | -0.10666800 |
| H | 8.13773700  | 4.72879900   | -1.15265900 |
| C | 9.81115300  | 8.40900200   | -0.7570210  |



|   |             |             |             |
|---|-------------|-------------|-------------|
| H | 10.78367400 | 8.39032600  | -1.25079500 |
| H | 8.04848700  | 9.58223100  | -1.14373900 |
| C | 9.68427300  | 10.74360600 | -1.49192300 |
| O | 10.91084100 | 10.92853500 | -1.51490800 |
| N | 9.07298000  | 9.59208900  | -1.15997100 |
| H | 10.00265300 | 8.41355200  | 0.32754400  |
| H | 12.86500800 | 9.33113300  | -0.69677600 |
| H | 15.27577000 | -8.77775700 | 1.03820900  |
| H | 15.56775500 | -1.61892000 | -0.56200800 |
| H | 12.99482000 | -4.70710400 | 1.87376500  |
| H | 13.10369600 | 2.30817700  | 0.37934300  |
| H | 15.46661800 | 5.59972700  | -2.00986600 |
| H | 9.17886100  | 4.48975800  | -2.55688900 |
| H | 9.85939000  | 1.46180100  | 1.30325500  |
| H | 9.57470700  | -5.47776100 | 2.48992300  |
| H | 9.39430100  | -2.59113700 | -1.53545900 |
| H | 9.40400600  | -9.61857000 | -0.25291000 |
| C | 4.56785400  | 2.15295600  | 0.41855400  |
| C | 5.22017700  | 3.30956200  | -0.34243200 |
| O | 6.42916000  | 3.28505000  | -0.62727900 |
| N | 4.40012100  | 4.34518200  | -0.61775800 |
| H | 3.40010100  | 4.26068200  | -0.41356200 |
| C | 4.87736900  | 5.55772700  | -1.26239900 |
| C | 4.24413300  | 6.79766700  | -0.62755300 |
| O | 3.04901600  | 6.79887200  | -0.28551200 |
| N | 5.05848600  | 7.86687400  | -0.51957100 |
| H | 6.04975900  | 7.76847400  | -0.75699400 |
| N | 5.08468700  | 0.87089100  | -0.03175400 |
| H | 6.09548600  | 0.76629700  | -0.15775000 |
| C | 4.28012900  | -0.19493400 | -0.21946500 |
| O | 3.05348000  | -0.18224100 | -0.01733400 |
| C | 4.97322200  | -1.44709500 | -0.76213200 |
| N | 4.41705800  | -2.64837300 | -0.16139400 |
| H | 3.39940800  | -2.72885300 | -0.08103500 |
| H | 3.48346900  | 2.16415300  | 0.30798500  |
| H | 5.96556400  | 5.59403600  | -1.20812200 |
| H | 6.04850800  | -1.41628800 | -0.58461400 |
| C | 4.44674400  | -4.81982400 | 0.93013800  |
| C | 5.19350500  | -3.68025700 | 0.23198100  |
| O | 6.42780900  | -3.71134100 | 0.09787800  |
| N | 5.00773300  | -6.11359900 | 0.57671700  |
| H | 6.02585700  | -6.22766700 | 0.59206600  |
| C | 4.22744500  | -7.17752000 | 0.30140100  |

|   |              |              |             |
|---|--------------|--------------|-------------|
| O | 2.98431100   | -7.15336800  | 0.33087500  |
| C | 4.97606300   | -8.44610100  | -0.11750100 |
| N | 4.30841000   | -9.63523700  | 0.38319400  |
| H | 3.29166300   | -9.72071500  | 0.28860200  |
| C | 4.96826500   | -10.65435300 | 0.96325800  |
| O | 6.19371700   | -10.72027700 | 1.14079700  |
| H | 3.38456900   | -4.80761000  | 0.68598600  |
| H | 6.00778500   | -8.43145700  | 0.23538100  |
| C | 4.58592500   | 9.13963200   | -0.00180200 |
| H | 3.49583200   | 9.14186000   | 0.00482900  |
| C | 5.13589900   | 10.31538700  | -0.81599500 |
| H | 3.27044400   | 11.22959700  | -0.75864400 |
| O | 6.31122400   | 10.34148700  | -1.20735700 |
| N | 4.25697100   | 11.32216200  | -1.01367700 |
| H | 4.92966400   | 9.28663500   | 1.03330200  |
| H | 4.99894000   | -8.45141300  | -1.21783000 |
| H | 4.81424900   | -1.45060400  | -1.85118300 |
| H | 4.54493300   | -4.64274800  | 2.01187600  |
| H | 4.79850300   | 2.30702800   | 1.48359300  |
| H | 4.59505200   | 5.56653500   | -2.32610900 |
| H | -13.86240400 | 12.53427300  | 1.92434800  |
| H | -4.69594200  | 12.25812700  | 0.46975900  |
| H | -0.27777100  | 11.46842800  | -0.32729400 |
| H | 4.58054600   | 12.13869000  | -1.51580700 |
| H | 8.96828800   | 11.53928600  | -1.75756700 |
| H | 14.22096600  | 12.48728900  | -1.84731800 |
| H | 13.54707600  | -11.67846800 | 2.72540600  |
| H | 9.17877800   | -12.12616800 | 2.58892300  |
| H | 4.29054200   | -11.46424900 | 1.28234900  |
| H | -0.16679200  | -12.24255400 | 0.45700400  |
| H | -5.02720400  | -11.52888400 | -0.64017800 |
| H | -14.61987800 | -11.81784900 | -1.91308900 |
| C | -9.32724000  | -5.78415900  | -0.11516300 |
| N | -9.92610300  | -4.48462800  | -0.36922900 |
| H | -10.94129200 | -4.43005700  | -0.46962100 |
| C | -9.18524000  | -3.35880000  | -0.41864200 |
| O | -7.95723100  | -3.32895200  | -0.23686900 |
| C | -9.95965500  | -2.08949300  | -0.77973500 |
| N | -9.35327300  | -0.92079500  | -0.16494300 |
| H | -8.33295600  | -0.88343500  | -0.08325500 |
| C | -10.03444600 | -6.87813600  | -0.91608400 |
| O | -11.25339600 | -6.82133500  | -1.14520600 |
| N | -9.24625700  | -7.91029600  | -1.28718200 |

|   |              |              |             |
|---|--------------|--------------|-------------|
| H | -8.23442800  | -7.85126500  | -1.13684200 |
| C | -9.78719200  | -9.06445400  | -1.98231100 |
| C | -9.06403500  | -10.35228800 | -1.57869800 |
| O | -7.85144300  | -10.36533100 | -1.32996300 |
| N | -9.84124100  | -11.45751200 | -1.57769600 |
| H | -10.85473300 | -11.40973900 | -1.69527400 |
| H | -8.26291500  | -5.75206600  | -0.34718200 |
| H | -11.00420200 | -2.16525700  | -0.47512300 |
| H | -10.85695200 | -9.13585300  | -1.78324800 |
| C | -9.30473900  | 1.24747100   | 0.92452500  |
| N | -9.90619900  | 2.55006900   | 0.69109300  |
| H | -10.92444100 | 2.61111500   | 0.63961200  |
| C | -9.15931000  | 3.66876700   | 0.59463600  |
| O | -7.92306100  | 3.68843400   | 0.70907000  |
| C | -9.94128700  | 4.94344700   | 0.26979500  |
| N | -9.27986900  | 6.11246100   | 0.82559000  |
| H | -8.25548500  | 6.13303900   | 0.84700300  |
| C | -9.97364500  | 7.20534900   | 1.20294800  |
| O | -11.20791800 | 7.31242700   | 1.10325800  |
| C | -10.09053000 | 0.14602600   | 0.21103100  |
| O | -11.31934100 | 0.23018600   | 0.05479100  |
| H | -8.26250600  | 1.25768800   | 0.60524200  |
| H | -10.96284800 | 4.88324300   | 0.64659300  |
| C | -9.13727100  | 8.31483700   | 1.84237800  |
| H | -8.11947300  | 8.31477800   | 1.45119000  |
| H | -10.77211700 | 9.67825900   | 1.61798100  |
| C | -9.03847700  | 10.73080200  | 1.41640800  |
| O | -7.80170000  | 10.80393900  | 1.400401    |
| N | -9.75430300  | 9.61104600   | 1.62102100  |
| H | -9.07317700  | 8.09112800   | 2.91823700  |
| H | -10.00318400 | 5.01250100   | -0.82733500 |
| H | -9.31346100  | 1.00211300   | 1.99763000  |
| H | -9.42290600  | -6.05521000  | 0.94747600  |
| H | -9.94599100  | -2.00723200  | -1.87768200 |
| H | -9.66307700  | -8.96192800  | -3.07164800 |
| H | -9.67507900  | 11.61761000  | 1.25449400  |
| H | -9.40001500  | -12.34303000 | -1.36622200 |

7 strand anti parallel sheet constrained to Cs symmetry

|   |             |              |             |
|---|-------------|--------------|-------------|
| C | 5.84754600  | -9.97865600  | 0.00000000  |
| N | 4.61583100  | -9.21527200  | 0.00000000  |
| H | 4.66951500  | -8.19394400  | 0.00000000  |
| C | 3.42410000  | -9.84305400  | 0.00000000  |
| O | 3.30133700  | -11.07821700 | 0.00000000  |
| C | 2.21024100  | -8.91587500  | 0.00000000  |
| N | 0.98391900  | -9.68832700  | 0.00000000  |
| H | 1.04691400  | -10.70865900 | 0.00000000  |
| C | 7.05451800  | -9.04364600  | 0.00000000  |
| O | 6.92518700  | -7.80811000  | 0.00000000  |
| N | 8.25379000  | -9.65639600  | 0.00000000  |
| H | 8.32195600  | -10.67698700 | 0.00000000  |
| C | 9.46675400  | -8.86642800  | 0.00000000  |
| C | 10.70985700 | -9.75662500  | 0.00000000  |
| O | 10.64027500 | -10.98970600 | 0.00000000  |
| N | 11.86947000 | -9.05710900  | 0.00000000  |
| H | 11.87161000 | -8.03597800  | 0.00000000  |
| H | 5.90456600  | -10.63859100 | 0.87298600  |
| H | 2.26120700  | -8.25633300  | -0.87386000 |
| H | 9.50594200  | -8.20674400  | -0.87506500 |
| C | -2.16897800 | -13.66527600 | 0.00000000  |
| C | -3.36476000 | -14.62313800 | 0.00000000  |
| O | -3.20787400 | -15.85002600 | 0.00000000  |
| N | -4.56846900 | -14.00843700 | 0.00000000  |
| H | -4.63247700 | -12.98799000 | 0.00000000  |
| C | -5.80266400 | -14.76501700 | 0.00000000  |
| C | -6.98703600 | -13.79465200 | 0.00000000  |
| O | -6.81898300 | -12.56670200 | 0.00000000  |
| N | -8.21256300 | -14.35425500 | 0.00000000  |
| H | -8.37405400 | -15.35940100 | 0.00000000  |
| N | -0.94563300 | -14.44284700 | 0.00000000  |
| H | -1.07261600 | -15.45266300 | 0.00000000  |
| C | 0.26545200  | -13.84916100 | 0.00000000  |
| O | 0.40239400  | -12.61740200 | 0.00000000  |
| C | 1.47151800  | -14.79297200 | 0.00000000  |
| N | 2.69191300  | -14.01493900 | 0.00000000  |
| H | 2.61364200  | -12.99619700 | 0.00000000  |
| H | -2.22258300 | -13.00965500 | 0.87601300  |
| H | -5.86276800 | -15.42003200 | -0.88001700 |
| H | 1.42405400  | -15.44955100 | -0.87975600 |
| C | -1.42331300 | -9.99454400  | 0.00000000  |

|   |              |              |             |
|---|--------------|--------------|-------------|
| N | -2.65040800  | -9.22388300  | 0.00000000  |
| H | -2.59043300  | -8.20298200  | 0.00000000  |
| C | -3.84639500  | -9.84569600  | 0.00000000  |
| O | -3.97156200  | -11.08012200 | 0.00000000  |
| C | -5.05392200  | -8.90957200  | 0.00000000  |
| N | -6.29200700  | -9.66467900  | 0.00000000  |
| H | -6.24737600  | -10.68645000 | 0.00000000  |
| C | -7.47558300  | -9.02128200  | 0.00000000  |
| O | -7.57393900  | -7.78323400  | 0.00000000  |
| C | -0.21042400  | -9.06612200  | 0.00000000  |
| O | -0.33235300  | -7.83047100  | 0.00000000  |
| H | -1.37035700  | -10.65410400 | 0.87407100  |
| H | -4.99539400  | -8.24982600  | -0.87321100 |
| C | 5.08594400   | -13.63478900 | 0.00000000  |
| C | 3.90656100   | -14.61143300 | 0.00000000  |
| O | 4.07884600   | -15.83582500 | 0.00000000  |
| N | 6.32501800   | -14.38547500 | 0.00000000  |
| H | 6.22548200   | -15.39776300 | 0.00000000  |
| C | 7.52350200   | -13.76337200 | 0.00000000  |
| O | 7.62439200   | -12.52738300 | 0.00000000  |
| C | 8.74820700   | -14.67648600 | 0.00000000  |
| N | 9.95673100   | -13.88309000 | 0.00000000  |
| H | 9.88915100   | -12.86593600 | 0.00000000  |
| C | 11.17618100  | -14.47600500 | 0.00000000  |
| O | 11.36665700  | -15.69224800 | 0.00000000  |
| H | 5.01897200   | -12.97933500 | 0.87522500  |
| H | 8.71288400   | -15.33669000 | -0.87831700 |
| C | -9.40812600  | -13.53672500 | 0.00000000  |
| H | -9.44087700  | -12.88185700 | 0.87781800  |
| H | -9.44087700  | -12.88185700 | -0.87781800 |
| C | -8.70927000  | -9.92262100  | 0.00000000  |
| H | -8.67231800  | -10.58195000 | -0.87522500 |
| H | -8.67231800  | -10.58195000 | 0.87522500  |
| H | -9.85221700  | -8.10600800  | 0.00000000  |
| C | -11.13462200 | -9.70164700  | 0.00000000  |
| O | -11.33933400 | -10.92514200 | 0.00000000  |
| N | -9.92053300  | -9.12597800  | 0.00000000  |
| H | -4.99539400  | -8.24982600  | 0.87321100  |
| H | -1.37035700  | -10.65410400 | -0.87407100 |
| H | 2.26120700   | -8.25633300  | 0.87386000  |
| H | 5.90456600   | -10.63859100 | -0.87298600 |
| H | 9.50594200   | -8.20674400  | 0.87506500  |
| H | 8.71288400   | -15.33669000 | 0.87831700  |

|   |              |              |             |
|---|--------------|--------------|-------------|
| H | 1.42405400   | -15.44955100 | 0.87975600  |
| H | -5.86276800  | -15.42003200 | 0.88001700  |
| C | -10.63768200 | -14.45041100 | 0.00000000  |
| H | -11.83677600 | -12.75798300 | 0.00000000  |
| O | -10.52122500 | -15.67872200 | 0.00000000  |
| N | -11.81400300 | -13.77834500 | 0.00000000  |
| H | 5.01897200   | -12.97933500 | -0.87522500 |
| H | -2.22258300  | -13.00965500 | -0.87601300 |
| C | 5.84414100   | -0.49691500  | 0.00000000  |
| N | 4.61681900   | 0.27359100   | 0.00000000  |
| H | 4.67350000   | 1.29457800   | 0.00000000  |
| C | 3.42357200   | -0.35164100  | 0.00000000  |
| O | 3.30372900   | -1.58689700  | 0.00000000  |
| C | 2.20942800   | 0.57497200   | 0.00000000  |
| N | 0.98128500   | -0.19454200  | 0.00000000  |
| H | 1.03716300   | -1.21625800  | 0.00000000  |
| C | 7.05765300   | 0.42876100   | 0.00000000  |
| O | 6.93869900   | 1.66525600   | 0.00000000  |
| N | 8.25243300   | -0.19429700  | 0.00000000  |
| H | 8.30983400   | -1.21582500  | 0.00000000  |
| C | 9.46968100   | 0.58873600   | 0.00000000  |
| C | 10.71290300  | -0.30059000  | 0.00000000  |
| O | 10.64867300  | -1.53519500  | 0.00000000  |
| N | 11.87013300  | 0.40151500   | 0.00000000  |
| H | 11.86849700  | 1.42314800   | 0.00000000  |
| H | 5.89670300   | -1.15732300  | 0.87304300  |
| H | 2.26197700   | 1.23484900   | -0.87360900 |
| H | 9.51157800   | 1.24912800   | -0.87446200 |
| C | -2.14740200  | -4.17171100  | 0.00000000  |
| C | -3.36319000  | -5.09554600  | 0.00000000  |
| O | -3.24780000  | -6.33130900  | 0.00000000  |
| N | -4.55464500  | -4.46601100  | 0.00000000  |
| H | -4.60744200  | -3.44471600  | 0.00000000  |
| C | -5.78374000  | -5.23303500  | 0.00000000  |
| C | -6.99597300  | -4.30585200  | 0.00000000  |
| O | -6.87735500  | -3.06965700  | 0.00000000  |
| N | -8.19161600  | -4.92814100  | 0.00000000  |
| H | -8.24949100  | -5.94929000  | 0.00000000  |
| N | -0.91990400  | -4.94172200  | 0.00000000  |
| H | -0.97489600  | -5.96322000  | 0.00000000  |
| C | 0.27249200   | -4.31426800  | 0.00000000  |
| O | 0.38790700   | -3.07786400  | 0.00000000  |
| C | 1.48798500   | -5.23865100  | 0.00000000  |

|   |              |             |             |
|---|--------------|-------------|-------------|
| N | 2.71580600   | -4.46877600 | 0.00000000  |
| H | 2.66008800   | -3.44775300 | 0.00000000  |
| H | -2.19926400  | -3.51158700 | 0.87356300  |
| H | -5.83786800  | -5.89356900 | -0.87289000 |
| H | 1.43548700   | -5.89910600 | -0.87330500 |
| C | -1.42579300  | -0.49568900 | 0.00000000  |
| N | -2.65433900  | 0.27368100  | 0.00000000  |
| H | -2.59748000  | 1.29465500  | 0.00000000  |
| C | -3.84812900  | -0.35154100 | 0.00000000  |
| O | -3.96814100  | -1.58661800 | 0.00000000  |
| C | -5.06177500  | 0.57633400  | 0.00000000  |
| N | -6.29432700  | -0.18782100 | 0.00000000  |
| H | -6.24510100  | -1.21003900 | 0.00000000  |
| C | -7.48257400  | 0.44629700  | 0.00000000  |
| O | -7.59030800  | 1.68402200  | 0.00000000  |
| C | -0.21150500  | 0.43091200  | 0.00000000  |
| O | -0.33081100  | 1.66720400  | 0.00000000  |
| H | -1.37292800  | -1.15590300 | 0.87330800  |
| H | -5.00772600  | 1.23615600  | -0.87351900 |
| C | 5.12310900   | -4.16788500 | 0.00000000  |
| C | 3.90959600   | -5.09545400 | 0.00000000  |
| O | 4.02674600   | -6.33053100 | 0.00000000  |
| N | 6.35718900   | -4.92930900 | 0.00000000  |
| H | 6.31237700   | -5.95188200 | 0.00000000  |
| C | 7.54301700   | -4.28976700 | 0.00000000  |
| O | 7.64415800   | -3.05148800 | 0.00000000  |
| C | 8.77349400   | -5.19531800 | 0.00000000  |
| N | 9.98756200   | -4.40243200 | 0.00000000  |
| H | 9.92242200   | -3.38242300 | 0.00000000  |
| C | 11.19960100  | -4.98235800 | 0.00000000  |
| O | 11.40076600  | -6.20630500 | 0.00000000  |
| H | 5.06810700   | -3.50775700 | 0.87331700  |
| H | 8.73423100   | -5.85579600 | -0.87411100 |
| C | -9.40807100  | -4.14432600 | 0.00000000  |
| H | -9.44967400  | -3.48382100 | 0.87443300  |
| H | -9.44967400  | -3.48382100 | -0.87443300 |
| C | -8.70877600  | -0.46553000 | 0.00000000  |
| H | -8.66641600  | -1.12573800 | -0.87407200 |
| H | -8.66641600  | -1.12573800 | 0.87407200  |
| H | -9.86503000  | 1.34204000  | 0.00000000  |
| C | -11.13592900 | -0.26280000 | 0.00000000  |
| O | -11.33274400 | -1.48790200 | 0.00000000  |
| N | -9.92664000  | 0.32167600  | 0.00000000  |



|   |              |             |             |
|---|--------------|-------------|-------------|
| H | -5.00772600  | 1.23615600  | 0.87351900  |
| H | -1.37292800  | -1.15590300 | -0.87330800 |
| H | 2.26197700   | 1.23484900  | 0.87360900  |
| H | 5.89670300   | -1.15732300 | -0.87304300 |
| H | 9.51157800   | 1.24912800  | 0.87446200  |
| H | 8.73423100   | -5.85579600 | 0.87411100  |
| H | 1.43548700   | -5.89910600 | 0.87330500  |
| H | -5.83786800  | -5.89356900 | 0.87289000  |
| C | -10.65183700 | -5.03256000 | 0.00000000  |
| H | -11.80657200 | -3.30820600 | 0.00000000  |
| O | -10.58879100 | -6.26751800 | 0.00000000  |
| N | -11.80863400 | -4.32996800 | 0.00000000  |
| H | 5.06810700   | -3.50775700 | -0.87331700 |
| H | -2.19926400  | -3.51158700 | -0.87356300 |
| C | 5.84094400   | 8.97972000  | 0.00000000  |
| N | 4.61792200   | 9.75723400  | 0.00000000  |
| H | 4.68308200   | 10.77692600 | 0.00000000  |
| C | 3.42121200   | 9.13843600  | 0.00000000  |
| O | 3.29605900   | 7.90405800  | 0.00000000  |
| C | 2.21093700   | 10.07027000 | 0.00000000  |
| N | 0.98128500   | 9.30358500  | 0.00000000  |
| H | 1.03675200   | 8.28175400  | 0.00000000  |
| C | 7.05791900   | 9.90068300  | 0.00000000  |
| O | 6.94214400   | 11.13734600 | 0.00000000  |
| N | 8.25017000   | 9.27177600  | 0.00000000  |
| H | 8.30214200   | 8.24982000  | 0.00000000  |
| C | 9.47191900   | 10.04744000 | 0.00000000  |
| C | 10.71020600  | 9.15088300  | 0.00000000  |
| O | 10.63964800  | 7.91717900  | 0.00000000  |
| N | 11.87254300  | 9.84530300  | 0.00000000  |
| H | 11.87840800  | 10.86567000 | 0.00000000  |
| H | 5.88977600   | 8.31956500  | 0.87342500  |
| H | 2.26569000   | 10.72942100 | -0.87419400 |
| H | 9.51794900   | 10.70704500 | -0.87493100 |
| C | -2.15052700  | 5.31869200  | 0.00000000  |
| C | -3.36467000  | 4.39257400  | 0.00000000  |
| O | -3.24687400  | 3.15743500  | 0.00000000  |
| N | -4.55840600  | 5.01831800  | 0.00000000  |
| H | -4.61503000  | 6.03892400  | 0.00000000  |
| C | -5.78451900  | 4.24630800  | 0.00000000  |
| C | -7.00082900  | 5.16784800  | 0.00000000  |
| O | -6.88785300  | 6.40517000  | 0.00000000  |
| N | -8.19289700  | 4.53895200  | 0.00000000  |

|   |             |             |             |
|---|-------------|-------------|-------------|
| H | -8.24493300 | 3.51696700  | 0.00000000  |
| N | -0.92227500 | 4.55003100  | 0.00000000  |
| H | -0.97626900 | 3.52821600  | 0.00000000  |
| C | 0.27000100  | 5.17768400  | 0.00000000  |
| O | 0.38598900  | 6.41415600  | 0.00000000  |
| C | 1.48450100  | 4.25179800  | 0.00000000  |
| N | 2.71404600  | 5.01921400  | 0.00000000  |
| H | 2.66035800  | 6.04026700  | 0.00000000  |
| H | -2.20340600 | 5.97862100  | 0.87370000  |
| H | -5.83588400 | 3.58564700  | -0.87301700 |
| H | 1.43095900  | 3.59133700  | -0.87315100 |
| C | -1.42383800 | 8.99956600  | 0.00000000  |
| N | -2.65350800 | 9.76767000  | 0.00000000  |
| H | -2.59421700 | 10.78788300 | 0.00000000  |
| C | -3.84639500 | 9.14118700  | 0.00000000  |
| O | -3.96626100 | 7.90642700  | 0.00000000  |
| C | -5.06261400 | 10.06633900 | 0.00000000  |
| N | -6.29063600 | 9.29490000  | 0.00000000  |
| H | -6.23293100 | 8.27285700  | 0.00000000  |
| C | -7.48425000 | 9.91728300  | 0.00000000  |
| O | -7.60641500 | 11.15428100 | 0.00000000  |
| C | -0.21168600 | 9.92930100  | 0.00000000  |
| O | -0.33400500 | 11.16507100 | 0.00000000  |
| H | -1.37054600 | 8.33969600  | 0.87343100  |
| H | -5.01167700 | 10.72496000 | -0.87479800 |
| C | 5.12251000  | 5.31431100  | 0.00000000  |
| C | 3.90641000  | 4.39021400  | 0.00000000  |
| O | 4.02191000  | 3.15486400  | 0.00000000  |
| N | 6.35321200  | 4.54749900  | 0.00000000  |
| H | 6.30320700  | 3.52536200  | 0.00000000  |
| C | 7.54220300  | 5.18085600  | 0.00000000  |
| O | 7.64925300  | 6.41851500  | 0.00000000  |
| C | 8.76792000  | 4.26873200  | 0.00000000  |
| N | 9.98613500  | 5.05521700  | 0.00000000  |
| H | 9.92545700  | 6.07561000  | 0.00000000  |
| C | 11.19509400 | 4.46963900  | 0.00000000  |
| O | 11.39068300 | 3.24448300  | 0.00000000  |
| H | 5.07008600  | 5.97421800  | 0.87367100  |
| H | 8.72503500  | 3.60837900  | -0.87395900 |
| C | -9.41396700 | 5.31551200  | 0.00000000  |
| H | -9.45935700 | 5.97561100  | 0.87457400  |
| H | -9.45935700 | 5.97561100  | -0.87457400 |
| C | -8.70120300 | 8.99237900  | 0.00000000  |

|   |              |             |             |
|---|--------------|-------------|-------------|
| H | -8.65360800  | 8.33279800  | -0.87401000 |
| H | -8.65360800  | 8.33279800  | 0.87401000  |
| H | -9.85716400  | 10.79109500 | 0.00000000  |
| C | -11.13322800 | 9.18821200  | 0.00000000  |
| O | -11.33133000 | 7.96455800  | 0.00000000  |
| N | -9.92341100  | 9.77275800  | 0.00000000  |
| H | -5.01167700  | 10.72496000 | 0.87479800  |
| H | -1.37054600  | 8.33969600  | -0.87343100 |
| H | 2.26569000   | 10.72942100 | 0.87419400  |
| H | 5.88977600   | 8.31956500  | -0.87342500 |
| H | 9.51794900   | 10.70704500 | 0.87493100  |
| H | 8.72503500   | 3.60837900  | 0.87395900  |
| H | 1.43095900   | 3.59133700  | 0.87315100  |
| H | -5.83588400  | 3.58564700  | 0.87301700  |
| C | -10.65333100 | 4.42065300  | 0.00000000  |
| H | -11.81672600 | 6.13868600  | 0.00000000  |
| O | -10.58485300 | 3.18665000  | 0.00000000  |
| N | -11.81408300 | 5.11765300  | 0.00000000  |
| H | 5.07008600   | 5.97421800  | -0.87367100 |
| H | -2.20340600  | 5.97862100  | -0.87370000 |
| C | -2.15692000  | 14.86741600 | 0.00000000  |
| C | -3.35703200  | 13.91727800 | 0.00000000  |
| O | -3.21394800  | 12.68712600 | 0.00000000  |
| N | -4.57258700  | 14.50284300 | 0.00000000  |
| H | -4.70647800  | 15.51134700 | 0.00000000  |
| C | -5.78648700  | 13.71115200 | 0.00000000  |
| C | -6.99152300  | 14.65276400 | 0.00000000  |
| O | -6.85304600  | 15.88163200 | 0.00000000  |
| N | -8.19381300  | 14.02980700 | 0.00000000  |
| H | -8.25135200  | 13.00861200 | 0.00000000  |
| N | -0.93267100  | 14.09516200 | 0.00000000  |
| H | -1.00431500  | 13.07529200 | 0.00000000  |
| C | 0.27634100   | 14.70031500 | 0.00000000  |
| O | 0.44077400   | 15.92618900 | 0.00000000  |
| C | 1.46572400   | 13.73528500 | 0.00000000  |
| N | 2.69309400   | 14.50676100 | 0.00000000  |
| H | 2.57096900   | 15.51721000 | 0.00000000  |
| H | -2.20729400  | 15.52359500 | 0.87986400  |
| H | -5.83303500  | 13.05481700 | -0.87586600 |
| H | 1.40840700   | 13.07986200 | -0.87581900 |
| C | 5.11095700   | 14.84533200 | 0.00000000  |
| C | 3.90103800   | 13.90748900 | 0.00000000  |
| O | 4.03399100   | 12.67559600 | 0.00000000  |

|   |              |              |             |
|---|--------------|--------------|-------------|
| N | 6.32857400   | 14.06132900  | 0.00000000  |
| H | 6.24884500   | 13.04222700  | 0.00000000  |
| C | 7.54041700   | 14.65808900  | 0.00000000  |
| O | 7.71107900   | 15.88346300  | 0.00000000  |
| C | 8.73093500   | 13.69090300  | 0.00000000  |
| N | 9.95152100   | 14.47367700  | 0.00000000  |
| H | 9.81431500   | 15.48265900  | 0.00000000  |
| C | 11.17735100  | 13.92171400  | 0.00000000  |
| O | 11.40366300  | 12.70510800  | 0.00000000  |
| H | 5.06806900   | 15.50188900  | 0.87980100  |
| H | 8.67714000   | 13.03659900  | -0.87665800 |
| C | -9.41041200  | 14.80858700  | 0.00000000  |
| H | -9.45282800  | 15.46697000  | 0.87939600  |
| H | -9.45282800  | 15.46697000  | -0.87939600 |
| H | 8.67714000   | 13.03659900  | 0.87665800  |
| H | 1.40840700   | 13.07986200  | 0.87581900  |
| H | -5.83303500  | 13.05481700  | 0.87586600  |
| C | -10.63678300 | 13.89509000  | 0.00000000  |
| H | -11.88683000 | 15.56307100  | 0.00000000  |
| O | -10.55877200 | 12.66779000  | 0.00000000  |
| N | -11.82973300 | 14.55487800  | 0.00000000  |
| H | 5.06806900   | 15.50188900  | -0.87980100 |
| H | -2.20729400  | 15.52359500  | -0.87986400 |
| H | 11.99284900  | 14.66646900  | 0.00000000  |
| H | 12.73965500  | 9.32632900   | 0.00000000  |
| H | 12.02556800  | 5.19506000   | 0.00000000  |
| H | 12.74039100  | -0.11212200  | 0.00000000  |
| H | 12.02633700  | -4.25258800  | 0.00000000  |
| H | 12.73746800  | -9.57461100  | 0.00000000  |
| H | 11.99906400  | -13.73676600 | 0.00000000  |
| H | -12.66959300 | -14.31593100 | 0.00000000  |
| H | -11.95867800 | -8.96902100  | 0.00000000  |
| H | -12.67911400 | -4.84320300  | 0.00000000  |
| H | -11.96578800 | 0.46333400   | 0.00000000  |
| H | -12.68204200 | 4.60017100   | 0.00000000  |
| H | -11.96331900 | 9.91482900   | 0.00000000  |
| H | -12.68345200 | 14.01338500  | 0.00000000  |

7 strand parallel pleated sheet

|   |             |             |             |
|---|-------------|-------------|-------------|
| C | 9.27154500  | 10.17308500 | -2.18989900 |
| O | 8.04630900  | 10.14838200 | -2.02407000 |
| N | 10.04147300 | 9.14973800  | -2.61938500 |
| H | 11.04148200 | 9.33667200  | -2.72447300 |
| C | 9.49564500  | 7.84351100  | -2.95381300 |
| C | 10.19837100 | 6.72266800  | -2.17725100 |
| H | 9.65490300  | 7.62969400  | -4.02029100 |
| H | 8.42325900  | 7.85418100  | -2.75299600 |
| O | 11.43790300 | 6.62719300  | -2.18897500 |
| N | 9.38232400  | 5.86059100  | -1.53256900 |
| H | 8.37276700  | 6.03852500  | -1.52891500 |
| C | 9.91357400  | 4.74027900  | -0.77365300 |
| C | 9.24471300  | 3.41919500  | -1.16402400 |
| H | 9.71310000  | 4.88126700  | 0.29846700  |
| H | 10.99299400 | 4.70293100  | -0.92227900 |
| O | 8.00986900  | 3.33143000  | -1.22517000 |
| N | 10.08956300 | 2.38393600  | -1.38182700 |
| H | 11.09586200 | 2.55971300  | -1.37480400 |
| C | 9.60374900  | 1.04389700  | -1.67580500 |
| C | 10.12872400 | 0.01955100  | -0.66254600 |
| H | 9.96449800  | 0.72227100  | -2.66258400 |
| H | 8.51311300  | 1.06499500  | -1.68995600 |
| O | 11.34081000 | -0.03356400 | -0.39018300 |
| N | 9.20367800  | -0.81248800 | -0.13918100 |
| H | 8.21213300  | -0.66165100 | -0.35469000 |
| C | 9.57583300  | -1.84292800 | 0.81530200  |
| C | 8.96877200  | -3.20062500 | 0.45798000  |
| H | 9.19338300  | -1.59074800 | 1.81555600  |
| H | 10.66357700 | -1.89357800 | 0.86840500  |
| O | 7.76767700  | -3.30266300 | 0.16874400  |
| N | 9.81872100  | -4.24968700 | 0.53318200  |
| C | 9.35806900  | -5.62369300 | 0.40468700  |
| H | 10.79686500 | -4.07949500 | 0.77058800  |
| C | 9.65575800  | -6.39971400 | 1.69041300  |
| H | 9.89637300  | -6.12924600 | -0.40849100 |
| H | 8.29239100  | -5.62125400 | 0.17301600  |
| O | 10.77655100 | -6.30260400 | 2.21674300  |
| N | 8.65919600  | -7.16924400 | 2.17139700  |
| H | 7.73921700  | -7.13202700 | 1.71919200  |
| C | 8.82121700  | -7.95612600 | 3.38357700  |
| C | 8.49953300  | -9.43961000 | 3.15860000  |

|   |             |              |             |
|---|-------------|--------------|-------------|
| H | 8.12605400  | -7.60037000  | 4.15693000  |
| H | 9.84039600  | -7.82473300  | 3.74880900  |
| O | 7.45880200  | -9.78584600  | 2.58446900  |
| N | 9.39996100  | -10.30520200 | 3.67162500  |
| H | 10.28197000 | -9.99679000  | 4.08433800  |
| H | 12.21902000 | -6.32538400  | 3.17207600  |
| N | 13.08048100 | -6.46379800  | 3.70870200  |
| C | 14.27721600 | -6.26267700  | 3.10866700  |
| C | 12.97141700 | -7.17318100  | 4.97519100  |
| C | 14.20453400 | -5.56628800  | 1.74095300  |
| O | 15.36459500 | -6.59454300  | 3.60383200  |
| C | 12.97849900 | -8.69401800  | 4.74269000  |
| H | 12.02441200 | -6.91135200  | 5.45206300  |
| H | 13.80425300 | -6.88403400  | 5.62337400  |
| N | 14.58836200 | -4.16198600  | 1.83255600  |
| H | 14.89586200 | -6.09381800  | 1.07401700  |
| H | 13.19502300 | -5.60313800  | 1.32681500  |
| O | 11.93588800 | -9.35763400  | 4.70809100  |
| N | 14.21601400 | -9.22019000  | 4.55721000  |
| C | 13.75080700 | -3.13887100  | 1.51429600  |
| H | 15.53075000 | -3.94968900  | 2.13581800  |
| H | 15.00045200 | -8.58831200  | 4.41124800  |
| C | 14.32222100 | -1.73526200  | 1.73536100  |
| O | 12.59456300 | -3.30597600  | 1.10946700  |
| N | 13.93936100 | -0.83788700  | 0.66322800  |
| H | 13.93546400 | -1.38686100  | 2.70610200  |
| H | 15.41392900 | -1.73405000  | 1.79895500  |
| C | 14.80657800 | 0.09870700   | 0.19044300  |
| H | 12.96035300 | -0.79232800  | 0.37141500  |
| C | 14.26031200 | 0.92825500   | -0.97493700 |
| O | 15.95740100 | 0.26075500   | 0.60659700  |
| N | 14.84067700 | 2.25968000   | -0.95534400 |
| H | 14.53477200 | 0.40307900   | -1.90166100 |
| H | 13.17363200 | 1.00414800   | -0.94241000 |
| H | 15.81074600 | 2.32243700   | -0.66444300 |
| C | 14.09974500 | 3.38093300   | -1.11793100 |
| C | 14.85296100 | 4.69495800   | -0.90892700 |
| O | 12.88948900 | 3.36861200   | -1.38409200 |
| N | 14.24677100 | 5.75947100   | -1.68329100 |
| H | 14.83035800 | 4.91711200   | 0.17031500  |
| H | 15.90680400 | 4.60596200   | -1.19037700 |
| C | 14.95110300 | 6.88206100   | -1.97697000 |
| H | 13.23692900 | 5.74472300   | -1.84165200 |

|   |             |              |             |
|---|-------------|--------------|-------------|
| C | 14.20302700 | 7.89492300   | -2.84646400 |
| O | 16.12052000 | 7.07920900   | -1.62904200 |
| N | 14.70221200 | 9.22998300   | -2.56470100 |
| H | 14.38675300 | 7.62519400   | -3.89711000 |
| H | 13.12701900 | 7.85358500   | -2.67482000 |
| H | 15.67293100 | 9.29020600   | -2.27289800 |
| C | 13.90080500 | 10.31358900  | -2.48172200 |
| O | 12.68602300 | 10.32647000  | -2.70550000 |
| O | 6.23695600  | -6.66820500  | 0.79963800  |
| C | 5.05636300  | -6.59657800  | 0.41696100  |
| C | 4.65692500  | -5.57956800  | -0.65851200 |
| N | 4.05881000  | -7.37850000  | 0.87893300  |
| N | 5.09643500  | -4.24160700  | -0.29327900 |
| H | 5.14628700  | -5.89434200  | -1.59024100 |
| H | 3.57725400  | -5.56323800  | -0.81380000 |
| H | 3.10645700  | -7.22820000  | 0.53070400  |
| C | 4.28322000  | -8.40637600  | 1.88294600  |
| H | 6.09180200  | -4.07210200  | -0.13056100 |
| C | 4.23233000  | -3.21033800  | -0.16686000 |
| C | 3.98367500  | -9.80973400  | 1.33449000  |
| H | 3.60394200  | -8.24751000  | 2.73061700  |
| H | 5.31360300  | -8.33229500  | 2.23343600  |
| C | 4.84664400  | -1.89857400  | 0.33228100  |
| O | 3.01498200  | -3.29250800  | -0.38955700 |
| O | 2.87596200  | -10.08067000 | 0.85173400  |
| N | 4.99247200  | -10.69946900 | 1.44662700  |
| N | 4.43642100  | -0.76442100  | -0.47927700 |
| H | 4.49206400  | -1.76810100  | 1.36503200  |
| H | 5.93535900  | -1.94646800  | 0.34067800  |
| H | 5.90414800  | -10.43973700 | 1.82651100  |
| C | 5.33630300  | 0.09090500   | -1.00842400 |
| H | 3.43617900  | -0.57115300  | -0.59715800 |
| C | 4.75049800  | 1.24033700   | -1.83601200 |
| O | 6.56742100  | -0.01494700  | -0.87165100 |
| N | 5.25923500  | 2.52113800   | -1.36856300 |
| H | 5.05845200  | 1.07103900   | -2.87696800 |
| H | 3.66096200  | 1.25714200   | -1.78598500 |
| C | 4.43889200  | 3.51812500   | -0.96983700 |
| H | 6.27074000  | 2.67164500   | -1.34342100 |
| C | 5.14014400  | 4.76542500   | -0.42153400 |
| O | 3.20039700  | 3.45558900   | -0.99903800 |
| N | 4.62342200  | 5.97882800   | -1.03297700 |
| H | 4.94755300  | 4.77903200   | 0.66076700  |



|   |             |             |             |
|---|-------------|-------------|-------------|
| H | 6.21723400  | 4.72236400  | -0.58489900 |
| C | 5.43631600  | 6.87789000  | -1.62710900 |
| H | 3.61911900  | 6.17748900  | -0.97857100 |
| C | 4.73494100  | 8.08688500  | -2.25610600 |
| O | 6.67131400  | 6.75854200  | -1.70251300 |
| N | 5.31970500  | 9.33382700  | -1.78959900 |
| H | 4.86432400  | 7.99227400  | -3.34371900 |
| H | 3.66845100  | 8.09301400  | -2.02650800 |
| C | 4.57993600  | 10.31684100 | -1.23586500 |
| H | 6.32629500  | 9.49370100  | -1.89840100 |
| O | 3.35591100  | 10.30055900 | -1.05309500 |
| O | 1.76615700  | 0.11594100  | -0.91373700 |
| C | 0.52955500  | 0.23948700  | -0.92492000 |
| C | -0.11489800 | 1.46908200  | -1.57314600 |
| N | -0.32909700 | -0.66203500 | -0.40477800 |
| N | 0.44903800  | 2.69224700  | -1.02370800 |
| H | 0.09560200  | 1.40782700  | -2.64979300 |
| H | -1.19514700 | 1.48271500  | -1.42256700 |
| H | -1.33403200 | -0.45987600 | -0.41747000 |
| C | 0.13439100  | -1.88903500 | 0.22187300  |
| C | -0.32215200 | 3.64507900  | -0.45678700 |
| H | 1.46221000  | 2.83205300  | -1.06424100 |
| O | -3.02787500 | 0.24183700  | -0.50830200 |
| C | -0.52766000 | -3.11955500 | -0.40573500 |
| H | -0.14302500 | -1.89465600 | 1.28557200  |
| H | 1.22039900  | -1.93591700 | 0.14099000  |
| C | 0.43627100  | 4.82646000  | 0.15659900  |
| O | -1.56005800 | 3.59081900  | -0.39013300 |
| C | -4.26105100 | 0.37243400  | -0.43640900 |
| O | -1.76082800 | -3.17274400 | -0.53010200 |
| N | 0.31484100  | -4.11144100 | -0.76628600 |
| N | -0.09267500 | 6.09673500  | -0.31287900 |
| H | 0.30827500  | 4.74583500  | 1.24551300  |
| H | 1.50033200  | 4.78227100  | -0.07638400 |
| C | -4.92953300 | 1.66793300  | -0.90862800 |
| N | -5.10187400 | -0.57791300 | 0.02387900  |
| H | 1.32234800  | -3.96585200 | -0.66157200 |
| C | -0.16487800 | -5.37498100 | -1.30227300 |
| C | 0.70255400  | 7.03986700  | -0.86019000 |
| H | -1.08932600 | 6.29952600  | -0.18307200 |
| N | -4.30833100 | 2.82848500  | -0.29086100 |
| H | -4.80270500 | 1.70826100  | -1.99957700 |
| H | -5.99527900 | 1.67676300  | -0.67675600 |

|   |              |             |             |
|---|--------------|-------------|-------------|
| H | -6.10314100  | -0.36933400 | 0.08433300  |
| C | -4.62908700  | -1.88119700 | 0.46443100  |
| C | 0.30932600   | -6.55224900 | -0.44283200 |
| H | 0.24345700   | -5.53471700 | -2.30969000 |
| H | -1.25340100  | -5.33893700 | -1.36377200 |
| C | -0.01093400  | 8.30906300  | -1.33817500 |
| O | 1.93040400   | 6.91788700  | -1.00827800 |
| C | -5.02455100  | 3.73592500  | 0.40787400  |
| H | -3.29895300  | 2.96518700  | -0.39266200 |
| O | -7.80218400  | 0.34747800  | 0.16893900  |
| C | -5.30633300  | -3.00643600 | -0.32611100 |
| H | -4.89293300  | -2.03592900 | 1.51961600  |
| H | -3.54427300  | -1.91442300 | 0.35964200  |
| O | 1.51153500   | -6.67542500 | -0.15506800 |
| N | -0.65605500  | -7.41476800 | -0.06003000 |
| N | 0.61783000   | 9.50128300  | -0.79216400 |
| H | 0.05936100   | 8.31284300  | -2.43524200 |
| H | -1.06365400  | 8.30673500  | -1.05177400 |
| C | -4.20698200  | 4.85579300  | 1.06089200  |
| O | -6.25544200  | 3.68446400  | 0.55855200  |
| C | -9.02878700  | 0.48003800  | 0.30516000  |
| O | -6.54419600  | -3.06470000 | -0.39123900 |
| N | -4.47185600  | -3.89684000 | -0.90344500 |
| H | -1.62864500  | -7.21565400 | -0.31318900 |
| C | -0.36223800  | -8.60726900 | 0.71810400  |
| C | -0.07737000  | 10.43413500 | -0.10913100 |
| H | 1.62166000   | 9.65626200  | -0.93232000 |
| N | -4.74664100  | 6.16620000  | 0.73535000  |
| H | -4.26041500  | 4.68696900  | 2.14586200  |
| H | -3.16273000  | 4.81986700  | 0.74990500  |
| C | -9.69650500  | 1.83858400  | 0.07129200  |
| N | -9.87218400  | -0.52991700 | 0.61789400  |
| H | -3.46136900  | -3.75542800 | -0.81937300 |
| C | -4.96238100  | -5.04004300 | -1.65517900 |
| C | -0.70324400  | -9.88627400 | -0.06094600 |
| H | -0.97761900  | -8.61678700 | 1.62721300  |
| H | 0.69129800   | -8.58690800 | 1.00079000  |
| O | -1.29079800  | 10.41199800 | 0.13546600  |
| C | -3.97771700  | 7.14423600  | 0.21221700  |
| H | -5.72708100  | 6.36784300  | 0.95706500  |
| N | -9.00574600  | 2.90785800  | 0.77231800  |
| H | -9.66531200  | 2.01474500  | -1.01390500 |
| H | -10.73871300 | 1.83180400  | 0.39153000  |

|   |              |              |             |
|---|--------------|--------------|-------------|
| H | -10.85994600 | -0.31367100  | 0.77012400  |
| C | -9.41260800  | -1.90079000  | 0.78474300  |
| C | -4.46955800  | -6.36006400  | -1.05083200 |
| H | -4.57591000  | -5.00306700  | -2.68309800 |
| H | -6.05198200  | -4.99959600  | -1.68658800 |
| O | -1.84166700  | -10.06985300 | -0.51295900 |
| N | 0.30528100   | -10.77474000 | -0.18233800 |
| C | -4.70283400  | 8.45585800   | -0.10699800 |
| O | -2.76571400  | 7.02510700   | -0.03431900 |
| C | -9.66971100  | 3.77262600   | 1.57299900  |
| H | -8.00372800  | 3.04506600   | 0.61542100  |
| C | -10.09552000 | -2.85070300  | -0.21000400 |
| H | -9.67278700  | -2.25908500  | 1.79002600  |
| H | -8.32798100  | -1.92095000  | 0.67202100  |
| O | -3.26455800  | -6.53102600  | -0.80345400 |
| N | -5.42557700  | -7.29146600  | -0.84401200 |
| H | 1.24702500   | -10.57777200 | 0.16146400  |
| N | -4.01660100  | 9.59248500   | 0.48623300  |
| H | -4.71286100  | 8.54910500   | -1.20232600 |
| H | -5.73178600  | 8.44111400   | 0.25515000  |
| C | -8.79727500  | 4.82531500   | 2.26854500  |
| O | -10.89306700 | 3.72833200   | 1.77820000  |
| O | -11.32987400 | -2.84428000  | -0.34018800 |
| N | -9.26839500  | -3.68433200  | -0.87983400 |
| H | -6.39931100  | -7.05682200  | -1.05681800 |
| C | -5.11315200  | -8.61631900  | -0.33352100 |
| H | -3.02223100  | 9.74770700   | 0.29056400  |
| C | -4.64647500  | 10.47476400  | 1.28945100  |
| N | -9.33000300  | 6.16619600   | 2.08079300  |
| H | -8.79416400  | 4.56942000   | 3.33756600  |
| H | -7.77236500  | 4.80157700   | 1.89734000  |
| H | -8.25603100  | -3.58319300  | -0.76441200 |
| C | -9.77971100  | -4.63824800  | -1.84923600 |
| C | -5.42533700  | -9.70834100  | -1.36704000 |
| H | -5.73283000  | -8.82929300  | 0.54734800  |
| H | -4.06186400  | -8.63735300  | -0.04221100 |
| O | -5.84029900  | 10.44620500  | 1.61649100  |
| C | -8.57410000  | 7.18025000   | 1.60703200  |
| H | -10.29060000 | 6.36429900   | 2.37511200  |
| C | -9.25252000  | -6.05486500  | -1.60257200 |
| H | -9.45073800  | -4.36166000  | -2.86169100 |
| H | -10.86914800 | -4.60794600  | -1.81995300 |
| O | -6.55142700  | -9.79621800  | -1.87521000 |

|   |              |              |             |
|---|--------------|--------------|-------------|
| N | -4.41054600  | -10.55414500 | -1.64140200 |
| C | -9.30494900  | 8.51290600   | 1.41798000  |
| O | -7.37573500  | 7.07426500   | 1.29774200  |
| O | -8.04150000  | -6.26495100  | -1.42960100 |
| N | -10.19181700 | -7.02736100  | -1.63899200 |
| H | -3.47306800  | -10.42355600 | -1.25603600 |
| N | -8.55516800  | 9.61494600   | 1.99778000  |
| H | -9.41619800  | 8.65384800   | 0.33245500  |
| H | -10.29747500 | 8.49115500   | 1.86953900  |
| H | -11.17388600 | -6.75377400  | -1.72154600 |
| C | -9.84997600  | -8.43719700  | -1.54599100 |
| C | -9.13510200  | 10.53036300  | 2.80201700  |
| H | -7.56276400  | 9.73887000   | 1.77322400  |
| C | -10.05017500 | -9.17543000  | -2.88231200 |
| H | -10.50832300 | -8.92575500  | -0.81651300 |
| H | -8.81724800  | -8.52507600  | -1.20386300 |
| O | -10.32455500 | 10.55504000  | 3.14434000  |
| O | -11.11628100 | -9.08652800  | -3.50738200 |
| N | -9.01142000  | -9.94122900  | -3.27724500 |
| H | -8.11247900  | -9.93412500  | -2.79120200 |
| C | -13.36020500 | 10.07292100  | 5.04229700  |
| O | -14.39995100 | 9.76064600   | 5.62175700  |
| H | -12.04163200 | 9.88940100   | 3.47595600  |
| N | -12.97190200 | 9.62927700   | 3.81517800  |
| C | -13.75929400 | 8.65319800   | 3.09161900  |
| C | -13.10419000 | 7.26555200   | 3.10154600  |
| O | -11.89467700 | 7.14084900   | 2.86268600  |
| H | -14.75723500 | 8.62990300   | 3.53815000  |
| H | -14.91226800 | 6.36668000   | 3.50038400  |
| N | -13.92090700 | 6.21646100   | 3.35371600  |
| C | -13.45784600 | 4.84004300   | 3.31207700  |
| C | -14.38768900 | 3.97778700   | 2.45302000  |
| O | -15.60705700 | 4.16888700   | 2.43389600  |
| H | -12.43321800 | 4.82370100   | 2.94019000  |
| H | -12.73653300 | 2.97457300   | 1.72983800  |
| N | -13.75657800 | 2.97385500   | 1.78647400  |
| C | -14.49997500 | 2.01621400   | 0.99434600  |
| C | -13.79811500 | 0.65600400   | 0.98817900  |
| O | -12.56463400 | 0.57065200   | 1.08823900  |
| H | -15.51634000 | 1.95020800   | 1.39368500  |
| H | -15.60180500 | -0.29813300  | 0.67456900  |
| N | -14.60593300 | -0.41693700  | 0.83020200  |
| C | -14.08935100 | -1.76565400  | 0.67944600  |

|   |              |              |             |
|---|--------------|--------------|-------------|
| C | -14.85670000 | -2.50581900  | -0.41860500 |
| O | -16.03392000 | -2.23456200  | -0.67477700 |
| H | -13.02153200 | -1.72812000  | 0.46476500  |
| H | -13.14227500 | -3.56330500  | -0.86120900 |
| N | -14.14929500 | -3.49759200  | -1.01864300 |
| C | -14.75254000 | -4.33922600  | -2.02909800 |
| C | -14.01863900 | -5.67850500  | -2.13154500 |
| O | -12.86240400 | -5.81870800  | -1.70325200 |
| H | -15.81030700 | -4.48511700  | -1.78771900 |
| H | -15.59884200 | -6.46300100  | -3.19487800 |
| N | -14.71194000 | -6.66544300  | -2.74197300 |
| C | -14.11346900 | -7.94010200  | -3.09438400 |
| C | -14.44946000 | -8.28406400  | -4.55149500 |
| O | -15.47457200 | -7.85739000  | -5.08435500 |
| H | -12.64030200 | -9.27302700  | -4.71709600 |
| N | -13.55312100 | -9.11800100  | -5.14183800 |
| H | -13.03570100 | -7.90122100  | -2.93647000 |
| H | -14.51651200 | -8.74530500  | -2.46354800 |
| H | -14.71765700 | -3.86730100  | -3.02450100 |
| H | -14.22315300 | -2.33521000  | 1.61111700  |
| H | -14.58632000 | 2.34023900   | -0.05561800 |
| H | -13.46305500 | 4.40758900   | 4.32326900  |
| H | -13.85017800 | 8.94949400   | 2.03765400  |
| H | -13.71366000 | -9.36977700  | -6.10819900 |
| H | -9.11173900  | -10.46145400 | -4.13946800 |
| H | -4.58245300  | -11.29893900 | -2.30465500 |
| H | 0.11868400   | -11.63928300 | -0.67413300 |
| H | 4.83211900   | -11.64339600 | 1.11891300  |
| H | 9.20940300   | -11.29535100 | 3.58403200  |
| H | 14.29022500  | -10.18796100 | 4.26997500  |
| H | 14.44619900  | 11.23010000  | -2.19198500 |
| H | 9.86445800   | 11.08262900  | -1.99223600 |
| H | 5.19450000   | 11.18681400  | -0.94597700 |
| H | 0.56386400   | 11.26645900  | 0.22914000  |
| H | -3.96928600  | 11.26948400  | 1.64722200  |
| H | -8.41835700  | 11.29621100  | 3.14532500  |
| H | -12.62473000 | 10.77813800  | 5.47283500  |

7 strand parallel rippled sheet

|   |            |              |             |
|---|------------|--------------|-------------|
| O | 6.55079000 | -6.60620700  | -0.18399200 |
| C | 5.31064500 | -6.51285200  | -0.16514000 |
| C | 4.61758000 | -5.31494300  | -0.82152300 |
| N | 4.49306500 | -7.42728700  | 0.39613300  |
| N | 5.13406400 | -4.06003600  | -0.29355900 |
| H | 4.82094600 | -5.38455500  | -1.89928400 |
| H | 3.53873300 | -5.33684700  | -0.66340300 |
| H | 3.48266100 | -7.25661200  | 0.39079600  |
| C | 5.00968100 | -8.61378800  | 1.05817100  |
| H | 6.14029400 | -3.87951200  | -0.32800700 |
| C | 4.31230100 | -3.07611500  | 0.13828700  |
| C | 4.53929200 | -9.90913200  | 0.38120600  |
| H | 4.63647900 | -8.65101300  | 2.09033400  |
| H | 6.09888700 | -8.55125900  | 1.08178300  |
| C | 5.01348300 | -1.83516900  | 0.69893000  |
| O | 3.07400000 | -3.15047900  | 0.12994900  |
| O | 3.33873100 | -10.10551500 | 0.14503200  |
| N | 5.51016600 | -10.80795600 | 0.12016700  |
| N | 4.49574400 | -0.61688500  | 0.09401000  |
| H | 4.82029600 | -1.83236300  | 1.78143000  |
| H | 6.09066800 | -1.87033400  | 0.53509300  |
| H | 6.50165200 | -10.59441200 | 0.25260000  |
| C | 5.31858400 | 0.35979500   | -0.34449200 |
| H | 3.48391000 | -0.45383000  | 0.08423400  |
| C | 4.62582000 | 1.57075200   | -0.97440600 |
| O | 6.55918100 | 0.30548400   | -0.28829300 |
| N | 5.14038100 | 2.81419200   | -0.42127900 |
| H | 4.83006200 | 1.52254500   | -2.05377900 |
| H | 3.54648500 | 1.54322400   | -0.82117600 |
| C | 4.31418000 | 3.79360900   | 0.00867600  |
| H | 6.14973200 | 2.97893200   | -0.41477000 |
| C | 5.00328700 | 5.02701500   | 0.59762300  |
| O | 3.07584200 | 3.72251100   | -0.02549300 |
| N | 4.47177300 | 6.25142400   | 0.01938500  |
| H | 4.80952300 | 5.00497400   | 1.67988000  |
| H | 6.08091000 | 5.00355100   | 0.43454200  |
| C | 5.28283000 | 7.23174100   | -0.42873300 |
| H | 3.45874800 | 6.41071300   | 0.02456700  |
| C | 4.58226800 | 8.45641400   | -1.02439500 |
| O | 6.52433000 | 7.17444900   | -0.40387500 |
| N | 5.13781900 | 9.68677900   | -0.48470000 |

|   |             |             |             |
|---|-------------|-------------|-------------|
| H | 4.74340100  | 8.41187800  | -2.11118800 |
| H | 3.50954900  | 8.44001400  | -0.82794400 |
| C | 4.36586400  | 10.64995900 | 0.06003900  |
| H | 6.15003900  | 9.84323300  | -0.50373000 |
| O | 3.13341900  | 10.62644200 | 0.17396700  |
| O | 1.76794900  | 0.29085800  | 0.03155100  |
| C | 0.53094400  | 0.35031200  | 0.13725300  |
| C | -0.13882700 | 1.58457600  | 0.74668500  |
| N | -0.30932600 | -0.64252200 | -0.22511400 |
| N | 0.36076100  | 2.80815200  | 0.13992500  |
| H | -1.22233800 | 1.55404200  | 0.62745100  |
| H | 0.09662300  | 1.56984900  | 1.82085800  |
| H | -1.31972100 | -0.48280000 | -0.16980300 |
| C | 0.18174600  | -1.89202500 | -0.78584300 |
| C | -0.47454400 | 3.78134800  | -0.28524900 |
| H | 1.37041600  | 2.96940300  | 0.09814000  |
| C | -0.49449100 | -3.09443000 | -0.12228200 |
| H | 1.26542500  | -1.92209200 | -0.67052800 |
| H | -0.06097000 | -1.94884000 | -1.85680700 |
| C | 0.20203500  | 4.99746400  | -0.92464400 |
| O | -1.71197900 | 3.71833200  | -0.20840400 |
| O | -1.73141200 | -3.15269000 | -0.04045500 |
| N | 0.34043600  | -4.06202800 | 0.31704100  |
| N | -0.29174600 | 6.23712800  | -0.34518900 |
| H | 1.28523500  | 4.96488100  | -0.80646300 |
| H | -0.03825500 | 4.96002300  | -1.99699200 |
| H | 1.35005600  | -3.90077900 | 0.27659000  |
| C | -0.16020000 | -5.28041000 | 0.93687900  |
| C | 0.54430000  | 7.21594600  | 0.05906700  |
| H | -1.30240400 | 6.40648700  | -0.31440600 |
| C | 0.53230300  | -6.51177600 | 0.34799800  |
| H | -1.24127500 | -5.31949900 | 0.79889500  |
| H | 0.06060600  | -5.27822700 | 2.01376900  |
| C | -0.12800800 | 8.44975000  | 0.67132000  |
| O | 1.78334700  | 7.14813000  | -0.01098400 |
| O | 1.77312600  | -6.58399900 | 0.33008600  |
| N | -0.28918000 | -7.47962100 | -0.11209100 |
| N | 0.42270800  | 9.67941600  | 0.12669900  |
| H | -1.20527800 | 8.44269800  | 0.50068800  |
| H | 0.05800700  | 8.40089700  | 1.75380100  |
| H | -1.30001900 | -7.31328400 | -0.10666200 |
| C | 0.23004300  | -8.70316700 | -0.70047800 |
| C | -0.35085400 | 10.62595700 | -0.44404900 |

|   |             |              |             |
|---|-------------|--------------|-------------|
| H | 1.43012600  | 9.85979600   | 0.18332700  |
| C | -0.31122000 | -9.95796700  | -0.00321800 |
| H | 1.31984500  | -8.66800100  | -0.66195100 |
| H | -0.08269800 | -8.77448200  | -1.75155800 |
| O | -1.57955500 | 10.58191800  | -0.58974900 |
| O | -1.52595100 | -10.10809800 | 0.19169300  |
| N | 0.61842900  | -10.88112400 | 0.31774500  |
| H | 1.61857700  | -10.68630500 | 0.23504700  |
| H | 0.30480300  | -11.73417500 | 0.76301900  |
| H | 5.23891200  | -11.68879800 | -0.29831000 |
| H | 4.96125200  | 11.51003000  | 0.41271500  |
| H | 0.23900100  | 11.49361100  | -0.78745000 |
| O | -3.02211400 | -6.57851000  | -0.07843200 |
| C | -4.26295100 | -6.51211600  | -0.11258800 |
| C | -4.95811500 | -5.28946200  | -0.71827500 |
| N | -5.08607100 | -7.48257400  | 0.33954200  |
| N | -4.45530500 | -4.05817000  | -0.12748700 |
| H | -4.74389800 | -5.30716800  | -1.79640300 |
| H | -6.03857900 | -5.32711200  | -0.57453000 |
| H | -6.09764200 | -7.32670300  | 0.31410100  |
| C | -4.56966100 | -8.70386500  | 0.93232300  |
| H | -3.44604500 | -3.88822100  | -0.11458700 |
| C | -5.28639000 | -3.09270800  | 0.32298400  |
| C | -5.13519100 | -9.95883100  | 0.25713900  |
| H | -4.86422300 | -8.76290300  | 1.98988600  |
| H | -3.48041800 | -8.68218900  | 0.87700300  |
| C | -4.60077300 | -1.87014200  | 0.94164100  |
| O | -6.52512700 | -3.16573900  | 0.28441000  |
| O | -6.34602600 | -10.07016100 | 0.02130100  |
| N | -4.23037800 | -10.92902800 | 0.00837800  |
| N | -5.11008000 | -0.63420300  | 0.36622500  |
| H | -4.81746200 | -1.90232100  | 2.01892800  |
| H | -3.52007700 | -1.89767900  | 0.79965300  |
| H | -3.22759000 | -10.75487500 | 0.10191400  |
| C | -4.28282500 | 0.33638200   | -0.08018400 |
| H | -6.11949700 | -0.46186300  | 0.36856000  |
| C | -4.97670600 | 1.55557000   | -0.69399000 |
| O | -3.04282200 | 0.26647200   | -0.04647500 |
| N | -4.43579600 | 2.79726700   | -0.16339500 |
| H | -4.80263400 | 1.49948300   | -1.77847500 |
| H | -6.05197700 | 1.54038100   | -0.51303600 |
| C | -5.24177100 | 3.79305500   | 0.26727000  |
| H | -3.42508100 | 2.95615400   | -0.19147500 |



|   |              |             |             |
|---|--------------|-------------|-------------|
| C | -4.52621600  | 5.03201700  | 0.81352600  |
| O | -6.48180900  | 3.73323800  | 0.26533000  |
| N | -5.03854900  | 6.24820100  | 0.19957900  |
| H | -4.71325800  | 5.04734700  | 1.89700400  |
| H | -3.45046200  | 4.98428300  | 0.64365400  |
| C | -4.21265800  | 7.20857100  | -0.26684700 |
| H | -6.04852900  | 6.42343200  | 0.20027200  |
| C | -4.89776400  | 8.41720900  | -0.91243200 |
| O | -2.97266900  | 7.13967300  | -0.22862100 |
| N | -4.29559700  | 9.66369000  | -0.47109900 |
| H | -4.77455600  | 8.30076200  | -1.99911100 |
| H | -5.96397400  | 8.44063300  | -0.68442900 |
| C | -5.02432700  | 10.67504900 | 0.04391200  |
| H | -3.28431100  | 9.80606200  | -0.55719300 |
| O | -6.25100100  | 10.68537700 | 0.21429100  |
| O | -7.84782100  | 0.30979900  | 0.35491300  |
| C | -9.08361900  | 0.37580200  | 0.46010600  |
| C | -9.74903700  | 1.62154100  | 1.05308200  |
| N | -9.92611000  | -0.62513500 | 0.11424700  |
| N | -9.22123000  | 2.83642700  | 0.45169700  |
| H | -10.83031800 | 1.60767300  | 0.91450500  |
| H | -9.53538600  | 1.60495000  | 2.13205400  |
| H | -10.93242000 | -0.44745100 | 0.14293500  |
| C | -9.43277600  | -1.87069300 | -0.45656100 |
| C | -10.03263100 | 3.84408400  | 0.05549400  |
| H | -8.20802500  | 2.96946000  | 0.40127800  |
| O | -12.67479700 | 0.50570300  | 0.15346700  |
| C | -10.09430900 | -3.09946700 | 0.17797100  |
| H | -8.34895600  | -1.89544400 | -0.34137800 |
| H | -9.66892400  | -1.91399700 | -1.53000000 |
| C | -9.32075500  | 5.02187000  | -0.61796200 |
| O | -11.26895100 | 3.82480000  | 0.16538000  |
| C | -13.90476700 | 0.48075000  | -0.01139900 |
| O | -11.32624800 | -3.15728900 | 0.31617600  |
| N | -9.24660300  | -4.10026800 | 0.50957900  |
| N | -9.80237100  | 6.30555000  | -0.13179100 |
| H | -8.24249900  | 4.97589200  | -0.46575300 |
| H | -9.52361400  | 4.92621700  | -1.69514900 |
| C | -14.63849000 | 1.66957900  | -0.63051300 |
| N | -14.67137400 | -0.58452400 | 0.30618600  |
| H | -8.23888100  | -3.93966400 | 0.43404200  |
| C | -9.72322900  | -5.35754300 | 1.06916600  |
| C | -8.95089700  | 7.30560900  | 0.18489500  |

|   |              |             |             |
|---|--------------|-------------|-------------|
| H | -10.80559000 | 6.50745000  | -0.15266000 |
| N | -14.07393500 | 2.91222700  | -0.14076500 |
| H | -14.53547300 | 1.58176100  | -1.72403000 |
| H | -15.70898800 | 1.65764300  | -0.40602400 |
| H | -15.66686800 | -0.59346500 | 0.10849700  |
| C | -14.10627500 | -1.82318700 | 0.80896400  |
| C | -9.07348500  | -6.54923800 | 0.35808900  |
| H | -10.81057300 | -5.38097800 | 0.99201500  |
| H | -9.44268000  | -5.43195500 | 2.12947600  |
| C | -9.60403800  | 8.60606300  | 0.66912300  |
| O | -7.71360900  | 7.20563500  | 0.13608900  |
| C | -14.80929200 | 4.05564700  | -0.13280600 |
| H | -13.06727000 | 2.96257600  | 0.02857700  |
| C | -14.87443800 | -3.01100500 | 0.22999600  |
| H | -14.19839100 | -1.87352400 | 1.90415500  |
| H | -13.04560900 | -1.87236300 | 0.56365600  |
| O | -7.83779400  | -6.61956300 | 0.25388100  |
| N | -9.92626000  | -7.49033600 | -0.10911700 |
| N | -8.96541700  | 9.77228200  | 0.08443600  |
| H | -10.66762800 | 8.63118900  | 0.42856600  |
| H | -9.49044200  | 8.62315000  | 1.76260200  |
| C | -14.09222000 | 5.25559200  | 0.48749000  |
| O | -15.97533000 | 4.13615600  | -0.53070900 |
| O | -16.06791900 | -2.91889700 | -0.07385100 |
| N | -14.14784800 | -4.15405300 | 0.14230600  |
| H | -10.93219200 | -7.31880100 | -0.03304900 |
| C | -9.44646100  | -8.65165100 | -0.84656900 |
| C | -9.64680100  | 10.68758300 | -0.63662800 |
| H | -7.95940200  | 9.92529100  | 0.20666300  |
| N | -14.52868400 | 6.48857400  | -0.14454100 |
| H | -14.34204400 | 5.26407800  | 1.55880900  |
| H | -13.00946300 | 5.17060600  | 0.39426200  |
| H | -13.13232200 | -4.11467600 | 0.24378800  |
| C | -14.75499300 | -5.38544100 | -0.32219200 |
| C | -9.98315000  | -9.97640000 | -0.28463800 |
| H | -8.35583300  | -8.62930300 | -0.83416700 |
| H | -9.79012500  | -8.59908300 | -1.88889600 |
| O | -10.85686200 | 10.66939700 | -0.89509500 |
| C | -13.65941000 | 7.46501300  | -0.49137900 |
| H | -15.51107300 | 6.55887500  | -0.38526700 |
| C | -13.92206600 | -6.58184200 | 0.13436600  |
| H | -14.80617600 | -5.42099300 | -1.42220900 |
| H | -15.78356000 | -5.43833500 | 0.04712300  |

|   |              |              |             |
|---|--------------|--------------|-------------|
| O | -11.20131200 | -10.18142800 | -0.17986200 |
| N | -9.04274000  | -10.89347000 | 0.02377500  |
| C | -14.24494900 | 8.66667400   | -1.24156200 |
| O | -12.44404300 | 7.39865700   | -0.25720200 |
| O | -12.68466700 | -6.50490300  | 0.21314500  |
| N | -14.61610200 | -7.70517700  | 0.40908100  |
| H | -8.04485200  | -10.67239600 | 0.00178600  |
| N | -13.64282900 | 9.91205400   | -0.81691500 |
| H | -14.05299400 | 8.49193700   | -2.31020000 |
| H | -15.32500200 | 8.75121500   | -1.09153100 |
| H | -15.61838900 | -7.75312700  | 0.25033200  |
| C | -13.96899100 | -8.96539100  | 0.72204600  |
| H | -12.63140800 | 10.04753700  | -0.89828200 |
| C | -14.37135000 | 10.86131500  | -0.16825900 |
| C | -14.72628700 | -10.11068200 | 0.04193000  |
| H | -13.98676000 | -9.15319400  | 1.80552100  |
| H | -12.92643100 | -8.93568100  | 0.40550400  |
| O | -15.57564200 | 10.80002400  | 0.07779900  |
| O | -15.92666700 | -10.01776700 | -0.21581800 |
| N | -13.96354300 | -11.21499600 | -0.18262200 |
| H | -12.94866000 | -11.13314700 | -0.16563100 |
| H | -14.39893100 | -11.99197000 | -0.66239600 |
| H | -9.35521000  | -11.78668400 | 0.38262900  |
| H | -4.55884400  | -11.78391200 | -0.42221600 |
| H | -4.39814800  | 11.54298500  | 0.31400400  |
| H | -8.99268800  | 11.50248100  | -0.99340000 |
| H | -13.74729900 | 11.72928800  | 0.11630600  |
| O | 16.13875600  | -6.80944700  | -0.82418800 |
| C | 14.96750900  | -6.40315300  | -0.77211100 |
| C | 14.54168000  | -5.11369800  | -1.48997800 |
| N | 13.98456500  | -7.02385600  | -0.08271300 |
| N | 14.91258300  | -3.93142200  | -0.72039800 |
| H | 15.05239800  | -5.09656900  | -2.45866500 |
| H | 13.46050700  | -5.07574400  | -1.64180300 |
| H | 13.01297300  | -6.71199600  | -0.16791800 |
| C | 14.22405400  | -8.25016400  | 0.66370700  |
| H | 15.89815800  | -3.73695700  | -0.59579400 |
| C | 13.99959800  | -3.08308500  | -0.17733700 |
| C | 14.19389900  | -9.48230500  | -0.25771500 |
| H | 13.43403800  | -8.36888400  | 1.40803200  |
| H | 15.19625700  | -8.18521700  | 1.16347700  |
| C | 14.57338100  | -1.89857100  | 0.60483000  |
| O | 12.77799700  | -3.23768900  | -0.29070800 |

|   |             |              |             |
|---|-------------|--------------|-------------|
| O | 13.21860800 | -10.24333600 | -0.31481000 |
| N | 15.31700900 | -9.64830200  | -0.99832500 |
| N | 14.05903200 | -0.65101900  | 0.07069900  |
| H | 14.27277200 | -2.03429400  | 1.65402100  |
| H | 15.66502700 | -1.85199000  | 0.56826200  |
| H | 16.00193100 | -8.89431400  | -1.02666100 |
| C | 14.86626000 | 0.42863500   | -0.11300800 |
| H | 13.04765400 | -0.52576600  | -0.01915200 |
| C | 14.15721200 | 1.63523500   | -0.73267300 |
| O | 16.07361700 | 0.45645300   | 0.14194800  |
| N | 14.73267300 | 2.86627500   | -0.22005500 |
| H | 14.29649400 | 1.56954100   | -1.82186100 |
| H | 13.08681600 | 1.62517700   | -0.52825300 |
| C | 13.97177400 | 3.92267800   | 0.15027800  |
| H | 15.73194400 | 2.85947500   | -0.04490400 |
| C | 14.73101300 | 5.08290400   | 0.79239600  |
| O | 12.74019200 | 3.95472800   | 0.01708000  |
| N | 14.05312300 | 6.33614000   | 0.52719800  |
| H | 14.79099400 | 4.87738400   | 1.87333900  |
| H | 15.76061400 | 5.14510600   | 0.42570200  |
| C | 14.69938800 | 7.51548900   | 0.70755200  |
| H | 13.03952600 | 6.33307500   | 0.38941000  |
| C | 13.87929600 | 8.75202400   | 0.33620000  |
| O | 15.87027300 | 7.61373800   | 1.09151300  |
| N | 14.35274500 | 9.89043200   | 1.10387400  |
| H | 14.01195400 | 8.92686800   | -0.74184200 |
| H | 12.81581800 | 8.59240500   | 0.51669800  |
| C | 13.52820800 | 10.84580100  | 1.58242500  |
| H | 15.32855100 | 9.86574200   | 1.38389300  |
| O | 12.31015300 | 10.90666100  | 1.38338100  |
| O | 11.35850200 | 0.32475000   | -0.09602300 |
| C | 10.11861700 | 0.40210600   | -0.03571400 |
| C | 9.44964800  | 1.62016200   | 0.60666100  |
| N | 9.28086900  | -0.55968800  | -0.47534200 |
| N | 9.95565600  | 2.86955200   | 0.05545100  |
| H | 8.36760900  | 1.60045700   | 0.47237500  |
| H | 9.67187700  | 1.56537800   | 1.68204300  |
| H | 8.26911700  | -0.39810400  | -0.43200900 |
| C | 9.77596900  | -1.79098500  | -1.07244900 |
| C | 9.11567100  | 3.84715600   | -0.36104100 |
| H | 10.95962200 | 3.05641100   | 0.06596500  |
| C | 9.09146900  | -3.01210800  | -0.45346500 |
| H | 10.85926600 | -1.82749600  | -0.95016600 |

|   |             |              |             |
|---|-------------|--------------|-------------|
| H | 9.54385700  | -1.81031700  | -2.14680200 |
| C | 9.78703500  | 5.11328600   | -0.90479400 |
| O | 7.87981900  | 3.74973400   | -0.34081800 |
| O | 7.85464900  | -3.06226600  | -0.36755800 |
| N | 9.91533600  | -4.00498400  | -0.05069400 |
| N | 9.21663600  | 6.30558000   | -0.29847900 |
| H | 10.86237900 | 5.11109800   | -0.72482400 |
| H | 9.60905000  | 5.12071800   | -1.98936800 |
| H | 10.92657800 | -3.87956700  | -0.11549500 |
| C | 9.38956100  | -5.22993200  | 0.53005300  |
| C | 9.98371800  | 7.23974400   | 0.30399600  |
| H | 8.20642100  | 6.46609600   | -0.36773900 |
| C | 10.06497300 | -6.46030100  | -0.07252900 |
| H | 8.30965500  | -5.25209000  | 0.38398700  |
| H | 9.59300900  | -5.25874600  | 1.61082200  |
| C | 9.21203300  | 8.39868700   | 0.95110100  |
| O | 11.22207400 | 7.17658000   | 0.38619300  |
| O | 11.29537400 | -6.48475300  | -0.23350600 |
| N | 9.24592700  | -7.49252500  | -0.36103700 |
| N | 9.77602600  | 9.69581800   | 0.61532800  |
| H | 8.16392900  | 8.39106500   | 0.64898600  |
| H | 9.26670200  | 8.23669900   | 2.03693800  |
| H | 8.23519300  | -7.35652900  | -0.26512700 |
| C | 9.75020400  | -8.75749000  | -0.87327700 |
| C | 9.04682900  | 10.67247700  | 0.03155400  |
| H | 10.73146200 | 9.93395100   | 0.89358200  |
| C | 9.43079600  | -9.91982800  | 0.07887600  |
| H | 10.82339400 | -8.65722800  | -1.04349600 |
| H | 9.26170700  | -8.99112000  | -1.82811200 |
| O | 7.86337300  | 10.59529000  | -0.31821800 |
| O | 8.26268600  | -10.14552500 | 0.42925400  |
| N | 10.48308400 | -10.66722900 | 0.46865800  |
| H | 11.44998900 | -10.46646100 | 0.19286100  |
| H | 10.29588000 | -11.46294100 | 1.06636000  |
| H | 15.32503000 | -10.37217600 | -1.70581600 |
| H | 14.05441900 | 11.60558000  | 2.18839600  |
| H | 9.63239200  | 11.59723600  | -0.11292400 |

7 strand anti parallel sheet with each strand equivalent

|   |              |              |             |
|---|--------------|--------------|-------------|
| C | -14.76695400 | -12.43171600 | -0.00000700 |
| H | -15.83005600 | -12.17486500 | -0.00868000 |
| H | -14.53466000 | -13.02766400 | 0.88719100  |
| H | -14.52160000 | -13.03774700 | -0.87679900 |
| C | -10.01638200 | 12.37292600  | 0.00009000  |
| H | -11.07949700 | 12.11612700  | 0.00876200  |
| H | -9.78405800  | 12.96886200  | -0.88710800 |
| H | -9.77099900  | 12.97894500  | 0.87688100  |
| C | -5.26701000  | -12.43194700 | -0.00000300 |
| H | -6.33011300  | -12.17509600 | -0.00867600 |
| H | -5.03471600  | -13.02789500 | 0.88719500  |
| H | -5.02165600  | -13.03797800 | -0.87679400 |
| C | -0.51643900  | 12.37269500  | 0.00009400  |
| H | -1.57955400  | 12.11589500  | 0.00876600  |
| H | -0.28411500  | 12.96863100  | -0.88710400 |
| H | -0.27105600  | 12.97871400  | 0.87688500  |
| C | 4.23293300   | -12.43217900 | 0.00000100  |
| H | 3.16983000   | -12.17532800 | -0.00867200 |
| H | 4.46522700   | -13.02812700 | 0.88719900  |
| H | 4.47828700   | -13.03821000 | -0.87679000 |
| C | 8.98350500   | 12.37246300  | 0.00009800  |
| H | 7.92039000   | 12.11566400  | 0.00877000  |
| H | 9.21582900   | 12.96840000  | -0.88710000 |
| H | 9.22888800   | 12.97848200  | 0.87688900  |
| C | 13.73287600  | -12.43241000 | 0.00000500  |
| H | 12.66977400  | -12.17555900 | -0.00866800 |
| H | 13.96517000  | -13.02835800 | 0.88720300  |
| H | 13.97823000  | -13.03844100 | -0.87678600 |
| C | -13.87720600 | -11.20304800 | -0.00036700 |
| O | -12.64000200 | -11.29202100 | -0.00014900 |
| C | -9.12669400  | 11.14421500  | 0.00045000  |
| O | -7.88948500  | 11.23312800  | 0.00023400  |
| C | -4.37726300  | -11.20328000 | -0.00036300 |
| O | -3.14005800  | -11.29225300 | -0.00014500 |
| C | 0.37324900   | 11.14398300  | 0.00045400  |
| O | 1.61045800   | 11.23289600  | 0.00023800  |
| C | 5.12268100   | -11.20351100 | -0.00035800 |
| O | 6.35988500   | -11.29248400 | -0.00014100 |
| C | 9.87319300   | 11.14375200  | 0.00045800  |
| O | 11.11040100  | 11.23266500  | 0.00024200  |
| C | 14.62262400  | -11.20374200 | -0.00035400 |
| O | 15.85982800  | -11.29271500 | -0.00013700 |

|   |              |              |             |
|---|--------------|--------------|-------------|
| N | -14.50534600 | -10.00181100 | -0.00052800 |
| H | -15.52509400 | -9.94746900  | -0.00050400 |
| C | -13.74219300 | -8.76913700  | -0.00092100 |
| C | -14.67823300 | -7.56177500  | -0.00046400 |
| H | -13.08263500 | -8.71450100  | 0.87326100  |
| H | -13.08352300 | -8.71448600  | -0.87579100 |
| O | -15.91186300 | -7.69118500  | -0.00032600 |
| N | -9.75489300  | 9.94300800   | 0.00061100  |
| H | -10.77464300 | 9.88871600   | 0.00058500  |
| C | -8.99180000  | 8.71029700   | 0.00100400  |
| C | -9.92789800  | 7.50298100   | 0.00054600  |
| H | -8.33224400  | 8.65562900   | -0.87317700 |
| H | -8.33313300  | 8.65561400   | 0.87587400  |
| O | -11.16152300 | 7.63245000   | 0.00040800  |
| N | -5.00540300  | -10.00204300 | -0.00052400 |
| H | -6.02515100  | -9.94770000  | -0.00049900 |
| C | -4.24225000  | -8.76936800  | -0.00091700 |
| C | -5.17829000  | -7.56200600  | -0.00046000 |
| H | -3.58269200  | -8.71473300  | 0.87326500  |
| H | -3.58358000  | -8.71471800  | -0.87578600 |
| O | -6.41192000  | -7.69141600  | -0.00032200 |
| N | -0.25495000  | 9.94277700   | 0.00061500  |
| H | -1.27470000  | 9.88848400   | 0.00058900  |
| C | 0.50814400   | 8.71006600   | 0.00100900  |
| C | -0.42795500  | 7.50274900   | 0.00055000  |
| H | 1.16770000   | 8.65539800   | -0.87317300 |
| H | 1.16681100   | 8.65538300   | 0.87587900  |
| O | -1.66157900  | 7.63221900   | 0.00041200  |
| N | 4.49454000   | -10.00227400 | -0.00052000 |
| H | 3.47479300   | -9.94793100  | -0.00049500 |
| C | 5.25769300   | -8.76960000  | -0.00091300 |
| C | 4.32165400   | -7.56223800  | -0.00045500 |
| H | 5.91725100   | -8.71496400  | 0.87326900  |
| H | 5.91636400   | -8.71494900  | -0.87578200 |
| O | 3.08802300   | -7.69164700  | -0.00031800 |
| N | 9.24499400   | 9.94254600   | 0.00061900  |
| H | 8.22524300   | 9.88825300   | 0.00059400  |
| C | 10.00808700  | 8.70983400   | 0.00101300  |
| C | 9.07198800   | 7.50251800   | 0.00055400  |
| H | 10.66764300  | 8.65516700   | -0.87316900 |
| H | 10.66675400  | 8.65515200   | 0.87588300  |
| O | 7.83836400   | 7.63198700   | 0.00041600  |
| N | 13.99448400  | -10.00250500 | -0.00051600 |
| H | 12.97473600  | -9.94816300  | -0.00049100 |

|   |              |             |             |
|---|--------------|-------------|-------------|
| C | 14.75763700  | -8.76983100 | -0.00090900 |
| C | 13.82159700  | -7.56246900 | -0.00045100 |
| H | 15.41719500  | -8.71519600 | 0.87327400  |
| H | 15.41630700  | -8.71518100 | -0.87577800 |
| O | 12.58796700  | -7.69187900 | -0.00031400 |
| N | -14.06074900 | -6.36244800 | -0.00030800 |
| H | -13.04136700 | -6.30163700 | -0.00039800 |
| C | -14.83170700 | -5.13464000 | 0.00017000  |
| C | -13.90334600 | -3.92136400 | -0.00031200 |
| H | -15.49165600 | -5.08416500 | -0.87396700 |
| H | -15.49065400 | -5.08419500 | 0.87508400  |
| O | -12.66892000 | -4.04294400 | -0.00053400 |
| N | -9.31047300  | 6.30362300  | 0.00039200  |
| H | -8.29109300  | 6.24276300  | 0.00048200  |
| C | -10.08149100 | 5.07585300  | -0.00008800 |
| C | -9.15318900  | 3.86253200  | 0.00039500  |
| H | -10.74144300 | 5.02541000  | 0.87404900  |
| H | -10.74044000 | 5.02544000  | -0.87500300 |
| O | -7.91875700  | 3.98405200  | 0.00061800  |
| N | -4.56080600  | -6.36267900 | -0.00030400 |
| H | -3.54142300  | -6.30186800 | -0.00039400 |
| C | -5.33176400  | -5.13487200 | 0.00017500  |
| C | -4.40340300  | -3.92159500 | -0.00030800 |
| H | -5.99171200  | -5.08439600 | -0.87396300 |
| H | -5.99071100  | -5.08442600 | 0.87508900  |
| O | -3.16897700  | -4.04317600 | -0.00053000 |
| N | 0.18947000   | 6.30339200  | 0.00039600  |
| H | 1.20885000   | 6.24253100  | 0.00048600  |
| C | -0.58154800  | 5.07562200  | -0.00008400 |
| C | 0.34675400   | 3.86230000  | 0.00040000  |
| H | -1.24149900  | 5.02517900  | 0.87405300  |
| H | -1.24049600  | 5.02520900  | -0.87499800 |
| O | 1.58118700   | 3.98382000  | 0.00062200  |
| N | 4.93913800   | -6.36291100 | -0.00030000 |
| H | 5.95852000   | -6.30210000 | -0.00038900 |
| C | 4.16817900   | -5.13510300 | 0.00017900  |
| C | 5.09654000   | -3.92182700 | -0.00030400 |
| H | 3.50823100   | -5.08462800 | -0.87395900 |
| H | 3.50923200   | -5.08465800 | 0.87509300  |
| O | 6.33096700   | -4.04340700 | -0.00052500 |
| N | 9.68941400   | 6.30316100  | 0.00040000  |
| H | 10.70879300  | 6.24230000  | 0.00049000  |
| C | 8.91839600   | 5.07539100  | -0.00008000 |
| C | 9.84669800   | 3.86206900  | 0.00040400  |



|   |              |             |             |
|---|--------------|-------------|-------------|
| H | 8.25844400   | 5.02494700  | 0.87405700  |
| H | 8.25944700   | 5.02497700  | -0.87499400 |
| O | 11.08113000  | 3.98358900  | 0.00062600  |
| N | 14.43908100  | -6.36314200 | -0.00029600 |
| H | 15.45846300  | -6.30233100 | -0.00038500 |
| C | 13.66812300  | -5.13533400 | 0.00018300  |
| C | 14.59648400  | -3.92205800 | -0.00030000 |
| H | 13.00817400  | -5.08485900 | -0.87395500 |
| H | 13.00917600  | -5.08488900 | 0.87509700  |
| O | 15.83091000  | -4.04363800 | -0.00052100 |
| N | -14.52842700 | -2.72597800 | -0.00039200 |
| H | -15.54817500 | -2.67163600 | -0.00023400 |
| C | -13.76527400 | -1.49330400 | -0.00088500 |
| C | -14.70131400 | -0.28594200 | -0.00030600 |
| H | -13.10560200 | -1.43866800 | 0.87321100  |
| H | -13.10671700 | -1.43865400 | -0.87584000 |
| O | -15.93494400 | -0.41535200 | -0.00000800 |
| N | -9.77832800  | 2.66717700  | 0.00047500  |
| H | -10.79807800 | 2.61288400  | 0.00031600  |
| C | -9.01523500  | 1.43446500  | 0.00096800  |
| C | -9.95133300  | 0.22714900  | 0.00038800  |
| H | -8.35556500  | 1.37979700  | -0.87312800 |
| H | -8.35668200  | 1.37978300  | 0.87592400  |
| O | -11.18495700 | 0.35661900  | 0.00008900  |
| N | -5.02848400  | -2.72621000 | -0.00038800 |
| H | -6.04823100  | -2.67186700 | -0.00023000 |
| C | -4.26533100  | -1.49353600 | -0.00088100 |
| C | -5.20137000  | -0.28617400 | -0.00030200 |
| H | -3.60565900  | -1.43890000 | 0.87321600  |
| H | -3.60677400  | -1.43888500 | -0.87583600 |
| O | -6.43500100  | -0.41558300 | -0.00000400 |
| N | -0.27838500  | 2.66694500  | 0.00047900  |
| H | -1.29813500  | 2.61265300  | 0.00032000  |
| C | 0.48470900   | 1.43423400  | 0.00097200  |
| C | -0.45139000  | 0.22691800  | 0.00039300  |
| H | 1.14437800   | 1.37956600  | -0.87312300 |
| H | 1.14326200   | 1.37955200  | 0.87592800  |
| O | -1.68501400  | 0.35638700  | 0.00009300  |
| N | 4.47146000   | -2.72644100 | -0.00038400 |
| H | 3.45171200   | -2.67209900 | -0.00022600 |
| C | 5.23461300   | -1.49376700 | -0.00087600 |
| C | 4.29857300   | -0.28640500 | -0.00029800 |
| H | 5.89428500   | -1.43913100 | 0.87322000  |
| H | 5.89316900   | -1.43911700 | -0.87583200 |

|   |              |             |             |
|---|--------------|-------------|-------------|
| O | 3.06494300   | -0.41581400 | 0.00000100  |
| N | 9.22155900   | 2.66671400  | 0.00048300  |
| H | 8.20180800   | 2.61242100  | 0.00032500  |
| C | 9.98465200   | 1.43400300  | 0.00097600  |
| C | 9.04855300   | 0.22668600  | 0.00039700  |
| H | 10.64432200  | 1.37933500  | -0.87311900 |
| H | 10.64320500  | 1.37932000  | 0.87593200  |
| O | 7.81492900   | 0.35615600  | 0.00009700  |
| N | 13.97140300  | -2.72667200 | -0.00037900 |
| H | 12.95165500  | -2.67233000 | -0.00022200 |
| C | 14.73455600  | -1.49399800 | -0.00087200 |
| C | 13.79851600  | -0.28663600 | -0.00029300 |
| H | 15.39422800  | -1.43936200 | 0.87322400  |
| H | 15.39311300  | -1.43934800 | -0.87582800 |
| O | 12.56488600  | -0.41604600 | 0.00000500  |
| N | -14.08383000 | 0.91338500  | -0.00023200 |
| H | -13.06444700 | 0.97419600  | -0.00045400 |
| C | -14.85478800 | 2.14119300  | 0.00034700  |
| C | -13.92642700 | 3.35446900  | -0.00025700 |
| H | -15.51485000 | 2.19166800  | -0.87370400 |
| H | -15.51362100 | 2.19163800  | 0.87534700  |
| O | -12.69200000 | 3.23288900  | -0.00063900 |
| N | -9.33390800  | -0.97220800 | 0.00031500  |
| H | -8.31452800  | -1.03306900 | 0.00053800  |
| C | -10.10492600 | -2.19997800 | -0.00026500 |
| C | -9.17662400  | -3.41330000 | 0.00034000  |
| H | -10.76499100 | -2.25042100 | 0.87378600  |
| H | -10.76376000 | -2.25039200 | -0.87526500 |
| O | -7.94219200  | -3.29178000 | 0.00072300  |
| N | -4.58388600  | 0.91315400  | -0.00022700 |
| H | -3.56450400  | 0.97396500  | -0.00045000 |
| C | -5.35484500  | 2.14096100  | 0.00035100  |
| C | -4.42648400  | 3.35423700  | -0.00025300 |
| H | -6.01490700  | 2.19143600  | -0.87370000 |
| H | -6.01367700  | 2.19140700  | 0.87535100  |
| O | -3.19205700  | 3.23265700  | -0.00063500 |
| N | 0.16603500   | -0.97244000 | 0.00031900  |
| H | 1.18541500   | -1.03330000 | 0.00054200  |
| C | -0.60498300  | -2.20021000 | -0.00026100 |
| C | 0.32331900   | -3.41353100 | 0.00034400  |
| H | -1.26504800  | -2.25065300 | 0.87379000  |
| H | -1.26381700  | -2.25062300 | -0.87526100 |
| O | 1.55775200   | -3.29201100 | 0.00072700  |
| N | 4.91605700   | 0.91292200  | -0.00022300 |

|   |              |             |             |
|---|--------------|-------------|-------------|
| H | 5.93543900   | 0.97373300  | -0.00044500 |
| C | 4.14509900   | 2.14073000  | 0.00035600  |
| C | 5.07346000   | 3.35400600  | -0.00024900 |
| H | 3.48503700   | 2.19120500  | -0.87369600 |
| H | 3.48626600   | 2.19117500  | 0.87535500  |
| O | 6.30788600   | 3.23242600  | -0.00063100 |
| N | 9.66597900   | -0.97267100 | 0.00032300  |
| H | 10.68535800  | -1.03353200 | 0.00054600  |
| C | 8.89496100   | -2.20044100 | -0.00025700 |
| C | 9.82326300   | -3.41376300 | 0.00034800  |
| H | 8.23489500   | -2.25088400 | 0.87379500  |
| H | 8.23612600   | -2.25085500 | -0.87525700 |
| O | 11.05769500  | -3.29224300 | 0.00073200  |
| N | 14.41600000  | 0.91269100  | -0.00021900 |
| H | 15.43538300  | 0.97350200  | -0.00044100 |
| C | 13.64504200  | 2.14049800  | 0.00036000  |
| C | 14.57340300  | 3.35377500  | -0.00024400 |
| H | 12.98498000  | 2.19097400  | -0.87369200 |
| H | 12.98620900  | 2.19094400  | 0.87535900  |
| O | 15.80783000  | 3.23219500  | -0.00062700 |
| N | -14.55150800 | 4.54985400  | -0.00025600 |
| H | -15.57125500 | 4.60419700  | 0.00003500  |
| C | -13.78835500 | 5.78252900  | -0.00084800 |
| C | -14.72439400 | 6.98989100  | -0.00014800 |
| H | -13.12856900 | 5.83716500  | 0.87316200  |
| H | -13.12991200 | 5.83717800  | -0.87589000 |
| O | -15.95802500 | 6.86048100  | 0.00031100  |
| N | -9.80176300  | -4.60865500 | 0.00033800  |
| H | -10.82151300 | -4.66294800 | 0.00004700  |
| C | -9.03867000  | -5.84136600 | 0.00093200  |
| C | -9.97476800  | -7.04868300 | 0.00023100  |
| H | -8.37888600  | -5.89603500 | -0.87307800 |
| H | -8.38023100  | -5.89604800 | 0.87597300  |
| O | -11.20839200 | -6.91921300 | -0.00022900 |
| N | -5.05156400  | 4.54962300  | -0.00025100 |
| H | -6.07131200  | 4.60396500  | 0.00003900  |
| C | -4.28841100  | 5.78229700  | -0.00084400 |
| C | -5.22445100  | 6.98965900  | -0.00014400 |
| H | -3.62862600  | 5.83693400  | 0.87316600  |
| H | -3.62996900  | 5.83694700  | -0.87588500 |
| O | -6.45808100  | 6.86025000  | 0.00031500  |
| N | -0.30181900  | -4.60888600 | 0.00034200  |
| H | -1.32157000  | -4.66317900 | 0.00005100  |
| C | 0.46127300   | -5.84159800 | 0.00093600  |

|   |              |              |             |
|---|--------------|--------------|-------------|
| C | -0.47482500  | -7.04891400  | 0.00023500  |
| H | 1.12105700   | -5.89626600  | -0.87307400 |
| H | 1.11971200   | -5.89628000  | 0.87597800  |
| O | -1.70844900  | -6.91944500  | -0.00022500 |
| N | 4.44837900   | 4.54939200   | -0.00024700 |
| H | 3.42863100   | 4.60373400   | 0.00004300  |
| C | 5.21153200   | 5.78206600   | -0.00084000 |
| C | 4.27549200   | 6.98942800   | -0.00014000 |
| H | 5.87131800   | 5.83670200   | 0.87317000  |
| H | 5.86997500   | 5.83671600   | -0.87588100 |
| O | 3.04186200   | 6.86001800   | 0.00031900  |
| N | 9.19812400   | -4.60911800  | 0.00034700  |
| H | 8.17837300   | -4.66341000  | 0.00005500  |
| C | 9.96121700   | -5.84182900  | 0.00094000  |
| C | 9.02511800   | -7.04914500  | 0.00023900  |
| H | 10.62100100  | -5.89649800  | -0.87307000 |
| H | 10.61965600  | -5.89651100  | 0.87598200  |
| O | 7.79149400   | -6.91967600  | -0.00022100 |
| N | 13.94832200  | 4.54916000   | -0.00024300 |
| H | 12.92857500  | 4.60350300   | 0.00004700  |
| C | 14.71147600  | 5.78183400   | -0.00083600 |
| C | 13.77543600  | 6.98919600   | -0.00013600 |
| H | 15.37126100  | 5.83647100   | 0.87317400  |
| H | 15.36991800  | 5.83648400   | -0.87587700 |
| O | 12.54180500  | 6.85978700   | 0.00032300  |
| N | -14.10691000 | 8.18921800   | -0.00015500 |
| H | -13.08752800 | 8.25002900   | -0.00051000 |
| C | -14.87786800 | 9.41702500   | 0.00052400  |
| C | -13.94950800 | 10.63030200  | -0.00020200 |
| H | -15.53804400 | 9.46750000   | -0.87344200 |
| H | -15.53658700 | 9.46747100   | 0.87561000  |
| O | -12.71508100 | 10.50872100  | -0.00074400 |
| N | -9.35734300  | -8.24804000  | 0.00023800  |
| H | -8.33796300  | -8.30890100  | 0.00059400  |
| C | -10.12836100 | -9.47581000  | -0.00044200 |
| C | -9.20005900  | -10.68913200 | 0.00028500  |
| H | -10.78854000 | -9.52625300  | 0.87352300  |
| H | -10.78708100 | -9.52622400  | -0.87552800 |
| O | -7.96562700  | -10.56761100 | 0.00082900  |
| N | -4.60696700  | 8.18898600   | -0.00015100 |
| H | -3.58758500  | 8.24979700   | -0.00050600 |
| C | -5.37792500  | 9.41679400   | 0.00052800  |
| C | -4.44956400  | 10.63007000  | -0.00019700 |
| H | -6.03810100  | 9.46726900   | -0.87343800 |

|   |              |              |             |
|---|--------------|--------------|-------------|
| H | -6.03664400  | 9.46724000   | 0.87561400  |
| O | -3.21513800  | 10.50849000  | -0.00074000 |
| N | 0.14260000   | -8.24827100  | 0.00024200  |
| H | 1.16198000   | -8.30913200  | 0.00059800  |
| C | -0.62841800  | -9.47604100  | -0.00043800 |
| C | 0.29988400   | -10.68936300 | 0.00028900  |
| H | -1.28859700  | -9.52648400  | 0.87352800  |
| H | -1.28713800  | -9.52645500  | -0.87552400 |
| O | 1.53431700   | -10.56784300 | 0.00083300  |
| N | 4.89297600   | 8.18875500   | -0.00014600 |
| H | 5.91235900   | 8.24956600   | -0.00050100 |
| C | 4.12201800   | 9.41656300   | 0.00053200  |
| C | 5.05037900   | 10.62983900  | -0.00019300 |
| H | 3.46184200   | 9.46703700   | -0.87343300 |
| H | 3.46329900   | 9.46700900   | 0.87561800  |
| O | 6.28480600   | 10.50825900  | -0.00073600 |
| N | 9.64254400   | -8.24850300  | 0.00024600  |
| H | 10.66192300  | -8.30936300  | 0.00060200  |
| C | 8.87152600   | -9.47627300  | -0.00043300 |
| C | 9.79982800   | -10.68959400 | 0.00029300  |
| H | 8.21134700   | -9.52671500  | 0.87353200  |
| H | 8.21280500   | -9.52668700  | -0.87552000 |
| O | 11.03426000  | -10.56807400 | 0.00083700  |
| N | 14.39292000  | 8.18852400   | -0.00014200 |
| H | 15.41230200  | 8.24933500   | -0.00049700 |
| C | 13.62196200  | 9.41633100   | 0.00053600  |
| C | 14.55032200  | 10.62960800  | -0.00018900 |
| H | 12.96178600  | 9.46680600   | -0.87342900 |
| H | 12.96324300  | 9.46677700   | 0.87562200  |
| O | 15.78474900  | 10.50802700  | -0.00073200 |
| N | -14.57458800 | 11.82568700  | -0.00011900 |
| H | -15.59433600 | 11.88003000  | 0.00030400  |
| C | -13.81143500 | 13.05836100  | -0.00081200 |
| H | -13.18088500 | 13.13820200  | 0.89263400  |
| H | -13.16013800 | 13.12253100  | -0.88022900 |
| N | -9.82519800  | -11.88448700 | 0.00020200  |
| H | -10.83627600 | -12.02787200 | -0.00038200 |
| C | -8.95708600  | -13.04563700 | 0.00106300  |
| H | -8.32190700  | -13.07006700 | -0.89233700 |
| H | -8.30273300  | -13.05247400 | 0.88052600  |
| N | -5.07464500  | 11.82545600  | -0.00011500 |
| H | -6.09439200  | 11.87979800  | 0.00030800  |
| C | -4.31149200  | 13.05813000  | -0.00080800 |
| H | -3.68094200  | 13.13797100  | 0.89263800  |

|   |              |              |             |
|---|--------------|--------------|-------------|
| H | -3.66019500  | 13.12229900  | -0.88022500 |
| N | -0.32525400  | -11.88471800 | 0.00020600  |
| H | -1.34500500  | -11.93901100 | -0.00021800 |
| C | 0.43783800   | -13.11742900 | 0.00089900  |
| H | 1.06838500   | -13.19730100 | -0.89254600 |
| H | 1.08913200   | -13.18163000 | 0.88031700  |
| N | 4.42529900   | 11.82522400  | -0.00011100 |
| H | 3.40555100   | 11.87956700  | 0.00031200  |
| C | 5.18845200   | 13.05789900  | -0.00080400 |
| H | 5.81900200   | 13.13773900  | 0.89264300  |
| H | 5.83974900   | 13.12206800  | -0.88022100 |
| N | 9.17468900   | -11.88494900 | 0.00021000  |
| H | 8.15493900   | -11.93924200 | -0.00021400 |
| C | 9.93778200   | -13.11766100 | 0.00090400  |
| H | 10.56832900  | -13.19753200 | -0.89254200 |
| H | 10.58907500  | -13.18186200 | 0.88032100  |
| N | 13.92524200  | 11.82499300  | -0.00010700 |
| H | 12.90549400  | 11.87933600  | 0.00031600  |
| C | 14.68839500  | 13.05766700  | -0.00080000 |
| H | 15.31894500  | 13.13750800  | 0.89264700  |
| H | 15.33969200  | 13.12183600  | -0.88021700 |
| H | -14.50618000 | 13.90277700  | -0.01624900 |
| H | -9.57526000  | -13.94761700 | 0.01654200  |
| H | -5.00623700  | 13.90254600  | -0.01624500 |
| H | -0.25694800  | -13.96181200 | 0.01633600  |
| H | 4.49370700   | 13.90231500  | -0.01624100 |
| H | 9.24299600   | -13.96204300 | 0.01634000  |
| H | 13.99365000  | 13.90208300  | -0.01623600 |

7 strand parallel sheet with each strand equivalent

|   |              |              |             |
|---|--------------|--------------|-------------|
| H | -15.65774500 | -11.88320400 | 0.69294600  |
| C | -14.56613400 | -11.89419500 | 0.73685400  |
| H | -14.24017200 | -11.93457600 | 1.78209600  |
| H | -14.17899600 | -12.78809000 | 0.23715600  |
| H | -10.83341800 | -11.86685700 | 0.69076800  |
| C | -9.74180600  | -11.87784800 | 0.73467600  |
| H | -9.41584400  | -11.91822800 | 1.77991800  |
| H | -9.35466800  | -12.77174300 | 0.23497800  |
| H | -6.00909000  | -11.85050900 | 0.68859000  |
| C | -4.91747800  | -11.86150000 | 0.73249800  |
| H | -4.59151700  | -11.90188100 | 1.77774000  |
| H | -4.53034000  | -12.75539500 | 0.23280000  |
| H | -1.18476200  | -11.83416200 | 0.68641200  |
| C | -0.09315000  | -11.84515300 | 0.73032000  |
| H | 0.23281100   | -11.88553400 | 1.77556100  |
| H | 0.29398700   | -12.73904800 | 0.23062200  |
| H | 3.63956600   | -11.81781400 | 0.68423300  |
| C | 4.73117700   | -11.82880600 | 0.72814200  |
| H | 5.05713900   | -11.86918600 | 1.77338300  |
| H | 5.11831500   | -12.72270000 | 0.22844300  |
| C | 9.55550500   | -11.81245800 | 0.72596300  |
| H | 8.46389300   | -11.80146700 | 0.68205500  |
| H | 9.88146700   | -11.85283900 | 1.77120500  |
| H | 9.94264300   | -12.70635300 | 0.22626500  |
| H | 13.28822100  | -11.78512000 | 0.67987700  |
| C | 14.37983300  | -11.79611100 | 0.72378500  |
| H | 14.70579400  | -11.83649100 | 1.76902700  |
| H | 14.76697100  | -12.69000500 | 0.22408700  |
| C | -13.93814100 | -10.66864500 | 0.09158400  |
| O | -12.70651500 | -10.56267700 | -0.01213400 |
| C | -9.11381300  | -10.65229700 | 0.08940600  |
| O | -7.88218700  | -10.54632900 | -0.01431200 |
| C | -4.28948500  | -10.63595000 | 0.08722800  |
| O | -3.05786000  | -10.52998200 | -0.01649000 |
| C | 0.53484300   | -10.61960200 | 0.08505000  |
| O | 1.76646800   | -10.51363400 | -0.01866800 |
| C | 5.35917000   | -10.60325500 | 0.08287200  |
| O | 6.59079600   | -10.49728700 | -0.02084600 |
| C | 10.18349800  | -10.58690800 | 0.08069400  |
| O | 11.41512400  | -10.48093900 | -0.02302400 |
| C | 15.00782600  | -10.57056000 | 0.07851600  |
| O | 16.23945100  | -10.46459200 | -0.02520300 |

|   |              |             |             |
|---|--------------|-------------|-------------|
| N | -14.80817900 | -9.71704800 | -0.33391300 |
| H | -15.81190700 | -9.89291000 | -0.26213400 |
| C | -14.35131200 | -8.47401700 | -0.93644700 |
| C | -15.00530300 | -7.26396300 | -0.26126800 |
| H | -13.26327400 | -8.43839300 | -0.86675600 |
| H | -14.63979000 | -8.43749400 | -1.99655500 |
| O | -16.23961300 | -7.18615100 | -0.16586800 |
| N | -9.98385200  | -9.70070000 | -0.33609100 |
| H | -10.98757900 | -9.87656200 | -0.26431200 |
| C | -9.52698500  | -8.45767000 | -0.93862500 |
| C | -10.18097500 | -7.24761500 | -0.26344700 |
| H | -8.43894600  | -8.42204600 | -0.86893400 |
| H | -9.81546200  | -8.42114600 | -1.99873300 |
| O | -11.41528500 | -7.16980400 | -0.16804600 |
| N | -5.15952400  | -9.68435300 | -0.33826900 |
| H | -6.16325200  | -9.86021500 | -0.26649000 |
| C | -4.70265700  | -8.44132200 | -0.94080300 |
| C | -5.35664700  | -7.23126800 | -0.26562500 |
| H | -3.61461800  | -8.40569900 | -0.87111200 |
| H | -4.99113400  | -8.40479900 | -2.00091100 |
| O | -6.59095700  | -7.15345700 | -0.17022400 |
| N | -0.33519600  | -9.66800500 | -0.34044700 |
| H | -1.33892400  | -9.84386700 | -0.26866800 |
| C | 0.12167100   | -8.42497500 | -0.94298200 |
| C | -0.53231900  | -7.21492000 | -0.26780300 |
| H | 1.20970900   | -8.38935100 | -0.87329000 |
| H | -0.16680600  | -8.38845100 | -2.00309000 |
| O | -1.76663000  | -7.13710900 | -0.17240200 |
| N | 4.48913200   | -9.65165800 | -0.34262500 |
| H | 3.48540400   | -9.82752000 | -0.27084600 |
| C | 4.94599900   | -8.40862700 | -0.94516000 |
| C | 4.29200800   | -7.19857300 | -0.26998100 |
| H | 6.03403700   | -8.37300400 | -0.87546800 |
| H | 4.65752100   | -8.37210400 | -2.00526800 |
| O | 3.05769800   | -7.12076200 | -0.17458000 |
| N | 9.31345900   | -9.63531000 | -0.34480300 |
| H | 8.30973200   | -9.81117200 | -0.27302500 |
| C | 9.77032600   | -8.39228000 | -0.94733800 |
| C | 9.11633600   | -7.18222500 | -0.27215900 |
| H | 10.85836500  | -8.35665600 | -0.87764600 |
| H | 9.48184900   | -8.35575600 | -2.00744600 |
| O | 7.88202600   | -7.10441400 | -0.17675800 |
| N | 14.13778700  | -9.61896300 | -0.34698200 |
| H | 13.13405900  | -9.79482500 | -0.27520300 |



|   |              |             |             |
|---|--------------|-------------|-------------|
| C | 14.59465400  | -8.37593200 | -0.94951600 |
| C | 13.94066400  | -7.16587800 | -0.27433700 |
| H | 15.68269300  | -8.34030900 | -0.87982500 |
| H | 14.30617700  | -8.33940900 | -2.00962400 |
| O | 12.70635400  | -7.08806700 | -0.17893600 |
| N | -14.15130800 | -6.31326400 | 0.18151300  |
| H | -13.14533700 | -6.47382200 | 0.10540900  |
| C | -14.62456600 | -5.08935800 | 0.80998700  |
| C | -13.98786900 | -3.85672900 | 0.15956800  |
| H | -15.71305800 | -5.06722200 | 0.74180400  |
| H | -14.33557900 | -5.07084000 | 1.87042400  |
| O | -12.75483500 | -3.76004100 | 0.06494300  |
| N | -9.32698100  | -6.29691700 | 0.17933400  |
| H | -8.32100900  | -6.45747500 | 0.10323100  |
| C | -9.80023800  | -5.07301000 | 0.80780900  |
| C | -9.16354200  | -3.84038100 | 0.15739000  |
| H | -10.88873000 | -5.05087400 | 0.73962600  |
| H | -9.51125100  | -5.05449300 | 1.86824500  |
| O | -7.93050700  | -3.74369400 | 0.06276400  |
| N | -4.50265300  | -6.28057000 | 0.17715600  |
| H | -3.49668100  | -6.44112800 | 0.10105300  |
| C | -4.97591100  | -5.05666300 | 0.80563100  |
| C | -4.33921400  | -3.82403400 | 0.15521200  |
| H | -6.06440300  | -5.03452700 | 0.73744800  |
| H | -4.68692400  | -5.03814500 | 1.86606700  |
| O | -3.10617900  | -3.72734600 | 0.06058600  |
| N | 0.32167500   | -6.26422200 | 0.17497800  |
| H | 1.32764600   | -6.42478000 | 0.09887400  |
| C | -0.15158300  | -5.04031500 | 0.80345300  |
| C | 0.48511400   | -3.80768600 | 0.15303400  |
| H | -1.24007500  | -5.01817900 | 0.73527000  |
| H | 0.13740400   | -5.02179800 | 1.86388900  |
| O | 1.71814900   | -3.71099900 | 0.05840800  |
| N | 5.14600300   | -6.24787500 | 0.17280000  |
| H | 6.15197400   | -6.40843300 | 0.09669600  |
| C | 4.67274500   | -5.02396800 | 0.80127400  |
| C | 5.30944200   | -3.79133900 | 0.15085600  |
| H | 3.58425300   | -5.00183200 | 0.73309100  |
| H | 4.96173200   | -5.00545000 | 1.86171100  |
| O | 6.54247600   | -3.69465100 | 0.05623000  |
| N | 9.97033000   | -6.23152700 | 0.17062200  |
| H | 10.97630200  | -6.39208500 | 0.09451800  |
| C | 9.49707300   | -5.00762100 | 0.79909600  |
| C | 10.13376900  | -3.77499200 | 0.14867700  |

|   |              |             |             |
|---|--------------|-------------|-------------|
| H | 8.40858100   | -4.98548400 | 0.73091300  |
| H | 9.78606000   | -4.98910300 | 1.85953300  |
| O | 11.36680400  | -3.67830400 | 0.05405200  |
| N | 14.79465800  | -6.21518000 | 0.16844400  |
| H | 15.80063000  | -6.37573800 | 0.09234000  |
| C | 14.32140000  | -4.99127300 | 0.79691800  |
| C | 14.95809700  | -3.75864400 | 0.14649900  |
| H | 13.23290800  | -4.96913700 | 0.72873500  |
| H | 14.61038700  | -4.97275600 | 1.85735500  |
| O | 16.19113200  | -3.66195600 | 0.05187400  |
| N | -14.85523600 | -2.90886600 | -0.26282900 |
| H | -15.85883900 | -3.08474400 | -0.18936900 |
| C | -14.39939900 | -1.66583400 | -0.86614100 |
| C | -15.05228000 | -0.45578300 | -0.18988300 |
| H | -13.31124600 | -1.63019100 | -0.79827000 |
| H | -14.68965000 | -1.62932800 | -1.92576500 |
| O | -16.28643000 | -0.37799200 | -0.09241900 |
| N | -10.03090800 | -2.89251800 | -0.26500700 |
| H | -11.03451200 | -3.06839700 | -0.19154800 |
| C | -9.57507100  | -1.64948700 | -0.86831900 |
| C | -10.22795200 | -0.43943600 | -0.19206100 |
| H | -8.48691800  | -1.61384400 | -0.80044800 |
| H | -9.86532200  | -1.61298000 | -1.92794400 |
| O | -11.46210300 | -0.36164500 | -0.09459700 |
| N | -5.20658100  | -2.87617100 | -0.26718500 |
| H | -6.21018400  | -3.05204900 | -0.19372600 |
| C | -4.75074400  | -1.63313900 | -0.87049700 |
| C | -5.40362500  | -0.42308800 | -0.19423900 |
| H | -3.66259100  | -1.59749600 | -0.80262600 |
| H | -5.04099400  | -1.59663300 | -1.93012200 |
| O | -6.63777500  | -0.34529800 | -0.09677500 |
| N | -0.38225300  | -2.85982400 | -0.26936300 |
| H | -1.38585600  | -3.03570200 | -0.19590400 |
| C | 0.07358400   | -1.61679200 | -0.87267500 |
| C | -0.57929700  | -0.40674100 | -0.19641800 |
| H | 1.16173700   | -1.58114900 | -0.80480400 |
| H | -0.21666700  | -1.58028600 | -1.93230000 |
| O | -1.81344700  | -0.32895000 | -0.09895300 |
| N | 4.44207500   | -2.84347600 | -0.27154200 |
| H | 3.43847200   | -3.01935500 | -0.19808200 |
| C | 4.89791200   | -1.60044500 | -0.87485400 |
| C | 4.24503100   | -0.39039400 | -0.19859600 |
| H | 5.98606500   | -1.56480100 | -0.80698200 |
| H | 4.60766100   | -1.56393800 | -1.93447800 |

|   |              |             |             |
|---|--------------|-------------|-------------|
| O | 3.01088100   | -0.31260300 | -0.10113100 |
| N | 9.26640300   | -2.82712900 | -0.27372000 |
| H | 8.26279900   | -3.00300700 | -0.20026000 |
| C | 9.72224000   | -1.58409700 | -0.87703200 |
| C | 9.06935900   | -0.37404600 | -0.20077400 |
| H | 10.81039300  | -1.54845400 | -0.80916100 |
| H | 9.43198900   | -1.54759100 | -1.93665600 |
| O | 7.83520800   | -0.29625500 | -0.10330900 |
| N | 14.09073000  | -2.81078100 | -0.27589800 |
| H | 13.08712700  | -2.98666000 | -0.20243800 |
| C | 14.54656700  | -1.56775000 | -0.87921000 |
| C | 13.89368600  | -0.35769900 | -0.20295200 |
| H | 15.63472000  | -1.53210600 | -0.81133900 |
| H | 14.25631700  | -1.53124300 | -1.93883400 |
| O | 12.65953600  | -0.27990800 | -0.10548800 |
| N | -14.19756300 | 0.49493500  | 0.25145800  |
| H | -13.19171700 | 0.33439300  | 0.17367400  |
| C | -14.66979000 | 1.71884000  | 0.88070900  |
| C | -14.03420300 | 2.95147300  | 0.22921200  |
| H | -15.75839500 | 1.74095700  | 0.81434600  |
| H | -14.37903000 | 1.73737500  | 1.94066100  |
| O | -12.80133000 | 3.04818100  | 0.13252300  |
| N | -9.37323500  | 0.51128200  | 0.24928000  |
| H | -8.36739000  | 0.35074100  | 0.17149500  |
| C | -9.84546200  | 1.73518800  | 0.87853100  |
| C | -9.20987600  | 2.96782000  | 0.22703400  |
| H | -10.93406700 | 1.75730400  | 0.81216800  |
| H | -9.55470200  | 1.75372300  | 1.93848200  |
| O | -7.97700300  | 3.06452800  | 0.13034500  |
| N | -4.54890700  | 0.52763000  | 0.24710200  |
| H | -3.54306200  | 0.36708800  | 0.16931700  |
| C | -5.02113500  | 1.75153500  | 0.87635300  |
| C | -4.38554800  | 2.98416800  | 0.22485600  |
| H | -6.10973900  | 1.77365200  | 0.80999000  |
| H | -4.73037500  | 1.77007000  | 1.93630400  |
| O | -3.15267500  | 3.08087600  | 0.12816700  |
| N | 0.27542000   | 0.54397700  | 0.24492400  |
| H | 1.28126600   | 0.38343600  | 0.16713900  |
| C | -0.19680700  | 1.76788300  | 0.87417500  |
| C | 0.43878000   | 3.00051500  | 0.22267800  |
| H | -1.28541200  | 1.78999900  | 0.80781200  |
| H | 0.09395300   | 1.78641700  | 1.93412600  |
| O | 1.67165300   | 3.09722300  | 0.12598900  |
| N | 5.09974800   | 0.56032400  | 0.24274500  |

|   |              |            |             |
|---|--------------|------------|-------------|
| H | 6.10559400   | 0.39978300 | 0.16496100  |
| C | 4.62752100   | 1.78423000 | 0.87199600  |
| C | 5.26310800   | 3.01686300 | 0.22049900  |
| H | 3.53891600   | 1.80634700 | 0.80563400  |
| H | 4.91828100   | 1.80276500 | 1.93194800  |
| O | 6.49598100   | 3.11357100 | 0.12381100  |
| N | 9.92407600   | 0.57667200 | 0.24056700  |
| H | 10.92992100  | 0.41613000 | 0.16278300  |
| C | 9.45184900   | 1.80057800 | 0.86981800  |
| C | 10.08743500  | 3.03321000 | 0.21832100  |
| H | 8.36324400   | 1.82269400 | 0.80345600  |
| H | 9.74260900   | 1.81911200 | 1.92977000  |
| O | 11.32030800  | 3.12991800 | 0.12163200  |
| N | 14.74840400  | 0.59301900 | 0.23838900  |
| H | 15.75424900  | 0.43247800 | 0.16060500  |
| C | 14.27617600  | 1.81692500 | 0.86764000  |
| C | 14.91176300  | 3.04955800 | 0.21614300  |
| H | 13.18757200  | 1.83904200 | 0.80127800  |
| H | 14.56693600  | 1.83546000 | 1.92759200  |
| O | 16.14463600  | 3.14626600 | 0.11945400  |
| N | -14.90229200 | 3.89931600 | -0.19174500 |
| H | -15.90576800 | 3.72342100 | -0.11660400 |
| C | -14.44748600 | 5.14234800 | -0.79583200 |
| C | -15.09925600 | 6.35239600 | -0.11849700 |
| H | -13.35922200 | 5.17801100 | -0.72978200 |
| H | -14.73950900 | 5.17883800 | -1.85497000 |
| O | -16.33324300 | 6.43016700 | -0.01897000 |
| N | -10.07796400 | 3.91566300 | -0.19392300 |
| H | -11.08144000 | 3.73976800 | -0.11878300 |
| C | -9.62315800  | 5.15869600 | -0.79801100 |
| C | -10.27492900 | 6.36874300 | -0.12067500 |
| H | -8.53489400  | 5.19435900 | -0.73196000 |
| H | -9.91518200  | 5.19518500 | -1.85714800 |
| O | -11.50891500 | 6.44651400 | -0.02114800 |
| N | -5.25363700  | 3.93201100 | -0.19610100 |
| H | -6.25711300  | 3.75611600 | -0.12096100 |
| C | -4.79883100  | 5.17504300 | -0.80018900 |
| C | -5.45060100  | 6.38509100 | -0.12285400 |
| H | -3.71056600  | 5.21070600 | -0.73413800 |
| H | -5.09085400  | 5.21153300 | -1.85932700 |
| O | -6.68458800  | 6.46286100 | -0.02332600 |
| N | -0.42930900  | 3.94835800 | -0.19827900 |
| H | -1.43278500  | 3.77246300 | -0.12313900 |
| C | 0.02549700   | 5.19139100 | -0.80236700 |

|   |              |            |             |
|---|--------------|------------|-------------|
| C | -0.62627300  | 6.40143800 | -0.12503200 |
| H | 1.11376100   | 5.22705400 | -0.73631600 |
| H | -0.26652600  | 5.22788000 | -1.86150500 |
| O | -1.86026000  | 6.47920900 | -0.02550400 |
| N | 4.39501900   | 3.96470600 | -0.20045700 |
| H | 3.39154300   | 3.78881100 | -0.12531700 |
| C | 4.84982500   | 5.20773800 | -0.80454500 |
| C | 4.19805500   | 6.41778600 | -0.12721000 |
| H | 5.93808900   | 5.24340100 | -0.73849400 |
| H | 4.55780100   | 5.24422700 | -1.86368300 |
| O | 2.96406800   | 6.49555600 | -0.02768200 |
| N | 9.21934700   | 3.98105300 | -0.20263500 |
| H | 8.21587100   | 3.80515800 | -0.12749500 |
| C | 9.67415200   | 5.22408600 | -0.80672300 |
| C | 9.02238200   | 6.43413300 | -0.12938800 |
| H | 10.76241700  | 5.25974900 | -0.74067300 |
| H | 9.38212900   | 5.26057500 | -1.86586100 |
| O | 7.78839600   | 6.51190400 | -0.02986000 |
| N | 14.04367400  | 3.99740100 | -0.20481300 |
| H | 13.04019800  | 3.82150600 | -0.12967300 |
| C | 14.49848000  | 5.24043300 | -0.80890100 |
| C | 13.84671000  | 6.45048100 | -0.13156600 |
| H | 15.58674500  | 5.27609600 | -0.74285100 |
| H | 14.20645700  | 5.27692200 | -1.86803900 |
| O | 12.61272300  | 6.52825100 | -0.03203900 |
| N | -14.24381800 | 7.30313400 | 0.32140300  |
| H | -13.23810200 | 7.14260900 | 0.24193800  |
| C | -14.71501400 | 8.52703800 | 0.95142900  |
| C | -14.08053900 | 9.75967500 | 0.29885500  |
| H | -15.80372800 | 8.54913500 | 0.88688700  |
| H | -14.42248200 | 8.54559000 | 2.01089200  |
| O | -12.84783100 | 9.85640300 | 0.20010300  |
| N | -9.41949100  | 7.31948100 | 0.31922500  |
| H | -8.41377400  | 7.15895600 | 0.23976000  |
| C | -9.89068600  | 8.54338600 | 0.94925000  |
| C | -9.25621100  | 9.77602200 | 0.29667700  |
| H | -10.97940100 | 8.56548300 | 0.88470900  |
| H | -9.59815400  | 8.56193800 | 2.00871400  |
| O | -8.02350300  | 9.87275000 | 0.19792500  |
| N | -4.59516300  | 7.33582900 | 0.31704600  |
| H | -3.58944600  | 7.17530400 | 0.23758100  |
| C | -5.06635800  | 8.55973300 | 0.94707200  |
| C | -4.43188400  | 9.79236900 | 0.29449900  |
| H | -6.15507300  | 8.58183000 | 0.88253100  |

|   |              |             |             |
|---|--------------|-------------|-------------|
| H | -4.77382600  | 8.57828500  | 2.00653600  |
| O | -3.19917600  | 9.88909800  | 0.19574700  |
| N | 0.22916500   | 7.35217600  | 0.31486800  |
| H | 1.23488200   | 7.19165100  | 0.23540300  |
| C | -0.24203000  | 8.57608100  | 0.94489400  |
| C | 0.39244400   | 9.80871700  | 0.29232100  |
| H | -1.33074500  | 8.59817800  | 0.88035200  |
| H | 0.05050200   | 8.59463300  | 2.00435800  |
| O | 1.62515200   | 9.90544500  | 0.19356900  |
| N | 5.05349300   | 7.36852400  | 0.31269000  |
| H | 6.05920900   | 7.20799900  | 0.23322500  |
| C | 4.58229700   | 8.59242800  | 0.94271600  |
| C | 5.21677200   | 9.82506400  | 0.29014300  |
| H | 3.49358300   | 8.61452500  | 0.87817400  |
| H | 4.87482900   | 8.61098000  | 2.00218000  |
| O | 6.44948000   | 9.92179300  | 0.19139100  |
| N | 9.87782000   | 7.38487100  | 0.31051200  |
| H | 10.88353700  | 7.22434600  | 0.23104700  |
| C | 9.40662500   | 8.60877600  | 0.94053800  |
| C | 10.04110000  | 9.84141200  | 0.28796500  |
| H | 8.31791000   | 8.63087300  | 0.87599600  |
| H | 9.69915700   | 8.62732800  | 2.00000100  |
| O | 11.27380800  | 9.93814000  | 0.18921300  |
| N | 14.70214800  | 7.40121800  | 0.30833400  |
| H | 15.70786500  | 7.24069300  | 0.22886900  |
| C | 14.23095300  | 8.62512300  | 0.93836000  |
| C | 14.86542700  | 9.85775900  | 0.28578700  |
| H | 13.14223800  | 8.64722000  | 0.87381800  |
| H | 14.52348500  | 8.64367500  | 1.99782300  |
| O | 16.09813500  | 9.95448700  | 0.18703500  |
| N | -14.94934700 | 10.70749800 | -0.12066000 |
| H | -15.95269300 | 10.53158600 | -0.04383900 |
| C | -14.49557400 | 11.95053100 | -0.72552100 |
| H | -13.79006600 | 12.46924700 | -0.06660300 |
| H | -13.99485200 | 11.76872400 | -1.68443100 |
| N | -10.12501900 | 10.72384500 | -0.12283800 |
| H | -11.12836500 | 10.54793400 | -0.04601700 |
| C | -9.67124600  | 11.96687900 | -0.72770000 |
| H | -8.96573900  | 12.48559400 | -0.06878100 |
| H | -9.17052400  | 11.78507100 | -1.68660900 |
| N | -5.30069100  | 10.74019300 | -0.12501600 |
| H | -6.30403700  | 10.56428100 | -0.04819500 |
| C | -4.84691800  | 11.98322600 | -0.72987800 |
| H | -4.14141100  | 12.50194200 | -0.07095900 |

|   |              |             |             |
|---|--------------|-------------|-------------|
| H | -4.34619700  | 11.80141900 | -1.68878700 |
| N | -0.47636400  | 10.75654000 | -0.12719400 |
| H | -1.47971000  | 10.58062900 | -0.05037300 |
| C | -0.02259000  | 11.99957400 | -0.73205600 |
| H | 0.68291700   | 12.51828900 | -0.07313700 |
| H | 0.47813100   | 11.81776600 | -1.69096500 |
| N | 4.34796400   | 10.77288800 | -0.12937200 |
| H | 3.34461800   | 10.59697600 | -0.05255200 |
| C | 4.80173700   | 12.01592100 | -0.73423400 |
| H | 5.50724500   | 12.53463700 | -0.07531500 |
| H | 5.30245900   | 11.83411400 | -1.69314300 |
| N | 9.17229200   | 10.78923500 | -0.13155000 |
| H | 8.16894600   | 10.61332400 | -0.05473000 |
| C | 9.62606500   | 12.03226800 | -0.73641200 |
| H | 10.33157200  | 12.55098400 | -0.07749400 |
| H | 10.12678700  | 11.85046100 | -1.69532100 |
| N | 13.99662000  | 10.80558200 | -0.13372800 |
| H | 12.99327400  | 10.62967100 | -0.05690800 |
| C | 14.45039300  | 12.04861600 | -0.73859000 |
| H | 15.15590000  | 12.56733200 | -0.07967200 |
| H | 14.95111400  | 11.86680800 | -1.69749900 |
| H | -15.36136800 | 12.59591100 | -0.89525600 |
| H | -10.53704100 | 12.61225800 | -0.89743400 |
| H | -5.71271300  | 12.62860500 | -0.89961200 |
| H | -0.88838500  | 12.64495300 | -0.90179000 |
| H | 3.93594300   | 12.66130000 | -0.90396800 |
| H | 8.76027000   | 12.67764800 | -0.90614700 |
| H | 13.58459800  | 12.69399500 | -0.90832500 |

7 strand PII-like structure with each strand equivalent

|   |             |             |             |
|---|-------------|-------------|-------------|
| C | 11.01898400 | -0.25899100 | 1.03756600  |
| H | 11.28629000 | -1.31906100 | 1.09591700  |
| H | 10.71005100 | 0.07788200  | 2.03404700  |
| H | 11.88794400 | 0.32909500  | 0.73149600  |
| C | 11.04344500 | 4.42753700  | -0.56279300 |
| H | 11.31075200 | 3.36746800  | -0.50444100 |
| H | 10.73451200 | 4.76441100  | 0.43368900  |
| H | 11.91240600 | 5.01562400  | -0.86886200 |
| C | 10.97448400 | 0.69869100  | -3.82105100 |
| H | 11.24179100 | -0.36137800 | -3.76270000 |
| H | 10.66555100 | 1.03556500  | -2.82457000 |
| H | 11.84344400 | 1.28677800  | -4.12712100 |
| C | 10.95002200 | -3.98783700 | -2.22069300 |
| H | 11.21732900 | -5.04790600 | -2.16234100 |
| H | 10.64108900 | -3.65096400 | -1.22421100 |
| H | 11.81898300 | -3.39975100 | -2.52676200 |
| C | 10.99452200 | -4.94552000 | 2.63792400  |
| H | 11.26182800 | -6.00558900 | 2.69627600  |
| H | 10.68558900 | -4.60864600 | 3.63440600  |
| H | 11.86348200 | -4.35743400 | 2.33185500  |
| C | 11.06348300 | -1.21667400 | 5.89618300  |
| H | 11.33079000 | -2.27674300 | 5.95453400  |
| H | 10.75455000 | -0.87980000 | 6.89266400  |
| H | 11.93244300 | -0.62858800 | 5.59011300  |
| C | 11.08794500 | 3.46985500  | 4.29582400  |
| H | 11.35525200 | 2.40978500  | 4.35417600  |
| H | 10.77901200 | 3.80672800  | 5.29230600  |
| H | 11.95690500 | 4.05794100  | 3.98975500  |
| C | 9.87759200  | -0.00121600 | 0.06584300  |
| O | 9.70440100  | 1.08801000  | -0.48973100 |
| C | 9.90205300  | 4.68531300  | -1.53451500 |
| O | 9.72886300  | 5.77453800  | -2.09008900 |
| C | 9.83309200  | 0.95646700  | -4.79277400 |
| O | 9.65990100  | 2.04569300  | -5.34834800 |
| C | 9.80863000  | -3.73006100 | -3.19241500 |
| O | 9.63544000  | -2.64083600 | -3.74798900 |
| C | 9.85313000  | -4.68774400 | 1.66620200  |
| O | 9.67993900  | -3.59851900 | 1.11062800  |
| C | 9.92209100  | -0.95889800 | 4.92446000  |
| O | 9.74890000  | 0.13032700  | 4.36888600  |
| C | 9.94655300  | 3.72763000  | 3.32410200  |



|   |            |             |             |
|---|------------|-------------|-------------|
| O | 9.77336200 | 4.81685600  | 2.76852800  |
| N | 9.03726700 | -1.05238500 | -0.11568200 |
| H | 9.21650900 | -1.92406000 | 0.37130100  |
| C | 7.83833500 | -0.92625900 | -0.91747000 |
| C | 6.70881200 | -0.18217700 | -0.18351700 |
| H | 8.07057300 | -0.41853800 | -1.85894700 |
| H | 7.46607300 | -1.92912000 | -1.15365600 |
| O | 6.55976300 | -0.25134600 | 1.04006800  |
| N | 9.06172800 | 3.63414400  | -1.71604000 |
| H | 9.24097100 | 2.76246900  | -1.22905800 |
| C | 7.86279700 | 3.76027000  | -2.51782900 |
| C | 6.73327400 | 4.50435200  | -1.78387600 |
| H | 8.09503500 | 4.26799100  | -3.45930600 |
| H | 7.49053500 | 2.75740800  | -2.75401500 |
| O | 6.58422500 | 4.43518200  | -0.56029000 |
| N | 8.99276700 | -0.09470200 | -4.97429900 |
| H | 9.17200900 | -0.96637700 | -4.48731600 |
| C | 7.79383500 | 0.03142400  | -5.77608700 |
| C | 6.66431200 | 0.77550600  | -5.04213400 |
| H | 8.02607300 | 0.53914500  | -6.71756500 |
| H | 7.42157400 | -0.97143800 | -6.01227300 |
| O | 6.51526300 | 0.70633600  | -3.81854900 |
| N | 8.96830500 | -4.78123100 | -3.37394100 |
| H | 9.14754700 | -5.65290600 | -2.88695800 |
| C | 7.76937400 | -4.65510500 | -4.17572900 |
| C | 6.63985100 | -3.91102300 | -3.44177600 |
| H | 8.00161200 | -4.14738400 | -5.11720600 |
| H | 7.39711200 | -5.65796600 | -4.41191500 |
| O | 6.49080100 | -3.98019200 | -2.21819000 |
| N | 9.01280500 | -5.73891400 | 1.48467700  |
| H | 9.19204700 | -6.61058800 | 1.97165900  |
| C | 7.81387300 | -5.61278800 | 0.68288900  |
| C | 6.68435000 | -4.86870600 | 1.41684100  |
| H | 8.04611100 | -5.10506600 | -0.25858900 |
| H | 7.44161100 | -6.61564900 | 0.44670200  |
| O | 6.53530100 | -4.93787500 | 2.64042700  |
| N | 9.08176600 | -2.01006800 | 4.74293500  |
| H | 9.26100800 | -2.88174200 | 5.22991800  |
| C | 7.88283400 | -1.88394200 | 3.94114700  |
| C | 6.75331100 | -1.13986000 | 4.67510000  |
| H | 8.11507200 | -1.37622100 | 2.99967000  |
| H | 7.51057300 | -2.88680300 | 3.70496100  |
| O | 6.60426200 | -1.20902900 | 5.89868600  |

|   |            |             |             |
|---|------------|-------------|-------------|
| N | 9.10622800 | 2.67646100  | 3.14257700  |
| H | 9.28547000 | 1.80478600  | 3.62955900  |
| C | 7.90729600 | 2.80258700  | 2.34078900  |
| C | 6.77777300 | 3.54666900  | 3.07474100  |
| H | 8.13953400 | 3.31030800  | 1.39931100  |
| H | 7.53503400 | 1.79972500  | 2.10460200  |
| O | 6.62872400 | 3.47750000  | 4.29832700  |
| N | 5.87244000 | 0.51996800  | -0.99069100 |
| H | 6.03866600 | 0.53218500  | -1.99134900 |
| C | 4.69413700 | 1.17569700  | -0.46359400 |
| C | 3.54714800 | 0.19180600  | -0.17283200 |
| H | 4.95037800 | 1.73032700  | 0.44460300  |
| H | 4.32709400 | 1.89090600  | -1.20780400 |
| O | 3.36734600 | -0.82854500 | -0.84418600 |
| N | 5.89690200 | 5.20649600  | -2.59104900 |
| H | 6.06312800 | 5.21871400  | -3.59170700 |
| C | 4.71859900 | 5.86222500  | -2.06395300 |
| C | 3.57161000 | 4.87833400  | -1.77319000 |
| H | 4.97484000 | 6.41685500  | -1.15575600 |
| H | 4.35155600 | 6.57743500  | -2.80816200 |
| O | 3.39180800 | 3.85798300  | -2.44454500 |
| N | 5.82794100 | 1.47765100  | -5.84930800 |
| H | 5.99416700 | 1.48986800  | -6.84996600 |
| C | 4.64963800 | 2.13337900  | -5.32221100 |
| C | 3.50264900 | 1.14948800  | -5.03144900 |
| H | 4.90587900 | 2.68800900  | -4.41401500 |
| H | 4.28259500 | 2.84858900  | -6.06642100 |
| O | 3.32284700 | 0.12913700  | -5.70280300 |
| N | 5.80347900 | -3.20887800 | -4.24894900 |
| H | 5.96970500 | -3.19666100 | -5.24960700 |
| C | 4.62517600 | -2.55314900 | -3.72185300 |
| C | 3.47818700 | -3.53704000 | -3.43109100 |
| H | 4.88141700 | -1.99851900 | -2.81365600 |
| H | 4.25813300 | -1.83793900 | -4.46606200 |
| O | 3.29838500 | -4.55739100 | -4.10244500 |
| N | 5.84797800 | -4.16656100 | 0.60966800  |
| H | 6.01420400 | -4.15434300 | -0.39099000 |
| C | 4.66967500 | -3.51083200 | 1.13676400  |
| C | 3.52268700 | -4.49472300 | 1.42752700  |
| H | 4.92591600 | -2.95620200 | 2.04496100  |
| H | 4.30263200 | -2.79562200 | 0.39255500  |
| O | 3.34288400 | -5.51507400 | 0.75617200  |
| N | 5.91694000 | -0.43771500 | 3.86792600  |

|   |            |             |             |
|---|------------|-------------|-------------|
| H | 6.08316500 | -0.42549800 | 2.86726800  |
| C | 4.73863700 | 0.21801400  | 4.39502300  |
| C | 3.59164800 | -0.76587700 | 4.68578500  |
| H | 4.99487800 | 0.77264400  | 5.30322000  |
| H | 4.37159400 | 0.93322400  | 3.65081300  |
| O | 3.41184600 | -1.78622800 | 4.01443100  |
| N | 5.94140100 | 4.24881400  | 2.26756800  |
| H | 6.10762700 | 4.26103100  | 1.26691000  |
| C | 4.76309900 | 4.90454200  | 2.79466500  |
| C | 3.61611000 | 3.92065200  | 3.08542700  |
| H | 5.01934000 | 5.45917300  | 3.70286100  |
| H | 4.39605600 | 5.61975200  | 2.05045500  |
| O | 3.43630700 | 2.90030100  | 2.41407200  |
| N | 2.73190500 | 0.55554800  | 0.85045900  |
| H | 2.92323000 | 1.41129800  | 1.36053900  |
| C | 1.54127500 | -0.20408800 | 1.16915200  |
| C | 0.38652600 | 0.06239100  | 0.18746400  |
| H | 1.77507800 | -1.27319400 | 1.19019200  |
| H | 1.19364100 | 0.08864100  | 2.16592400  |
| O | 0.22280100 | 1.15862700  | -0.35624900 |
| N | 2.75636700 | 5.24207600  | -0.74990000 |
| H | 2.94769200 | 6.09782700  | -0.23981900 |
| C | 1.56573700 | 4.48244100  | -0.43120700 |
| C | 0.41098800 | 4.74892000  | -1.41289500 |
| H | 1.79953900 | 3.41333400  | -0.41016700 |
| H | 1.21810300 | 4.77517000  | 0.56556500  |
| O | 0.24726300 | 5.84515500  | -1.95660700 |
| N | 2.68740500 | 1.51323000  | -4.00815800 |
| H | 2.87873000 | 2.36898100  | -3.49807800 |
| C | 1.49677600 | 0.75359500  | -3.68946600 |
| C | 0.34202700 | 1.02007400  | -4.67115300 |
| H | 1.73057800 | -0.31551100 | -3.66842500 |
| H | 1.14914200 | 1.04632400  | -2.69269400 |
| O | 0.17830200 | 2.11630900  | -5.21486600 |
| N | 2.66294300 | -3.17329800 | -2.40780000 |
| H | 2.85426900 | -2.31754800 | -1.89771900 |
| C | 1.47231400 | -3.93293400 | -2.08910700 |
| C | 0.31756500 | -3.66645500 | -3.07079500 |
| H | 1.70611600 | -5.00204000 | -2.06806700 |
| H | 1.12468000 | -3.64020500 | -1.09233500 |
| O | 0.15384000 | -2.57021900 | -3.61450800 |
| N | 2.70744300 | -4.13098100 | 2.45081700  |
| H | 2.89876800 | -3.27523000 | 2.96089800  |

|   |             |             |             |
|---|-------------|-------------|-------------|
| C | 1.51681400  | -4.89061600 | 2.76951000  |
| C | 0.36206500  | -4.62413800 | 1.78782200  |
| H | 1.75061600  | -5.95972300 | 2.79055000  |
| H | 1.16917900  | -4.59788800 | 3.76628200  |
| O | 0.19833900  | -3.52790200 | 1.24411000  |
| N | 2.77640400  | -0.40213500 | 5.70907600  |
| H | 2.96772900  | 0.45361500  | 6.21915600  |
| C | 1.58577500  | -1.16177000 | 6.02776900  |
| C | 0.43102600  | -0.89529200 | 5.04608100  |
| H | 1.81957700  | -2.23087700 | 6.04880900  |
| H | 1.23814000  | -0.86904200 | 7.02454100  |
| O | 0.26730100  | 0.20094400  | 4.50236800  |
| N | 2.80086600  | 4.28439400  | 4.10871700  |
| H | 2.99219100  | 5.14014400  | 4.61879800  |
| C | 1.61023700  | 3.52475800  | 4.42741000  |
| C | 0.45548800  | 3.79123700  | 3.44572200  |
| H | 1.84403900  | 2.45565200  | 4.44845100  |
| H | 1.26260200  | 3.81748700  | 5.42418200  |
| O | 0.29176300  | 4.88747200  | 2.90201000  |
| N | -0.45386800 | -0.98766700 | -0.00007100 |
| H | -0.27470800 | -1.86211100 | 0.48195200  |
| C | -1.65275900 | -0.85689400 | -0.80117500 |
| C | -2.78225700 | -0.11691800 | -0.06304400 |
| H | -1.42044800 | -0.34384200 | -1.73974000 |
| H | -2.02508500 | -1.85836900 | -1.04307700 |
| O | -2.93135900 | -0.19303600 | 1.16012200  |
| N | -0.42940600 | 3.69886100  | -1.60043000 |
| H | -0.25024600 | 2.82441700  | -1.11840700 |
| C | -1.62829700 | 3.82963400  | -2.40153300 |
| C | -2.75779500 | 4.56961100  | -1.66340300 |
| H | -1.39598600 | 4.34268600  | -3.34009800 |
| H | -2.00062300 | 2.82816000  | -2.64343600 |
| O | -2.90689700 | 4.49349300  | -0.44023600 |
| N | -0.49836700 | -0.02998500 | -4.85868800 |
| H | -0.31920800 | -0.90442900 | -4.37666600 |
| C | -1.69725900 | 0.10078800  | -5.65979200 |
| C | -2.82675600 | 0.84076500  | -4.92166100 |
| H | -1.46494700 | 0.61384100  | -6.59835700 |
| H | -2.06958400 | -0.90068600 | -5.90169400 |
| O | -2.97585800 | 0.76464700  | -3.69849500 |
| N | -0.52282900 | -4.71651300 | -3.25833000 |
| H | -0.34366900 | -5.59095700 | -2.77630700 |
| C | -1.72172000 | -4.58574000 | -4.05943400 |

|   |             |             |             |
|---|-------------|-------------|-------------|
| C | -2.85121800 | -3.84576400 | -3.32130300 |
| H | -1.48940900 | -4.07268800 | -4.99799800 |
| H | -2.09404600 | -5.58721500 | -4.30133600 |
| O | -3.00032000 | -3.92188200 | -2.09813700 |
| N | -0.47833000 | -5.67419600 | 1.60028700  |
| H | -0.29917000 | -6.54864000 | 2.08231000  |
| C | -1.67722100 | -5.54342300 | 0.79918400  |
| C | -2.80671900 | -4.80344600 | 1.53731400  |
| H | -1.44490900 | -5.03037100 | -0.13938100 |
| H | -2.04954600 | -6.54489800 | 0.55728100  |
| O | -2.95582000 | -4.87956500 | 2.76048100  |
| N | -0.40936800 | -1.94535000 | 4.85854600  |
| H | -0.23020900 | -2.81979400 | 5.34056900  |
| C | -1.60826000 | -1.81457700 | 4.05744200  |
| C | -2.73775700 | -1.07460100 | 4.79557300  |
| H | -1.37594800 | -1.30152500 | 3.11887700  |
| H | -1.98058500 | -2.81605200 | 3.81554000  |
| O | -2.88685900 | -1.15071900 | 6.01873900  |
| N | -0.38490700 | 2.74117900  | 3.25818800  |
| H | -0.20574700 | 1.86673500  | 3.74021000  |
| C | -1.58379800 | 2.87195100  | 2.45708400  |
| C | -2.71329500 | 3.61192800  | 3.19521400  |
| H | -1.35148600 | 3.38500400  | 1.51851900  |
| H | -1.95612300 | 1.87047700  | 2.21518100  |
| O | -2.86239700 | 3.53581000  | 4.41838100  |
| N | -3.61854600 | 0.58986900  | -0.86624300 |
| H | -3.45228000 | 0.60776700  | -1.86680800 |
| C | -4.79682200 | 1.24267400  | -0.33546900 |
| C | -5.94389300 | 0.25722900  | -0.05035400 |
| H | -4.54057600 | 1.79211000  | 0.57587800  |
| H | -5.16378400 | 1.96213300  | -1.07561200 |
| O | -6.12374400 | -0.75927300 | -0.72750900 |
| N | -3.59408400 | 5.27639800  | -2.46660100 |
| H | -3.42781800 | 5.29429600  | -3.46716700 |
| C | -4.77236000 | 5.92920300  | -1.93582800 |
| C | -5.91943100 | 4.94375700  | -1.65071200 |
| H | -4.51611400 | 6.47863900  | -1.02448100 |
| H | -5.13932200 | 6.64866200  | -2.67597100 |
| O | -6.09928200 | 3.92725500  | -2.32786700 |
| N | -3.66304500 | 1.54755200  | -5.72486000 |
| H | -3.49677900 | 1.56545000  | -6.72542600 |
| C | -4.84132100 | 2.20035700  | -5.19408700 |
| C | -5.98839300 | 1.21491200  | -4.90897100 |

|   |             |             |             |
|---|-------------|-------------|-------------|
| H | -4.58507500 | 2.74979300  | -4.28273900 |
| H | -5.20828300 | 2.91981600  | -5.93423000 |
| O | -6.16824300 | 0.19841000  | -5.58612600 |
| N | -3.68750700 | -3.13897700 | -4.12450100 |
| H | -3.52124100 | -3.12107900 | -5.12506700 |
| C | -4.86578300 | -2.48617200 | -3.59372800 |
| C | -6.01285500 | -3.47161700 | -3.30861200 |
| H | -4.60953700 | -1.93673600 | -2.68238100 |
| H | -5.23274500 | -1.76671300 | -4.33387100 |
| O | -6.19270500 | -4.48811900 | -3.98576800 |
| N | -3.64300800 | -4.09666000 | 0.73411600  |
| H | -3.47674200 | -4.07876200 | -0.26645000 |
| C | -4.82128300 | -3.44385400 | 1.26488900  |
| C | -5.96835500 | -4.42930000 | 1.55000500  |
| H | -4.56503800 | -2.89441900 | 2.17623600  |
| H | -5.18824500 | -2.72439500 | 0.52474600  |
| O | -6.14820500 | -5.44580200 | 0.87285000  |
| N | -3.57404600 | -0.36781400 | 3.99237400  |
| H | -3.40778100 | -0.34991600 | 2.99180900  |
| C | -4.75232200 | 0.28499100  | 4.52314800  |
| C | -5.89939400 | -0.70045400 | 4.80826300  |
| H | -4.49607600 | 0.83442700  | 5.43449500  |
| H | -5.11928400 | 1.00445100  | 3.78300500  |
| O | -6.07924400 | -1.71695600 | 4.13110800  |
| N | -3.54958500 | 4.31871500  | 2.39201600  |
| H | -3.38331900 | 4.33661300  | 1.39145000  |
| C | -4.72786000 | 4.97152000  | 2.92278900  |
| C | -5.87493200 | 3.98607500  | 3.20790500  |
| H | -4.47161400 | 5.52095600  | 3.83413600  |
| H | -5.09482200 | 5.69097900  | 2.18264600  |
| O | -6.05478200 | 2.96957300  | 2.53075000  |
| N | -6.75915100 | 0.61520300  | 0.97495800  |
| H | -6.56778300 | 1.46802400  | 1.48990600  |
| C | -7.94984700 | -0.14614600 | 1.28927800  |
| C | -9.10453900 | 0.12599700  | 0.30907800  |
| H | -7.71612400 | -1.21537300 | 1.30424500  |
| H | -8.29750000 | 0.14093200  | 2.28768600  |
| O | -9.26816300 | 1.22532000  | -0.22839600 |
| N | -6.73468900 | 5.30173200  | -0.62540000 |
| H | -6.54332100 | 6.15455200  | -0.11045200 |
| C | -7.92538600 | 4.54038200  | -0.31108000 |
| C | -9.08007700 | 4.81252600  | -1.29128100 |
| H | -7.69166200 | 3.47115600  | -0.29611400 |

|   |              |             |             |
|---|--------------|-------------|-------------|
| H | -8.27303800  | 4.82746100  | 0.68732800  |
| O | -9.24370100  | 5.91184900  | -1.82875400 |
| N | -6.80365000  | 1.57288600  | -3.88365900 |
| H | -6.61228200  | 2.42570600  | -3.36871100 |
| C | -7.99434700  | 0.81153600  | -3.56933900 |
| C | -9.14903800  | 1.08368000  | -4.54953900 |
| H | -7.76062300  | -0.25769000 | -3.55437200 |
| H | -8.34199900  | 1.09861500  | -2.57093100 |
| O | -9.31266200  | 2.18300300  | -5.08701300 |
| N | -6.82811200  | -3.11364300 | -2.28330000 |
| H | -6.63674400  | -2.26082200 | -1.76835200 |
| C | -8.01880900  | -3.87499200 | -1.96898000 |
| C | -9.17350000  | -3.60284900 | -2.94918100 |
| H | -7.78508500  | -4.94421800 | -1.95401400 |
| H | -8.36646100  | -3.58791400 | -0.97057300 |
| O | -9.33712400  | -2.50352600 | -3.48665400 |
| N | -6.78361200  | -4.07132600 | 2.57531700  |
| H | -6.59224500  | -3.21850500 | 3.09026500  |
| C | -7.97430900  | -4.83267500 | 2.88963700  |
| C | -9.12900100  | -4.56053200 | 1.90943600  |
| H | -7.74058600  | -5.90190100 | 2.90460400  |
| H | -8.32196100  | -4.54559700 | 3.88804500  |
| O | -9.29262500  | -3.46120900 | 1.37196300  |
| N | -6.71465100  | -0.34248000 | 5.83357500  |
| H | -6.52328300  | 0.51034100  | 6.34852400  |
| C | -7.90534800  | -1.10382900 | 6.14789500  |
| C | -9.06003900  | -0.83168600 | 5.16769500  |
| H | -7.67162400  | -2.17305500 | 6.16286200  |
| H | -8.25300000  | -0.81675100 | 7.14630300  |
| O | -9.22366400  | 0.26763700  | 4.63022100  |
| N | -6.69018900  | 4.34404900  | 4.23321700  |
| H | -6.49882200  | 5.19687000  | 4.74816500  |
| C | -7.88088600  | 3.58269900  | 4.54753700  |
| C | -9.03557700  | 3.85484300  | 3.56733600  |
| H | -7.64716300  | 2.51347300  | 4.56250400  |
| H | -8.22853800  | 3.86977800  | 5.54594500  |
| O | -9.19920200  | 4.95416600  | 3.02986300  |
| N | -9.94500200  | -0.92291600 | 0.11554000  |
| N | -9.92054000  | 3.76361300  | -1.48481900 |
| N | -9.98950200  | 0.03476700  | -4.74307700 |
| N | -10.01396300 | -4.65176200 | -3.14271900 |
| N | -9.96946400  | -5.60944500 | 1.71589800  |
| N | -9.90050300  | -1.88059900 | 4.97415700  |

|   |              |             |             |
|---|--------------|-------------|-------------|
| N | -9.87604100  | 2.80593000  | 3.37379800  |
| H | -9.76592500  | -1.80010100 | 0.59258700  |
| H | -9.74146300  | 2.88642700  | -1.00777200 |
| H | -9.81042400  | -0.84241900 | -4.26603100 |
| H | -9.83488600  | -5.52894700 | -2.66567200 |
| H | -9.79038700  | -6.48663000 | 2.19294500  |
| H | -9.72142500  | -2.75778400 | 5.45120400  |
| H | -9.69696300  | 1.92874500  | 3.85084500  |
| C | -11.14385300 | -0.78750000 | -0.68485400 |
| H | -10.91146700 | -0.26913400 | -1.62047500 |
| H | -11.51624100 | -1.78755500 | -0.93246400 |
| H | -11.93033000 | -0.22583800 | -0.16361700 |
| C | -11.11939100 | 3.89902800  | -2.28521200 |
| H | -10.88700500 | 4.41739500  | -3.22083400 |
| H | -11.49178000 | 2.89897400  | -2.53282200 |
| H | -11.90586800 | 4.46069100  | -1.76397600 |
| C | -11.18835200 | 0.17018200  | -5.54347100 |
| H | -10.95596700 | 0.68854900  | -6.47909200 |
| H | -11.56074100 | -0.82987200 | -5.79108100 |
| H | -11.97482900 | 0.73184500  | -5.02223500 |
| C | -11.21281400 | -4.51634600 | -3.94311200 |
| H | -10.98042800 | -3.99798000 | -4.87873400 |
| H | -11.58520300 | -5.51640100 | -4.19072200 |
| H | -11.99929100 | -3.95468400 | -3.42187600 |
| C | -11.16831400 | -5.47402900 | 0.91550500  |
| H | -10.93592900 | -4.95566200 | -0.02011700 |
| H | -11.54070300 | -6.47408400 | 0.66789500  |
| H | -11.95479200 | -4.91236700 | 1.43674100  |
| C | -11.09935300 | -1.74518300 | 4.17376400  |
| H | -10.86696800 | -1.22681600 | 3.23814200  |
| H | -11.47174200 | -2.74523800 | 3.92615300  |
| H | -11.88583100 | -1.18352100 | 4.69500000  |
| C | -11.07489100 | 2.94134600  | 2.57340500  |
| H | -10.84250600 | 3.45971200  | 1.63778300  |
| H | -11.44728000 | 1.94129100  | 2.32579500  |
| H | -11.86136900 | 3.50300800  | 3.09464100  |



### 3 strand PII-like structure with strands equivalent

|   |              |             |             |
|---|--------------|-------------|-------------|
| C | -11.03544800 | -2.20560400 | -3.19214500 |
| H | -11.17961600 | -3.27877900 | -3.35283100 |
| H | -10.78150800 | -1.73847100 | -4.15053100 |
| H | -11.96514200 | -1.75571400 | -2.83317300 |
| C | -11.04775900 | 2.50208900  | -1.57180100 |
| H | -11.19307300 | 1.42844100  | -1.72823700 |
| H | -10.79367600 | 2.96521000  | -2.53209400 |
| H | -11.97687000 | 2.95432700  | -1.21427300 |
| C | -10.98760100 | -1.26217800 | 1.67732200  |
| H | -11.13209400 | -2.33626000 | 1.52311900  |
| H | -10.73460900 | -0.80074100 | 0.71593100  |
| H | -11.91685000 | -0.81003900 | 2.03461900  |
| C | -9.92068200  | -1.90010400 | -2.20226400 |
| O | -9.79608600  | -0.80606600 | -1.64923500 |
| C | -9.93233800  | 2.81032600  | -0.58350600 |
| O | -9.80643800  | 3.90639100  | -0.03480500 |
| C | -9.87174300  | -0.95101400 | 2.66420500  |
| O | -9.74640400  | 0.14624600  | 3.21064200  |
| N | -9.05393700  | -2.93045900 | -1.98794400 |
| H | -9.15797100  | -3.78033900 | -2.52838100 |
| C | -7.84907800  | -2.73991100 | -1.21203500 |
| C | -6.74425500  | -2.00764100 | -1.99613600 |
| H | -8.09014200  | -2.18860600 | -0.29767400 |
| H | -7.45366000  | -3.72106500 | -0.92536200 |
| O | -6.64075400  | -2.08919500 | -3.22029200 |
| N | -9.06656700  | 1.77993500  | -0.36545200 |
| H | -9.17165200  | 0.92805400  | -0.90252400 |
| C | -7.86124500  | 1.97229100  | 0.40929100  |
| C | -6.75595100  | 2.70036300  | -0.37804900 |
| H | -8.10143200  | 2.52741500  | 1.32157000  |
| H | -7.46672600  | 0.99186500  | 0.69966600  |
| O | -6.65295800  | 2.61391300  | -1.60191200 |
| N | -9.00492100  | -1.98021900 | 2.88368000  |
| H | -9.10964900  | -2.83325400 | 2.34837300  |
| C | -7.79921300  | -1.78528100 | 3.65717700  |
| C | -6.69511500  | -1.05781300 | 2.86760300  |
| H | -8.03923000  | -1.22855800 | 4.56852600  |
| H | -7.40363400  | -2.76478700 | 3.94921100  |
| O | -6.59292200  | -1.14659900 | 1.64384100  |
| N | -5.88272900  | -1.28674800 | -1.22354400 |

|   |             |             |             |
|---|-------------|-------------|-------------|
| H | -5.97437800 | -1.32803000 | -0.21602900 |
| C | -4.69599700 | -0.68835600 | -1.79242200 |
| C | -3.57340700 | -1.71229400 | -2.04344400 |
| H | -4.95796400 | -0.18064200 | -2.72607400 |
| H | -4.30733300 | 0.06091400  | -1.09332800 |
| O | -3.44182200 | -2.72677400 | -1.35829000 |
| N | -5.89342500 | 3.42339600  | 0.39142100  |
| H | -5.98476500 | 3.38615000  | 1.39912100  |
| C | -4.70628200 | 4.01834900  | -0.18020300 |
| C | -3.58482200 | 2.99229500  | -0.42760100 |
| H | -4.96805700 | 4.52267200  | -1.11574400 |
| H | -4.31661400 | 4.76995300  | 0.51582100  |
| O | -3.45402900 | 1.98037000  | 0.26147300  |
| N | -5.83266800 | -0.33250700 | 3.63502000  |
| H | -5.92325600 | -0.36783400 | 4.64285700  |
| C | -4.64645300 | 0.26234200  | 3.06136800  |
| C | -3.52427700 | -0.76322700 | 2.81520000  |
| H | -4.90933400 | 0.76458200  | 2.12501700  |
| H | -4.25694000 | 1.01566300  | 3.75562200  |
| O | -3.39211300 | -1.77367000 | 3.50618500  |
| N | -2.72980700 | -1.39047800 | -3.06500500 |
| H | -2.84457600 | -0.50110900 | -3.53515500 |
| C | -1.53028200 | -2.15948000 | -3.30955600 |
| C | -0.40229100 | -1.83875000 | -2.31134000 |
| H | -1.77070200 | -3.22678900 | -3.27556700 |
| H | -1.15772900 | -1.92484200 | -4.31322300 |
| O | -0.28654300 | -0.73369700 | -1.78088600 |
| N | -2.74124900 | 3.30925200  | -1.45070200 |
| H | -2.85527700 | 4.19689100  | -1.92429000 |
| C | -1.54259200 | 2.53807800  | -1.69265400 |
| C | -0.41392800 | 2.86156300  | -0.69608800 |
| H | -1.78408400 | 1.47115600  | -1.65440600 |
| H | -1.17014900 | 2.76840800  | -2.69735900 |
| O | -0.29687300 | 3.96856500  | -0.17000200 |
| N | -2.68171300 | -0.44756700 | 1.79086900  |
| H | -2.79685100 | 0.43903200  | 1.31560500  |
| C | -1.48255800 | -1.21817800 | 1.54958700  |
| C | -0.35346400 | -0.89173800 | 2.54470100  |
| H | -1.72309600 | -2.28523200 | 1.59012200  |
| H | -1.11103400 | -0.98951700 | 0.54416000  |
| O | -0.23699600 | 0.21640600  | 3.06850700  |
| N | 0.46457200  | -2.86647600 | -2.08519700 |
| H | 0.36069100  | -3.72248800 | -2.61589700 |

|   |            |             |             |
|---|------------|-------------|-------------|
| C | 1.66934700 | -2.66691700 | -1.31142500 |
| C | 2.77413500 | -1.94350800 | -2.10375900 |
| H | 1.42814100 | -2.10523300 | -0.40344100 |
| H | 2.06487100 | -3.64468000 | -1.01353200 |
| O | 2.87774000 | -2.03902900 | -3.32689500 |
| N | 0.45196800 | 1.83384800  | -0.46622200 |
| H | 0.34703200 | 0.97587300  | -0.99353300 |
| C | 1.65721400 | 2.03520700  | 0.30634900  |
| C | 2.76246100 | 2.75438500  | -0.48918800 |
| H | 1.41689400 | 2.60068500  | 1.21221200  |
| H | 2.05184700 | 1.05821500  | 0.60793100  |
| O | 2.86554400 | 2.65397300  | -1.71197700 |
| N | 0.51348900 | -1.91824400 | 2.77598200  |
| H | 0.40892300 | -2.77735400 | 2.25044800  |
| C | 1.71911100 | -1.71430800 | 3.54728900  |
| C | 2.82316400 | -0.99574900 | 2.74953600  |
| H | 1.47894700 | -1.14724400 | 4.45220100  |
| H | 2.11480900 | -2.69035700 | 3.85052400  |
| O | 2.92546000 | -1.09849500 | 1.52687500  |
| N | 3.63550700 | -1.21372200 | -1.33938800 |
| H | 3.54378700 | -1.24350300 | -0.33147400 |
| C | 4.82220500 | -0.62171200 | -1.91497700 |
| C | 5.94494700 | -1.64830400 | -2.15420000 |
| H | 4.56024300 | -0.12473300 | -2.85438800 |
| H | 5.21071700 | 0.13554700  | -1.22445900 |
| O | 6.07661300 | -2.65487300 | -1.45749000 |
| N | 3.62484000 | 3.48628000  | 0.27202500  |
| H | 3.53343900 | 3.46053700  | 1.28007900  |
| C | 4.81193900 | 4.07482400  | -0.30628400 |
| C | 5.93355400 | 3.04616200  | -0.54187300 |
| H | 4.55015700 | 4.56839000  | -1.24754300 |
| H | 5.20146100 | 4.83438400  | 0.38113200  |
| O | 6.06443800 | 2.04219400  | 0.15872600  |
| N | 3.68545000 | -0.26159900 | 3.50867900  |
| H | 3.59479300 | -0.28542300 | 4.51684700  |
| C | 4.87162300 | 0.32682800  | 2.92835500  |
| C | 5.99396400 | -0.70132500 | 2.69400100  |
| H | 4.60873900 | 0.81830000  | 1.98630700  |
| H | 5.26097600 | 1.08808700  | 3.61398400  |
| O | 6.12622200 | -1.70378800 | 3.39649300  |
| N | 6.78858300 | -1.33806900 | -3.17930700 |
| H | 6.67373500 | -0.45414400 | -3.65959600 |
| C | 7.98822700 | -2.10965700 | -3.41496600 |

|   |             |             |             |
|---|-------------|-------------|-------------|
| C | 9.11610100  | -1.77739600 | -2.42039500 |
| H | 7.74794500  | -3.17654000 | -3.36880400 |
| H | 8.36082700  | -1.88645200 | -4.42122100 |
| O | 9.23166300  | -0.66633900 | -1.90259200 |
| N | 6.77714900  | 3.35152400  | -1.56847500 |
| H | 6.66303200  | 4.23367900  | -2.05218000 |
| C | 7.97592600  | 2.57779900  | -1.80152500 |
| C | 9.10448200  | 2.91280200  | -0.80864900 |
| H | 7.73457600  | 1.51135000  | -1.75110600 |
| H | 8.34840300  | 2.79668600  | -2.80877300 |
| O | 9.22135400  | 4.02575800  | -0.29523800 |
| N | 6.83655900  | -0.39726600 | 1.66619100  |
| H | 6.72132900  | 0.48382900  | 1.18082000  |
| C | 8.03584100  | -1.17041100 | 1.43381600  |
| C | 9.16481500  | -0.83246100 | 2.42521700  |
| H | 7.79545400  | -2.23696700 | 1.48652100  |
| H | 8.40740800  | -0.95319800 | 0.42586900  |
| O | 9.28108600  | 0.28161100  | 2.93633800  |
| N | 9.99813900  | -2.79861500 | -2.22690300 |
| N | 9.98554900  | 1.89145000  | -0.61146400 |
| N | 10.04691000 | -1.85265500 | 2.62379400  |
| H | 9.75517800  | -3.71162500 | -2.59175800 |
| H | 9.74153300  | 0.97726700  | -0.97266100 |
| H | 9.80343100  | -2.76776400 | 2.26458500  |
| C | 11.13655400 | -2.69086300 | -1.32458700 |
| H | 10.92828000 | -3.16503800 | -0.35688400 |
| H | 12.02112000 | -3.15850100 | -1.77181400 |
| H | 11.33663800 | -1.63124000 | -1.15385300 |
| C | 11.12438700 | 2.00157300  | 0.29003200  |
| H | 10.91596600 | 1.53140100  | 1.25965500  |
| H | 12.00832100 | 1.53128900  | -0.15566500 |
| H | 11.32560600 | 3.06165200  | 0.45654900  |
| C | 11.18629600 | -1.73975600 | 3.52425400  |
| H | 10.97897800 | -2.20818700 | 4.49495600  |
| H | 12.07032000 | -2.21015600 | 3.07885700  |
| H | 11.38671300 | -0.67917500 | 3.68852600  |

### 3 strand anti parallel sheet

|   |           |          |          |
|---|-----------|----------|----------|
| C | -5.75127  | 4.21756  | 0.20953  |
| N | -4.53699  | 5.00709  | 0.18564  |
| H | -4.66752  | 6.01555  | 0.21396  |
| C | -3.32412  | 4.42028  | 0.1188   |
| O | -3.18273  | 3.19052  | 0.07175  |
| C | -2.12505  | 5.37022  | 0.11131  |
| N | -0.90429  | 4.60341  | -0.01244 |
| H | -0.96973  | 3.58339  | -0.00246 |
| C | -6.95515  | 5.16031  | 0.20806  |
| O | -6.81711  | 6.38876  | 0.23463  |
| N | -8.15676  | 4.53639  | 0.1838   |
| H | -8.21074  | 3.51626  | 0.13919  |
| C | -9.37606  | 5.3104   | 0.18483  |
| C | -10.59599 | 4.39216  | 0.26751  |
| O | -10.51271 | 3.16508  | 0.25283  |
| N | -11.78948 | 5.04557  | 0.34792  |
| H | -11.85086 | 6.05326  | 0.36952  |
| H | -5.80506  | 3.54491  | -0.65213 |
| H | -9.38636  | 6.0119   | 1.03008  |
| C | 2.26812   | 0.57273  | 0.04906  |
| C | 3.4805    | -0.34048 | -0.13988 |
| O | 3.36808   | -1.57552 | -0.15855 |
| N | 4.65628   | 0.31054  | -0.25605 |
| H | 4.67839   | 1.33184  | -0.26943 |
| C | 5.90696   | -0.4068  | -0.42028 |
| C | 7.08874   | 0.48033  | -0.02716 |
| O | 6.98557   | 1.71774  | 0.00517  |
| N | 8.23503   | -0.18275 | 0.22788  |
| H | 8.24362   | -1.20581 | 0.24569  |
| N | 1.03838   | -0.19267 | -0.01462 |
| H | 1.09759   | -1.21296 | -0.0408  |
| C | -0.15673  | 0.43018  | -0.01027 |
| O | -0.28392  | 1.66496  | 0.01933  |
| C | -1.36692  | -0.50255 | -0.03221 |
| N | -2.59672  | 0.26141  | -0.11807 |
| H | -2.54384  | 1.28018  | -0.06037 |
| H | 2.27838   | 1.36038  | -0.70964 |
| H | 5.90478   | -1.32316 | 0.17206  |
| H | -1.35016  | -1.12282 | 0.87288  |
| C | 1.48492   | 4.26194  | -0.24872 |
| N | 2.70844   | 5.03815  | -0.23059 |

|   |           |          |          |
|---|-----------|----------|----------|
| H | 2.58216   | 6.04722  | -0.19107 |
| C | 3.91922   | 4.44609  | -0.26105 |
| O | 4.0588    | 3.21569  | -0.30082 |
| C | 5.12147   | 5.39208  | -0.24723 |
| N | 6.34373   | 4.61988  | -0.17774 |
| H | 6.27606   | 3.60001  | -0.14254 |
| C | 7.54934   | 5.22876  | -0.1843  |
| O | 7.70839   | 6.45453  | -0.23925 |
| C | 0.29714   | 5.2166   | -0.10145 |
| O | 0.45418   | 6.44323  | -0.08003 |
| H | 1.38383   | 3.70146  | -1.18651 |
| H | 5.04248   | 6.08058  | 0.60512  |
| C | -4.9976   | 0.54974  | -0.35299 |
| C | -3.78381  | -0.36962 | -0.21912 |
| O | -3.89862  | -1.60461 | -0.23437 |
| N | -6.22595  | -0.1991  | -0.16163 |
| H | -6.18679  | -1.22044 | -0.20394 |
| C | -7.40174  | 0.43482  | 0.00969  |
| O | -7.51753  | 1.67205  | 0.0179   |
| C | -8.60622  | -0.48139 | 0.22744  |
| N | -9.83486  | 0.2885   | 0.20175  |
| H | -9.77799  | 1.30711  | 0.20473  |
| C | -11.04235 | -0.30298 | 0.20597  |
| O | -11.23491 | -1.52691 | 0.22103  |
| H | -4.96741  | 1.01161  | -1.35054 |
| H | -8.48224  | -0.99551 | 1.19069  |
| C | 9.45486   | 0.52823  | 0.55916  |
| H | 9.48219   | 1.48525  | 0.03637  |
| C | 8.74635   | 4.27355  | -0.11676 |
| H | 8.71505   | 3.58126  | -0.96568 |
| H | 9.82117   | 6.07103  | -0.18062 |
| C | 11.18682  | 4.51355  | -0.08074 |
| O | 11.41015  | 3.29857  | -0.01849 |
| N | 9.96124   | 5.06402  | -0.12907 |
| C | 10.69451  | -0.30245 | 0.21686  |
| H | 11.79396  | 1.45354  | 0.03557  |
| O | 10.6582   | -1.5345  | 0.14592  |
| N | 11.81954  | 0.43408  | 0.05531  |
| C | -5.74315  | -5.2967  | -0.28381 |
| N | -4.51434  | -4.53274 | -0.27031 |
| H | -4.58269  | -3.5131  | -0.27008 |
| C | -3.3079   | -5.14177 | -0.25424 |
| O | -3.14615  | -6.36773 | -0.24932 |

|   |           |          |          |
|---|-----------|----------|----------|
| C | -2.11712  | -4.17872 | -0.24415 |
| N | -0.8934   | -4.95215 | -0.1921  |
| H | -1.01733  | -5.96238 | -0.19929 |
| C | -6.93393  | -4.33635 | -0.24143 |
| O | -6.77788  | -3.10608 | -0.25606 |
| N | -8.15151  | -4.90979 | -0.19104 |
| H | -8.29745  | -5.91713 | -0.16693 |
| C | -9.35857  | -4.11111 | -0.14878 |
| C | -10.56445 | -5.04178 | 0.01711  |
| O | -10.43073 | -6.26774 | 0.01293  |
| N | -11.74285 | -4.38619 | 0.1529   |
| H | -11.77374 | -3.36761 | 0.18995  |
| H | -5.81058  | -5.92081 | -1.18597 |
| H | -2.19545  | -3.50079 | 0.61201  |
| H | -9.33055  | -3.39321 | 0.6764   |
| C | 1.51803   | -5.30049 | -0.08632 |
| N | 2.73567   | -4.52323 | -0.01437 |
| H | 2.66159   | -3.50554 | -0.06092 |
| C | 3.9441    | -5.12115 | 0.09646  |
| O | 4.11224   | -6.34507 | 0.13786  |
| C | 5.11977   | -4.14492 | 0.17704  |
| N | 6.35582   | -4.89646 | 0.23721  |
| H | 6.25654   | -5.90875 | 0.24213  |
| C | 7.55123   | -4.27264 | 0.28727  |
| O | 7.64728   | -3.03579 | 0.277    |
| C | 0.31436   | -4.35647 | -0.13    |
| O | 0.44994   | -3.12432 | -0.11254 |
| H | 1.51013   | -5.94318 | -0.97794 |
| H | 5.00124   | -3.50625 | 1.06089  |
| C | 8.77474   | -5.18221 | 0.3681   |
| H | 8.73417   | -5.93449 | -0.43137 |
| H | 9.92535   | -3.38035 | 0.23884  |
| C | 11.19985  | -5.00052 | 0.25238  |
| O | 11.38238  | -6.2166  | 0.30751  |
| N | 9.98493   | -4.39805 | 0.27044  |
| H | -2.12698  | 5.96495  | 1.03581  |
| H | 8.7414    | -5.74215 | 1.31467  |
| H | 9.50275   | 0.75208  | 1.63615  |
| H | 8.67893   | 3.65925  | 0.78748  |
| H | 5.10471   | 6.01546  | -1.15203 |
| H | -2.22118  | 6.08461  | -0.71727 |
| H | -9.45769  | 5.92284  | -0.72549 |
| H | -8.61882  | -1.26443 | -0.5357  |

|   |           |          |          |
|---|-----------|----------|----------|
| H | -5.79204  | 3.57861  | 1.09989  |
| H | -1.27776  | -1.19922 | -0.87215 |
| H | 1.47219   | 3.52013  | 0.55524  |
| H | -4.92667  | 1.36984  | 0.36509  |
| H | 2.36524   | 1.08291  | 1.0173   |
| H | 6.05527   | -0.71201 | -1.46731 |
| H | 5.10375   | -3.47527 | -0.68897 |
| H | 1.43169   | -5.97059 | 0.77971  |
| H | -5.78735  | -5.9827  | 0.57273  |
| H | -2.14992  | -3.54655 | -1.13901 |
| H | -9.48071  | -3.52681 | -1.06937 |
| H | 12.02666  | -4.26921 | 0.17934  |
| H | 12.68343  | -0.05751 | -0.13053 |
| H | 12.00355  | 5.25672  | -0.10162 |
| H | -12.63907 | 4.49931  | 0.39233  |
| H | -11.87501 | 0.42073  | 0.19167  |
| H | -12.58281 | -4.93542 | 0.27119  |



3 strand anti parallel sheet restricted with Cs symmetry

|   |               |                |               |
|---|---------------|----------------|---------------|
| C | -0.0068813737 | -5.910043775   | 0.000000000   |
| N | 0.6569957542  | -4.6217969168  | 0.000000000   |
| H | 1.6785174683  | -4.5978152338  | 0.000000000   |
| C | -0.0627162503 | -3.4832080649  | 0.000000000   |
| O | -1.3032482566 | -3.4590650659  | 0.000000000   |
| C | 0.7641973991  | -2.1987479534  | 0.000000000   |
| N | -0.1070989707 | -1.0408927312  | 0.000000000   |
| H | -1.118613138  | -1.1905182134  | 0.000000000   |
| C | 1.023340817   | -7.0368246128  | 0.000000000   |
| O | 2.2440427718  | -6.8049416381  | 0.000000000   |
| N | 0.5096009381  | -8.2819163941  | 0.000000000   |
| H | -0.5025510053 | -8.4319499619  | 0.000000000   |
| C | 1.3934447954  | -9.428143726   | 0.000000000   |
| C | 0.6046704346  | -10.7382135923 | 0.000000000   |
| O | -0.6291964531 | -10.7667714798 | 0.000000000   |
| N | 1.39299038    | -11.8399971053 | 0.000000000   |
| H | 2.4098289356  | -11.7629124065 | 0.000000000   |
| H | -0.6596206028 | -6.0185411018  | 0.8734334368  |
| H | 1.4249417058  | -2.1955421669  | -0.8745570439 |
| H | 2.0534537211  | -9.4150005775  | -0.8756626401 |
| C | -4.347620573  | 1.7557030482   | 0.000000000   |
| C | -5.4058331849 | 2.8631612519   | 0.000000000   |
| O | -6.6141792516 | 2.6005858068   | 0.000000000   |
| N | -4.8991897648 | 4.1163418545   | 0.000000000   |
| H | -3.8888912562 | 4.270028111    | 0.000000000   |
| C | -5.763635655  | 5.277006629    | 0.000000000   |
| C | -4.9061159927 | 6.5445722788   | 0.000000000   |
| O | -3.6673053791 | 6.4915006775   | 0.000000000   |
| N | -5.5784271985 | 7.7118973818   | 0.000000000   |
| H | -6.5945022609 | 7.7766864821   | 0.000000000   |
| N | -5.0167468224 | 0.4705790924   | 0.000000000   |
| H | -6.0337658273 | 0.5098218761   | 0.000000000   |
| C | -4.3209421185 | -0.6847010428  | 0.000000000   |
| O | -3.0818510721 | -0.7151458562  | 0.000000000   |
| C | -5.1592461615 | -1.9654126918  | 0.000000000   |
| N | -4.2821635697 | -3.1160973453  | 0.000000000   |
| H | -3.2734920943 | -2.9543040389  | 0.000000000   |
| H | -3.6993908456 | 1.8653271986   | 0.8763405142  |
| H | -6.4214485203 | 5.2773694343   | -0.8799789006 |
| H | -5.8175284276 | -1.9733133728  | -0.8797475567 |
| C | -0.6213449428 | 1.3287461067   | 0.000000000   |
| N | 0.0408771193  | 2.6178667243   | 0.000000000   |

|   |               |                |               |
|---|---------------|----------------|---------------|
| H | 1.0625006331  | 2.6418594368   | 0.000000000   |
| C | -0.6811584157 | 3.755677796    | 0.000000000   |
| O | -1.9213225046 | 3.7761536587   | 0.000000000   |
| C | 0.1454203832  | 5.0411163787   | 0.000000000   |
| N | -0.7213614744 | 6.2034963659   | 0.000000000   |
| H | -1.7345149683 | 6.0608140535   | 0.000000000   |
| C | -0.197441933  | 7.4434490562   | 0.000000000   |
| O | 1.0252553174  | 7.666052729    | 0.000000000   |
| C | 0.4105677918  | 0.2022262352   | 0.000000000   |
| O | 1.6306016637  | 0.4333739284   | 0.000000000   |
| H | -1.2734493353 | 1.2199821324   | 0.874308638   |
| H | 0.8059634056  | 5.0427750483   | -0.8747461406 |
| C | -3.7094134946 | -5.4716016745  | 0.000000000   |
| C | -4.7779491868 | -4.375146773   | 0.000000000   |
| O | -5.9842599903 | -4.6455613139  | 0.000000000   |
| N | -4.3585179063 | -6.7663351021  | 0.000000000   |
| H | -5.3755553655 | -6.7482548274  | 0.000000000   |
| C | -3.6421345601 | -7.9107350201  | 0.000000000   |
| O | -2.4019067627 | -7.9111622566  | 0.000000000   |
| C | -4.4542825743 | -9.2042341617  | 0.000000000   |
| N | -3.5670788363 | -10.3453374642 | 0.000000000   |
| H | -2.558788875  | -10.1961773771 | 0.000000000   |
| C | -4.0614583682 | -11.6081345672 | 0.000000000   |
| O | -5.2585718104 | -11.8942329769 | 0.000000000   |
| H | -3.0619039126 | -5.3527551028  | 0.8757016055  |
| H | -5.115179318  | -9.2216951916  | -0.8783632544 |
| C | -4.8797796593 | 8.9801201537   | 0.000000000   |
| H | -4.2315541523 | 9.0759179243   | 0.8780592136  |
| H | -4.2315541523 | 9.0759179243   | -0.8780592136 |
| C | -1.2179688158 | 8.5811725817   | 0.000000000   |
| H | -1.8701541266 | 8.4801935038   | -0.87518031   |
| H | -1.8701541266 | 8.4801935038   | 0.87518031    |
| H | 0.4792910672  | 9.8816042662   | 0.000000000   |
| C | -1.2239296175 | 11.0208344869  | 0.000000000   |
| O | -2.4594218981 | 11.1158522035  | 0.000000000   |
| N | -0.5408398959 | 9.8630044049   | 0.000000000   |
| H | 0.8059634056  | 5.0427750483   | 0.8747461406  |
| H | -1.2734493353 | 1.2199821324   | -0.874308638  |
| H | 1.4249417058  | -2.1955421669  | 0.8745570439  |
| H | -0.6596206028 | -6.0185411018  | -0.8734334368 |
| H | 2.0534537211  | -9.4150005775  | 0.8756626401  |
| H | -5.115179318  | -9.2216951916  | 0.8783632544  |
| H | -5.8175284276 | -1.9733133728  | 0.8797475567  |
| H | -6.4214485203 | 5.2773694343   | 0.8799789006  |

|   |               |                |               |
|---|---------------|----------------|---------------|
| C | -5.9083128411 | 10.1155643284  | 0.0000000000  |
| H | -4.3409078039 | 11.4726298082  | 0.0000000000  |
| O | -7.1191047336 | 9.8809171123   | 0.0000000000  |
| N | -5.3535373287 | 11.3519687575  | 0.0000000000  |
| H | -3.0619039126 | -5.3527551028  | -0.8757016055 |
| H | -3.6993908456 | 1.8653271986   | -0.8763405142 |
| C | 5.1698912053  | 2.5635710074   | 0.0000000000  |
| C | 4.1231821372  | 3.6798461433   | 0.0000000000  |
| O | 2.9089901616  | 3.4357811981   | 0.0000000000  |
| N | 4.6071071087  | 4.9393977453   | 0.0000000000  |
| H | 5.6013378068  | 5.1547943354   | 0.0000000000  |
| C | 3.718763683   | 6.0840216165   | 0.0000000000  |
| C | 4.5582468036  | 7.3620788848   | 0.0000000000  |
| O | 5.7943085723  | 7.3254735955   | 0.0000000000  |
| N | 3.8384395226  | 8.5091020306   | 0.0000000000  |
| H | 2.8162058214  | 8.4818394605   | 0.0000000000  |
| N | 4.5035852489  | 1.2789705856   | 0.0000000000  |
| H | 3.4814616653  | 1.2633451581   | 0.0000000000  |
| C | 5.2105643748  | 0.12646118     | 0.0000000000  |
| O | 6.4460885652  | 0.0694714297   | 0.0000000000  |
| C | 4.352220833   | -1.1413961811  | 0.0000000000  |
| N | 5.2266917251  | -2.2971000582  | 0.0000000000  |
| H | 6.2229339797  | -2.0893624145  | 0.0000000000  |
| H | 5.8195841973  | 2.6686255145   | 0.8798441895  |
| H | 3.060686139   | 6.0764330995   | -0.8757406494 |
| H | 3.69426325    | -1.1410302682  | -0.8758842083 |
| C | 5.7712857546  | -4.6759696038  | 0.0000000000  |
| C | 4.7326109823  | -3.5520659043  | 0.0000000000  |
| O | 3.5167393114  | -3.7888834813  | 0.0000000000  |
| N | 5.0977719342  | -5.9576964702  | 0.0000000000  |
| H | 4.0753685224  | -5.970654124   | 0.0000000000  |
| C | 5.8023889525  | -7.1101959985  | 0.0000000000  |
| O | 7.038450952   | -7.1673632644  | 0.0000000000  |
| C | 4.9487607798  | -8.3840894079  | 0.0000000000  |
| N | 5.8401874642  | -9.5276209301  | 0.0000000000  |
| H | 6.8323719468  | -9.2991829807  | 0.0000000000  |
| C | 5.4020591523  | -10.7990569734 | 0.0000000000  |
| O | 4.2116727387  | -11.1352592514 | 0.0000000000  |
| H | 6.4217764111  | -4.575897413   | 0.8797043562  |
| H | 4.2923904194  | -8.3905834178  | -0.8768105314 |
| C | 4.513340206   | 9.786074507    | 0.0000000000  |
| H | 5.1657720156  | 9.8831940322   | 0.8794829549  |
| H | 5.1657720156  | 9.8831940322   | -0.8794829549 |
| H | 4.2923904194  | -8.3905834178  | 0.8768105314  |

|   |               |                |               |
|---|---------------|----------------|---------------|
| H | 3.69426325    | -1.1410302682  | 0.8758842083  |
| H | 3.060686139   | 6.0764330995   | 0.8757406494  |
| C | 3.500177089   | 10.9314502806  | 0.000000000   |
| H | 5.0567176626  | 12.3176982812  | 0.000000000   |
| O | 2.2837413019  | 10.7502211819  | 0.000000000   |
| N | 4.0569592129  | 12.175719366   | 0.000000000   |
| H | 6.4217764111  | -4.575897413   | -0.8797043562 |
| H | 5.8195841973  | 2.6686255145   | -0.8798441895 |
| H | 6.2187589847  | -11.54293502   | 0.000000000   |
| H | 0.9452306966  | -12.7460371709 | 0.000000000   |
| H | -3.2592261027 | -12.3700537718 | 0.000000000   |
| H | -5.9713823988 | 12.1516172307  | 0.000000000   |
| H | -0.5679758153 | 11.9080393341  | 0.000000000   |
| H | 3.4452148124  | 12.9806626659  | 0.000000000   |

### 3 strand parallel pleated sheet

|   |              |             |             |
|---|--------------|-------------|-------------|
| C | -9.50338600  | -4.89078600 | 2.37246700  |
| O | -8.79436000  | -5.86863700 | 2.63288400  |
| H | -9.97195700  | -3.32489100 | 1.09270300  |
| N | -9.49383100  | -4.22313900 | 1.19441200  |
| C | -8.58287300  | -4.61681300 | 0.12796400  |
| C | -7.17719600  | -4.03696600 | 0.34724800  |
| O | -6.81953500  | -2.99417100 | -0.22533200 |
| H | -8.53962900  | -5.70987300 | 0.08445500  |
| H | -6.83072300  | -5.51758700 | 1.69331400  |
| N | -6.40682300  | -4.72262900 | 1.22010600  |
| C | -5.07174500  | -4.28691700 | 1.59393400  |
| C | -3.97231200  | -5.11992500 | 0.90876800  |
| O | -4.00122600  | -6.35100700 | 0.90695900  |
| H | -4.96714500  | -3.22693300 | 1.35517300  |
| H | -3.05857000  | -3.35917600 | 0.31753100  |
| N | -2.96692700  | -4.37461900 | 0.36606900  |
| C | -1.82151000  | -5.00267200 | -0.25978700 |
| C | -0.51967400  | -4.32307300 | 0.17223400  |
| O | -0.44797500  | -3.08804900 | 0.26687900  |
| H | -1.84132900  | -6.06525300 | -0.00253900 |
| H | 0.43945900   | -6.14360800 | 0.24139200  |
| N | 0.52630900   | -5.14738400 | 0.41010400  |
| C | 1.85400900   | -4.65512800 | 0.73037900  |
| C | 2.91006100   | -5.35473600 | -0.13006400 |
| O | 2.76170500   | -6.51726000 | -0.51617000 |
| H | 1.87800100   | -3.57345800 | 0.59797000  |
| H | 4.02118100   | -3.61456200 | -0.12579800 |
| N | 4.01952500   | -4.60661300 | -0.36401500 |
| C | 5.15249900   | -5.14848400 | -1.08146400 |
| C | 6.42147000   | -4.36131300 | -0.74724500 |
| O | 6.36231400   | -3.25584700 | -0.18463700 |
| H | 5.26934400   | -6.20718600 | -0.82641400 |
| H | 7.57199700   | -5.77592800 | -1.70438800 |
| N | 7.58107900   | -4.94217000 | -1.12346000 |
| C | 8.86392000   | -4.26997400 | -1.01805100 |
| C | 9.63156800   | -4.40039800 | -2.34005300 |
| O | 9.43384800   | -5.35054100 | -3.09766400 |
| H | 10.53696400  | -2.57499300 | -1.97242500 |
| N | 10.54956800  | -3.41884800 | -2.54191700 |
| H | 8.71427000   | -3.22344800 | -0.75255200 |
| C | -10.52187200 | -0.43727300 | 0.18569200  |
| O | -10.39084700 | -1.62449800 | 0.50743400  |

|   |              |             |             |
|---|--------------|-------------|-------------|
| H | -9.91334000  | 1.26311700  | -0.73771900 |
| N | -9.66897500  | 0.28333100  | -0.57254600 |
| C | -8.42755200  | -0.25750100 | -1.10716800 |
| C | -7.21454800  | 0.52600900  | -0.58588800 |
| O | -7.19200700  | 1.76697200  | -0.66401200 |
| H | -8.36050500  | -1.31558000 | -0.85024000 |
| H | -6.29107800  | -1.23324500 | -0.04517100 |
| N | -6.20804300  | -0.21079800 | -0.07259900 |
| C | -5.01683500  | 0.42335000  | 0.47522800  |
| C | -3.75587900  | -0.33527600 | 0.06245000  |
| O | -3.65414500  | -1.54920900 | 0.28017500  |
| H | -4.99442100  | 1.46263600  | 0.14791300  |
| H | -2.97586400  | 1.40047400  | -0.70375200 |
| N | -2.78622900  | 0.41532100  | -0.51611400 |
| C | -1.52138500  | -0.17031200 | -0.93189900 |
| C | -0.32209900  | 0.47824100  | -0.22994000 |
| O | -0.18641400  | 1.71346400  | -0.22314700 |
| H | -1.56246100  | -1.24298500 | -0.73659200 |
| H | 0.34150800   | -1.38252900 | 0.33200100  |
| N | 0.56275900   | -0.38211600 | 0.31929500  |
| C | 1.79128900   | 0.07819300  | 0.94980700  |
| C | 3.02296400   | -0.56384900 | 0.29903600  |
| O | 3.12719500   | -1.79643100 | 0.22756200  |
| H | 1.82409500   | 1.16686900  | 0.88718100  |
| H | 3.80134700   | 1.30552700  | -0.08087800 |
| N | 3.96113400   | 0.30005600  | -0.15757900 |
| C | 5.19923100   | -0.17560000 | -0.75449400 |
| C | 6.41880400   | 0.31824300  | 0.02738400  |
| O | 6.54481000   | 1.52721000  | 0.28260400  |
| H | 5.16296200   | -1.26456900 | -0.79651400 |
| H | 7.10841500   | -1.60392900 | 0.18121500  |
| N | 7.31793600   | -0.62151500 | 0.38373000  |
| C | 8.55375700   | -0.28190100 | 1.06746100  |
| C | 9.77838200   | -0.28903600 | 0.13204100  |
| O | 9.95365400   | -1.20674500 | -0.67962900 |
| H | 10.44976200  | 1.54107300  | 0.90021800  |
| N | 10.64860500  | 0.72803300  | 0.31359000  |
| H | 8.43785200   | 0.69210400  | 1.54681300  |
| C | -10.86147400 | 4.14810000  | -0.61902900 |
| O | -10.89673900 | 2.91509800  | -0.69105500 |
| H | -9.86021700  | 5.93012900  | -0.85792800 |
| N | -9.83728200  | 4.92877300  | -1.02418800 |
| C | -8.58659900  | 4.39208900  | -1.53343100 |
| C | -7.42250100  | 5.24588300  | -1.02599800 |

|   |             |             |             |
|---|-------------|-------------|-------------|
| O | -7.55795600 | 6.45792700  | -0.82546900 |
| H | -8.47940800 | 3.35004300  | -1.23128600 |
| H | -6.26188900 | 3.55130700  | -0.86372600 |
| N | -6.25240100 | 4.57352700  | -0.88160000 |
| C | -5.05108600 | 5.26727700  | -0.46394000 |
| C | -3.80991100 | 4.43477800  | -0.78947500 |
| O | -3.86299100 | 3.19895900  | -0.87098100 |
| H | -5.01506000 | 6.24763400  | -0.94966800 |
| H | -2.65031200 | 6.14585900  | -0.80307300 |
| N | -2.66506700 | 5.13998400  | -0.93816500 |
| C | -1.37401500 | 4.49779700  | -1.10795000 |
| C | -0.31175800 | 5.24025400  | -0.29476300 |
| O | -0.38896000 | 6.45723300  | -0.09971100 |
| H | -1.44159600 | 3.44956300  | -0.81728100 |
| H | 0.62606300  | 3.43621200  | 0.03506700  |
| N | 0.71122400  | 4.45130900  | 0.12786600  |
| C | 1.84692000  | 5.00413200  | 0.83800700  |
| C | 3.14971400  | 4.36566700  | 0.34821400  |
| O | 3.22877800  | 3.14752200  | 0.15295700  |
| H | 1.83285100  | 6.08903900  | 0.70206900  |
| H | 4.05435100  | 6.20804800  | 0.36487600  |
| N | 4.18954100  | 5.22292800  | 0.17428500  |
| C | 5.52252600  | 4.78661000  | -0.22247800 |
| C | 6.54875100  | 5.06437100  | 0.88518700  |
| O | 6.86115700  | 6.22384500  | 1.19614300  |
| H | 5.46697500  | 3.72328900  | -0.46243700 |
| H | 6.85622700  | 3.03761400  | 1.07586900  |
| N | 7.05762700  | 3.95907900  | 1.47650700  |
| C | 8.08396600  | 4.04887000  | 2.50424900  |
| C | 9.47324800  | 4.20105200  | 1.86338400  |
| O | 10.22777900 | 3.23606600  | 1.69431400  |
| H | 9.02892900  | 6.16425300  | 1.47227900  |
| N | 9.77376000  | 5.47075800  | 1.48695600  |
| H | 7.86849800  | 4.90229900  | 3.15437100  |
| H | -8.56683600 | 4.43182700  | -2.63277000 |
| H | -5.04793100 | 5.45233100  | 0.62244400  |
| H | -1.05930100 | 4.53171000  | -2.16158600 |
| H | 1.77988900  | 4.80273000  | 1.91843800  |
| H | 5.84177300  | 5.34676500  | -1.10920500 |
| H | 8.08458400  | 3.12859100  | 3.09252700  |
| H | 8.75025600  | -1.03088500 | 1.84440900  |
| H | 5.30016700  | 0.21752500  | -1.77519900 |
| H | 1.80296000  | -0.21941100 | 2.00687100  |
| H | -1.37237500 | -0.01040000 | -2.00862700 |

|   |              |             |             |
|---|--------------|-------------|-------------|
| H | -5.04735700  | 0.40259900  | 1.57454900  |
| H | -8.42007900  | -0.15976000 | -2.20140200 |
| H | -8.95736200  | -4.22246900 | -0.81881600 |
| H | -4.94312100  | -4.42588400 | 2.67424000  |
| H | -1.87284300  | -4.92239400 | -1.35706600 |
| H | 2.09748500   | -4.87266000 | 1.78079700  |
| H | 5.00514200   | -5.10244200 | -2.17258700 |
| H | 9.47821600   | -4.73141300 | -0.23180000 |
| H | 10.61140900  | 5.62316200  | 0.93934700  |
| H | 11.48379300  | 0.73641400  | -0.25835200 |
| H | 11.08726000  | -3.44633200 | -3.39813300 |
| H | -10.23042200 | -4.47920900 | 3.09630400  |
| H | -11.39482400 | 0.15799300  | 0.50483900  |
| H | -11.70636200 | 4.72824700  | -0.20533500 |



### 3 strand anti parallel rippled sheet

|   |              |            |             |
|---|--------------|------------|-------------|
| O | -6.38212300  | 6.42669600 | 1.33252700  |
| C | -6.50607500  | 5.20065500 | 1.25432000  |
| C | -5.30384700  | 4.26503800 | 1.29089800  |
| N | -7.70823200  | 4.57269400 | 1.17513800  |
| N | -4.11222900  | 5.00619700 | 0.92791600  |
| H | -5.22016100  | 3.85943300 | 2.31022800  |
| H | -5.44903700  | 3.41265300 | 0.62549900  |
| H | -7.75778600  | 3.57587500 | 0.96300800  |
| C | -8.92144100  | 5.35798700 | 1.17803900  |
| H | -4.16135200  | 6.01545900 | 1.03098900  |
| C | -3.02109100  | 4.38702200 | 0.43530900  |
| C | -10.14781300 | 4.45551200 | 1.26641200  |
| H | -9.01317200  | 5.96023200 | 0.26038300  |
| H | -8.90389400  | 6.06910500 | 2.01275200  |
| C | -1.87031900  | 5.29334100 | 0.00823500  |
| O | -2.95189700  | 3.15539200 | 0.29706300  |
| O | -10.09523200 | 3.24833400 | 1.02680100  |
| N | -11.30547800 | 5.09205300 | 1.58931100  |
| N | -0.61004300  | 4.60434800 | 0.19835500  |
| H | -2.03122800  | 5.55807000 | -1.04899300 |
| H | -1.86027100  | 6.23165900 | 0.57212500  |
| H | -11.32935100 | 6.07504500 | 1.82021700  |
| C | 0.55912400   | 5.29284400 | 0.20597400  |
| H | -0.59722900  | 3.58336600 | 0.16385600  |
| C | 1.78546200   | 4.43288900 | 0.49898800  |
| O | 0.64694900   | 6.51437600 | 0.04479000  |
| N | 2.96777600   | 5.06721000 | -0.05227500 |
| H | 1.86845300   | 4.33509200 | 1.59191400  |
| H | 1.67210200   | 3.42764500 | 0.09214400  |
| C | 4.01865700   | 4.34340900 | -0.49288900 |
| H | 2.93242800   | 6.07701700 | -0.15123500 |
| C | 5.15144600   | 5.13807700 | -1.13957100 |
| O | 4.06533600   | 3.10666400 | -0.41382000 |
| N | 6.41034700   | 4.44711000 | -0.94231100 |
| H | 4.91568200   | 5.24532800 | -2.21014700 |
| H | 5.21743800   | 6.15119500 | -0.72845500 |
| C | 7.58309700   | 5.05945300 | -1.23615700 |
| H | 6.39682800   | 3.44101200 | -0.75559200 |
| C | 8.82748400   | 4.23073100 | -0.91475900 |
| O | 7.67404500   | 6.20922300 | -1.68245600 |
| N | 9.92390600   | 4.66870500 | -1.76006400 |
| H | 9.06664700   | 4.38623400 | 0.14782500  |

|   |             |             |             |
|---|-------------|-------------|-------------|
| H | 8.63968700  | 3.16547500  | -1.05387800 |
| C | 10.88867500 | 3.83394700  | -2.19704600 |
| H | 9.86888700  | 5.62380000  | -2.10145100 |
| O | 10.99017000 | 2.63829200  | -1.89922600 |
| O | 0.33274200  | 1.72861900  | -0.06981500 |
| C | 0.38979200  | 0.50361300  | -0.25994500 |
| C | 1.61818300  | -0.13475000 | -0.92331000 |
| N | -0.61713800 | -0.35591500 | 0.03326700  |
| N | 2.87074900  | 0.35950100  | -0.36947100 |
| H | 1.60881900  | -1.22023200 | -0.82207200 |
| H | 1.55334900  | 0.11468300  | -1.99258800 |
| H | -0.43636300 | -1.35825100 | -0.05240500 |
| C | -1.85415200 | 0.09940500  | 0.65174500  |
| C | 3.86511100  | -0.48487300 | 0.00321600  |
| H | 3.06339400  | 1.36211500  | -0.37339300 |
| O | 0.51201800  | -3.08437500 | -0.10163900 |
| C | -3.10675400 | -0.42608100 | -0.06642300 |
| H | -1.83801600 | 1.18902200  | 0.67996100  |
| H | -1.91644900 | -0.27237700 | 1.68500400  |
| C | 5.10919800  | 0.19447300  | 0.59303700  |
| O | 3.78518100  | -1.72031000 | -0.06587900 |
| C | 0.43094100  | -4.32236600 | -0.04553400 |
| O | -3.20049100 | -1.61437900 | -0.40514800 |
| N | -4.09532800 | 0.48984100  | -0.23339200 |
| N | 6.34740200  | -0.37230100 | 0.08266900  |
| H | 5.11344600  | 1.26525000  | 0.38897600  |
| H | 5.05280600  | 0.04524300  | 1.68082900  |
| C | 1.54809700  | -5.15325800 | 0.57995300  |
| N | -0.64026800 | -5.00674600 | -0.49342800 |
| H | -3.88886600 | 1.46702900  | -0.01734800 |
| C | -5.35664400 | 0.15231300  | -0.88214900 |
| C | 7.30300300  | 0.39875500  | -0.48582000 |
| H | 6.56467400  | -1.35403300 | 0.26843200  |
| N | 2.83180600  | -4.56201700 | 0.25417100  |
| H | 1.37712300  | -5.17424900 | 1.66787000  |
| H | 1.52789700  | -6.19182400 | 0.23449400  |
| H | -0.69972100 | -6.01835800 | -0.42625200 |
| C | -1.80307600 | -4.33187400 | -1.03748300 |
| C | -6.57405900 | 0.53335700  | -0.02398200 |
| H | -5.34427500 | -0.91525000 | -1.10669300 |
| H | -5.45216800 | 0.71036100  | -1.82367800 |
| C | 8.55352100  | -0.35469300 | -0.97188900 |
| O | 7.19524100  | 1.62318000  | -0.65562400 |
| C | 3.98139600  | -5.25737200 | 0.45018000  |

|   |              |             |             |
|---|--------------|-------------|-------------|
| H | 2.87420300   | -3.55908100 | 0.06358100  |
| C | -3.03874200  | -5.20041200 | -0.81992100 |
| H | -1.69156500  | -4.17449300 | -2.12079700 |
| H | -1.92215200  | -3.34902100 | -0.58040400 |
| O | -6.73909500  | 1.69800500  | 0.37287700  |
| N | -7.43787300  | -0.47886300 | 0.23158700  |
| N | 9.78939600   | 0.31072900  | -0.59643400 |
| H | 8.57242900   | -1.37264400 | -0.57938700 |
| H | 8.48458400   | -0.39725000 | -2.06651500 |
| C | 5.23825000   | -4.53101900 | -0.02331500 |
| O | 4.03004700   | -6.40081200 | 0.91450900  |
| O | -2.95602600  | -6.42687300 | -0.70074200 |
| N | -4.20807100  | -4.51370400 | -0.82529100 |
| H | -7.21517900  | -1.41648600 | -0.11394700 |
| C | -8.62308000  | -0.28905500 | 1.05716800  |
| C | 10.58946700  | -0.15636500 | 0.39025600  |
| H | 10.09378200  | 1.15411000  | -1.08977600 |
| N | 6.38560700   | -4.98038100 | 0.74384500  |
| H | 5.36650400   | -4.76274500 | -1.09167800 |
| H | 5.12953600   | -3.44983500 | 0.06721900  |
| H | -4.20406200  | -3.49567300 | -0.75334300 |
| C | -5.47171700  | -5.21061500 | -0.69997700 |
| C | -9.92819200  | -0.49532000 | 0.26909800  |
| H | -8.57228300  | 0.71233800  | 1.48898800  |
| H | -8.62793700  | -1.03111100 | 1.86469200  |
| O | 10.38585500  | -1.15852800 | 1.08172300  |
| C | 7.41710300   | -4.15394200 | 1.02721700  |
| H | 6.33934100   | -5.92292200 | 1.11821800  |
| C | -6.61878100  | -4.24970900 | -1.00217100 |
| H | -5.61798900  | -5.59811500 | 0.32057200  |
| H | -5.48542900  | -6.07631400 | -1.37071800 |
| O | -10.24200900 | -1.61483200 | -0.15813100 |
| N | -10.69753900 | 0.60167800  | 0.10104400  |
| C | 8.53692800   | -4.75380400 | 1.87416900  |
| O | 7.46007100   | -2.98029200 | 0.62929400  |
| O | -6.50207900  | -3.03093900 | -0.78953500 |
| N | -7.74444300  | -4.81737100 | -1.47692100 |
| H | -10.43491500 | 1.52381900  | 0.44492000  |
| N | 9.61346700   | -3.80256800 | 2.02582100  |
| H | 8.13032300   | -5.04548100 | 2.85374300  |
| H | 8.89490000   | -5.68221100 | 1.40648000  |
| H | -7.82860500  | -5.82635300 | -1.56705300 |
| C | -8.96918100  | -4.06837100 | -1.68627200 |
| H | 9.55429000   | -2.88579200 | 1.57926900  |

|   |              |             |             |
|---|--------------|-------------|-------------|
| C | 10.71516000  | -4.12201500 | 2.74945100  |
| C | -10.16792800 | -4.95077100 | -1.32275400 |
| H | -9.07523900  | -3.78108400 | -2.74250800 |
| H | -8.95614300  | -3.15427900 | -1.09222800 |
| O | 10.88937800  | -5.19860600 | 3.32254600  |
| O | -10.09738400 | -6.17831600 | -1.38542500 |
| N | -11.28543200 | -4.24931100 | -0.99097900 |
| H | -11.20051000 | -3.26981000 | -0.72828800 |
| H | -12.09994500 | -4.77785300 | -0.70682900 |
| H | -11.56049500 | 0.49399900  | -0.41675500 |
| H | -12.16371600 | 4.55834800  | 1.62594900  |
| H | 11.61499700  | 4.32610300  | -2.86915000 |
| H | 11.49100700  | 0.46852800  | 0.52358900  |
| H | 11.45248300  | -3.29881700 | 2.77059200  |

### 3 strand anti parallel sheets with strands equivalent

|   |              |             |             |
|---|--------------|-------------|-------------|
| C | 12.46280800  | 5.13007300  | -0.00038800 |
| H | 12.20537700  | 6.19195900  | -0.02786600 |
| H | 13.07733700  | 4.87123800  | -0.86640600 |
| H | 13.04983400  | 4.91291600  | 0.89564400  |
| C | -12.31626400 | 0.54392800  | 0.00096100  |
| H | -12.05766300 | 1.60552600  | 0.02858100  |
| H | -12.93107800 | 0.28565400  | 0.86694400  |
| H | -12.90352800 | 0.32753900  | -0.89510000 |
| C | 12.45773800  | -4.06971800 | -0.00100600 |
| H | 12.20030700  | -3.00783200 | -0.02848300 |
| H | 13.07226600  | -4.32855400 | -0.86702400 |
| H | 13.04476300  | -4.28687500 | 0.89502600  |
| C | 11.23905600  | 4.23570100  | 0.00143000  |
| O | 11.34336500  | 3.00145400  | 0.00707000  |
| C | -11.09349800 | -0.35179300 | -0.00097700 |
| O | -11.19916800 | -1.58592200 | -0.00678300 |
| C | 11.23398600  | -4.96409100 | 0.00081200  |
| O | 11.33829500  | -6.19833700 | 0.00645200  |
| N | 10.02673500  | 4.84391600  | -0.00217200 |
| H | 9.95447700   | 5.86098300  | -0.00566200 |
| C | 8.79949200   | 4.07310800  | -0.00021600 |
| C | 7.59744400   | 5.01668400  | -0.00204700 |
| H | 8.74627100   | 3.41473400  | -0.87515800 |
| H | 8.74695800   | 3.41818900  | 0.87732900  |
| O | 7.74412200   | 6.24661900  | -0.00676200 |
| N | -9.88050800  | 0.25508600  | 0.00270700  |
| H | -9.80712900  | 1.27207200  | 0.00633300  |
| C | -8.65411500  | -0.51707400 | 0.00064600  |
| C | -7.45102800  | 0.42517600  | 0.00260400  |
| H | -8.60162000  | -1.17562400 | 0.87550000  |
| H | -8.60230300  | -1.17193300 | -0.87698600 |
| O | -7.59635000  | 1.65527100  | 0.00748500  |
| N | 10.02166500  | -4.35587500 | -0.00279000 |
| H | 9.94940700   | -3.33880800 | -0.00627900 |
| C | 8.79442100   | -5.12668300 | -0.00083300 |
| C | 7.59237400   | -4.18310700 | -0.00266400 |
| H | 8.74120000   | -5.78505700 | -0.87577600 |
| H | 8.74188800   | -5.78160200 | 0.87671100  |
| O | 7.73905200   | -2.95317300 | -0.00738000 |
| N | 6.38815400   | 4.42011200  | 0.00152300  |
| H | 6.30907200   | 3.40355300  | 0.00490700  |
| C | 5.16611100   | 5.19913900  | -0.00029800 |

|   |             |             |             |
|---|-------------|-------------|-------------|
| C | 3.95775800  | 4.26365000  | 0.00148500  |
| H | 5.11734700  | 5.85776100  | 0.87471800  |
| H | 5.11793500  | 5.85449000  | -0.87776900 |
| O | 4.09618000  | 3.03275800  | 0.00606300  |
| N | -6.24239600 | -0.17272800 | -0.00104600 |
| H | -6.16443500 | -1.18937300 | -0.00456600 |
| C | -5.01949500 | 0.60495100  | 0.00087900  |
| C | -3.81217500 | -0.33186900 | -0.00102900 |
| H | -4.97000500 | 1.26363700  | -0.87404700 |
| H | -4.97059700 | 1.26013100  | 0.87843900  |
| O | -3.95195300 | -1.56260600 | -0.00577300 |
| N | 6.38308400  | -4.77967900 | 0.00090500  |
| H | 6.30400200  | -5.79623800 | 0.00428900  |
| C | 5.16104000  | -4.00065300 | -0.00091500 |
| C | 3.95268800  | -4.93614100 | 0.00086800  |
| H | 5.11227700  | -3.34203000 | 0.87410000  |
| H | 5.11286500  | -3.34530100 | -0.87838700 |
| O | 4.09111000  | -6.16703300 | 0.00544500  |
| N | 2.75249900  | 4.86832400  | -0.00196700 |
| H | 2.68024000  | 5.88539200  | -0.00523900 |
| C | 1.52525500  | 4.09751600  | -0.00017600 |
| C | 0.32320800  | 5.04109200  | -0.00180600 |
| H | 1.47203500  | 3.43932900  | -0.87526000 |
| H | 1.47272100  | 3.44240900  | 0.87722800  |
| O | 0.46988600  | 6.27102800  | -0.00625900 |
| N | -2.60624900 | 0.27147600  | 0.00250500  |
| H | -2.53287000 | 1.28846300  | 0.00591300  |
| C | -1.37985600 | -0.50068400 | 0.00061000  |
| C | -0.17676900 | 0.44156600  | 0.00236700  |
| H | -1.32736100 | -1.15904700 | 0.87560500  |
| H | -1.32804400 | -1.15573100 | -0.87688200 |
| O | -0.32209200 | 1.67166200  | 0.00698400  |
| N | 2.74742900  | -4.33146700 | -0.00258500 |
| H | 2.67517000  | -3.31440000 | -0.00585700 |
| C | 1.52018500  | -5.10227600 | -0.00079400 |
| C | 0.31813800  | -4.15869900 | -0.00242400 |
| H | 1.46696500  | -5.76046300 | -0.87587800 |
| H | 1.46765100  | -5.75738300 | 0.87661000  |
| O | 0.46481600  | -2.92876400 | -0.00687700 |
| N | -0.88608200 | 4.44451900  | 0.00163500  |
| H | -0.96516400 | 3.42795900  | 0.00480100  |
| C | -2.10812600 | 5.22354600  | -0.00002000 |
| C | -3.31647800 | 4.28805700  | 0.00156200  |
| H | -2.15689000 | 5.88198200  | 0.87513600  |

|   |              |             |             |
|---|--------------|-------------|-------------|
| H | -2.15630000  | 5.87908500  | -0.87735200 |
| O | -3.17805700  | 3.05716500  | 0.00587600  |
| N | 1.03186300   | -0.15633900 | -0.00115500 |
| H | 1.10982400   | -1.17298500 | -0.00445700 |
| C | 2.25476400   | 0.62134100  | 0.00060500  |
| C | 3.46208400   | -0.31547900 | -0.00110300 |
| H | 2.30425400   | 1.27983900  | -0.87446300 |
| H | 2.30366100   | 1.27670800  | 0.87802400  |
| O | 3.32230600   | -1.54621800 | -0.00558300 |
| N | -0.89115200  | -4.75527200 | 0.00101700  |
| H | -0.97023400  | -5.77183200 | 0.00418300  |
| C | -2.11319600  | -3.97624500 | -0.00063800 |
| C | -3.32154800  | -4.91173400 | 0.00094400  |
| H | -2.16196000  | -3.31781000 | 0.87451800  |
| H | -2.16137100  | -3.32070600 | -0.87797000 |
| O | -3.18312700  | -6.14262700 | 0.00525900  |
| N | -4.52173800  | 4.89273200  | -0.00176200 |
| H | -4.59399600  | 5.90980000  | -0.00481600 |
| C | -5.74898100  | 4.12192300  | -0.00013700 |
| C | -6.95102900  | 5.06550000  | -0.00156600 |
| H | -5.80220100  | 3.46392400  | -0.87536200 |
| H | -5.80151600  | 3.46662800  | 0.87712700  |
| O | -6.80435100  | 6.29543600  | -0.00575500 |
| N | 4.66801000   | 0.28786600  | 0.00230200  |
| H | 4.74138900   | 1.30485400  | 0.00549300  |
| C | 5.89440300   | -0.48429500 | 0.00057400  |
| C | 7.09749000   | 0.45795600  | 0.00212900  |
| H | 5.94689700   | -1.14247000 | 0.87571000  |
| H | 5.94621600   | -1.13952900 | -0.87677800 |
| O | 6.95216700   | 1.68805300  | 0.00648300  |
| N | -4.52680800  | -4.30705900 | -0.00238000 |
| H | -4.59906600  | -3.28999100 | -0.00543400 |
| C | -5.75405100  | -5.07786800 | -0.00075500 |
| C | -6.95609900  | -4.13429100 | -0.00218400 |
| H | -5.80727100  | -5.73586800 | -0.87597900 |
| H | -5.80658600  | -5.73316300 | 0.87650900  |
| O | -6.80942100  | -2.90435500 | -0.00637300 |
| N | -8.16031900  | 4.46892600  | 0.00174600  |
| H | -8.23940000  | 3.45236600  | 0.00469500  |
| C | -9.38236200  | 5.24795400  | 0.00025800  |
| C | -10.59071400 | 4.31246400  | 0.00163800  |
| H | -9.43112700  | 5.90620200  | 0.87555500  |
| H | -9.43053600  | 5.90368000  | -0.87693400 |
| O | -10.45229300 | 3.08157100  | 0.00569000  |

|   |              |             |             |
|---|--------------|-------------|-------------|
| N | 8.30612100   | -0.13994900 | -0.00126400 |
| H | 8.38408300   | -1.15659600 | -0.00434900 |
| C | 9.52902300   | 0.63773000  | 0.00033000  |
| C | 10.73634300  | -0.29909000 | -0.00117700 |
| H | 9.57851400   | 1.29604200  | -0.87487900 |
| H | 9.57792000   | 1.29328600  | 0.87760900  |
| O | 10.59656500  | -1.52983000 | -0.00539300 |
| N | -8.16538900  | -4.73086500 | 0.00112900  |
| H | -8.24447100  | -5.74742600 | 0.00407700  |
| C | -9.38743200  | -3.95183800 | -0.00036000 |
| C | -10.59578400 | -4.88732700 | 0.00102000  |
| H | -9.43619800  | -3.29359000 | 0.87493700  |
| H | -9.43560600  | -3.29611100 | -0.87755200 |
| O | -10.45736300 | -6.11822000 | 0.00507200  |
| N | -11.79597400 | 4.91714000  | -0.00155700 |
| H | -11.86823200 | 5.93420900  | -0.00439400 |
| C | -13.02321800 | 4.14633100  | -0.00009800 |
| H | -13.08612400 | 3.49584700  | -0.87957600 |
| H | -13.09767200 | 3.51544200  | 0.89289400  |
| N | 11.94226900  | 0.30425600  | 0.00210000  |
| H | 12.09096600  | 1.31299000  | 0.00396000  |
| C | 13.10793600  | -0.55684400 | 0.00098900  |
| H | 13.12161400  | -1.20990600 | 0.88069900  |
| H | 13.13466800  | -1.19186700 | -0.89177600 |
| N | -11.80104400 | -4.28265100 | -0.00217500 |
| H | -11.87330300 | -3.26558300 | -0.00501100 |
| C | -13.02828800 | -5.05346100 | -0.00071600 |
| H | -13.09119400 | -5.70394400 | -0.88019300 |
| H | -13.10274200 | -5.68434900 | 0.89227600  |
| H | -13.87195600 | 4.83617400  | -0.01309000 |
| H | 14.00624600  | 0.06708400  | 0.01379100  |
| H | -13.87702600 | -4.36361700 | -0.01370800 |



### 3 strand parallel sheet with strands equivalent

|   |             |             |             |
|---|-------------|-------------|-------------|
| H | 11.86566700 | -6.14491200 | 0.66645300  |
| C | 11.90322300 | -5.05347700 | 0.70689000  |
| H | 11.96511200 | -4.72761600 | 1.75096000  |
| H | 12.80152800 | -4.69194700 | 0.19645200  |
| H | 11.89583800 | -1.30827100 | 0.66123400  |
| C | 11.93339400 | -0.21683600 | 0.70167100  |
| H | 11.99528300 | 0.10902400  | 1.74574100  |
| H | 12.83169900 | 0.14469300  | 0.19123200  |
| H | 11.92600900 | 3.52837000  | 0.65601500  |
| C | 11.96356500 | 4.61980500  | 0.69645200  |
| H | 12.02545400 | 4.94566500  | 1.74052200  |
| H | 12.86187000 | 4.98133400  | 0.18601300  |
| C | 10.68787800 | -4.39126800 | 0.07579500  |
| O | 10.61215200 | -3.16078500 | -0.03356900 |
| C | 10.71804900 | 0.44537300  | 0.07057600  |
| O | 10.64232300 | 1.67585500  | -0.03878800 |
| C | 10.74822000 | 5.28201300  | 0.06535700  |
| O | 10.67249400 | 6.51249600  | -0.04400800 |
| N | 9.69602000  | -5.23428700 | -0.32404600 |
| H | 9.83989300  | -6.24035100 | -0.25740000 |
| C | 8.45328300  | -4.74234000 | -0.89681300 |
| C | 7.24623500  | -5.41724000 | -0.23826100 |
| H | 8.43235500  | -3.65740500 | -0.78211000 |
| H | 8.40376900  | -4.98060000 | -1.96917700 |
| O | 7.18952200  | -6.64997500 | -0.13534600 |
| N | 9.72619000  | -0.39764700 | -0.32926500 |
| H | 9.87006400  | -1.40371000 | -0.26261900 |
| C | 8.48345400  | 0.09430100  | -0.90203200 |
| C | 7.27640600  | -0.58060000 | -0.24348000 |
| H | 8.46252600  | 1.17923600  | -0.78733000 |
| H | 8.43394000  | -0.14395900 | -1.97439600 |
| O | 7.21969300  | -1.81333400 | -0.14056500 |
| N | 9.75636100  | 4.43899400  | -0.33448400 |
| H | 9.90023500  | 3.43293100  | -0.26783800 |
| C | 8.51362500  | 4.93094100  | -0.90725100 |
| C | 7.30657700  | 4.25604100  | -0.24869900 |
| H | 8.49269700  | 6.01587700  | -0.79254900 |
| H | 8.46411100  | 4.69268100  | -1.97961500 |
| O | 7.24986400  | 3.02330600  | -0.14578400 |
| N | 6.26851300  | -4.57605900 | 0.17821000  |
| H | 6.41277100  | -3.57031600 | 0.10768300  |

|   |             |             |             |
|---|-------------|-------------|-------------|
| C | 5.03647000  | -5.06526400 | 0.77588600  |
| C | 3.81783000  | -4.38893800 | 0.14055300  |
| H | 5.01142100  | -6.15027800 | 0.66275800  |
| H | 5.00852100  | -4.82582900 | 1.84876600  |
| O | 3.76121600  | -3.15621100 | 0.03748100  |
| N | 6.29868400  | 0.26058100  | 0.17299100  |
| H | 6.44294200  | 1.26632500  | 0.10246400  |
| C | 5.06664100  | -0.22862400 | 0.77066600  |
| C | 3.84800100  | 0.44770300  | 0.13533400  |
| H | 5.04159200  | -1.31363700 | 0.65753900  |
| H | 5.03869100  | 0.01081200  | 1.84354700  |
| O | 3.79138700  | 1.68042900  | 0.03226200  |
| N | 6.32885500  | 5.09722200  | 0.16777200  |
| H | 6.47311300  | 6.10296600  | 0.09724500  |
| C | 5.09681200  | 4.60801700  | 0.76544700  |
| C | 3.87817200  | 5.28434400  | 0.13011400  |
| H | 5.07176300  | 3.52300400  | 0.65231900  |
| H | 5.06886200  | 4.84745300  | 1.83832800  |
| O | 3.82155800  | 6.51707000  | 0.02704300  |
| N | 2.83064300  | -5.22884100 | -0.25567500 |
| H | 2.97453800  | -6.23476200 | -0.18695000 |
| C | 1.58789600  | -4.73810400 | -0.82945500 |
| C | 0.38086200  | -5.41166700 | -0.16950800 |
| H | 1.56694600  | -3.65293500 | -0.71699500 |
| H | 1.53838500  | -4.97858100 | -1.90132400 |
| O | 0.32417500  | -6.64418700 | -0.06404500 |
| N | 2.86081400  | -0.39220100 | -0.26089400 |
| H | 3.00470800  | -1.39812100 | -0.19216900 |
| C | 1.61806700  | 0.09853600  | -0.83467500 |
| C | 0.41103300  | -0.57502600 | -0.17472700 |
| H | 1.59711700  | 1.18370600  | -0.72221400 |
| H | 1.56855600  | -0.14194000 | -1.90654300 |
| O | 0.35434600  | -1.80754700 | -0.06926400 |
| N | 2.89098500  | 4.44444000  | -0.26611300 |
| H | 3.03487900  | 3.43851900  | -0.19738800 |
| C | 1.64823800  | 4.93517700  | -0.83989400 |
| C | 0.44120400  | 4.26161500  | -0.17994600 |
| H | 1.62728800  | 6.02034700  | -0.72743400 |
| H | 1.59872700  | 4.69470000  | -1.91176200 |
| O | 0.38451700  | 3.02909400  | -0.07448300 |
| N | -0.59687600 | -4.56964700 | 0.24522600  |
| H | -0.45263800 | -3.56404800 | 0.17262000  |
| C | -1.82890800 | -5.05764000 | 0.84391300  |

|   |             |             |             |
|---|-------------|-------------|-------------|
| C | -3.04756200 | -4.38265300 | 0.20718600  |
| H | -1.85393500 | -6.14288600 | 0.73302800  |
| H | -1.85686000 | -4.81598900 | 1.91629700  |
| O | -3.10420100 | -3.15014400 | 0.10156700  |
| N | -0.56670500 | 0.26699400  | 0.24000600  |
| H | -0.42246700 | 1.27259300  | 0.16740100  |
| C | -1.79873700 | -0.22100000 | 0.83869400  |
| C | -3.01739100 | 0.45398800  | 0.20196700  |
| H | -1.82376400 | -1.30624500 | 0.72780900  |
| H | -1.82668900 | 0.02065200  | 1.91107800  |
| O | -3.07403000 | 1.68649700  | 0.09634800  |
| N | -0.53653400 | 5.10363500  | 0.23478700  |
| H | -0.39229600 | 6.10923300  | 0.16218200  |
| C | -1.76856600 | 4.61564100  | 0.83347500  |
| C | -2.98722000 | 5.29062800  | 0.19674800  |
| H | -1.79359300 | 3.53039600  | 0.72259000  |
| H | -1.79651800 | 4.85729300  | 1.90585800  |
| O | -3.04385900 | 6.52313800  | 0.09112900  |
| N | -4.03473300 | -5.22339400 | -0.18730300 |
| H | -3.89081800 | -6.22916800 | -0.11649900 |
| C | -5.27749100 | -4.73386900 | -0.76209400 |
| C | -6.48451000 | -5.40609100 | -0.10075400 |
| H | -5.29846300 | -3.64847000 | -0.65187700 |
| H | -5.32699900 | -4.97656200 | -1.83346400 |
| O | -6.54117100 | -6.63839200 | 0.00725600  |
| N | -4.00456200 | -0.38675400 | -0.19252200 |
| H | -3.86064700 | -1.39252700 | -0.12171900 |
| C | -5.24732000 | 0.10277100  | -0.76731300 |
| C | -6.45433900 | -0.56945000 | -0.10597300 |
| H | -5.26829200 | 1.18817100  | -0.65709600 |
| H | -5.29682800 | -0.13992100 | -1.83868300 |
| O | -6.51100100 | -1.80175100 | 0.00203700  |
| N | -3.97439100 | 4.44988700  | -0.19774100 |
| H | -3.83047600 | 3.44411400  | -0.12693800 |
| C | -5.21714900 | 4.93941200  | -0.77253300 |
| C | -6.42416800 | 4.26719000  | -0.11119200 |
| H | -5.23812100 | 6.02481100  | -0.66231500 |
| H | -5.26665700 | 4.69672000  | -1.84390200 |
| O | -6.48083000 | 3.03488900  | -0.00318200 |
| N | -7.46226400 | -4.56323600 | 0.31224000  |
| H | -7.31804700 | -3.55778600 | 0.23755600  |
| C | -8.69428500 | -5.05001600 | 0.91193700  |
| C | -9.91295400 | -4.37637100 | 0.27381900  |

|   |              |             |             |
|---|--------------|-------------|-------------|
| H | -8.71929000  | -6.13548900 | 0.80329500  |
| H | -8.72224100  | -4.80614900 | 1.98381900  |
| O | -9.96961900  | -3.14408400 | 0.16565300  |
| N | -7.43209300  | 0.27340500  | 0.30702100  |
| H | -7.28787600  | 1.27885500  | 0.23233700  |
| C | -8.66411400  | -0.21337500 | 0.90671800  |
| C | -9.88278300  | 0.46027000  | 0.26860000  |
| H | -8.68911900  | -1.29884800 | 0.79807600  |
| H | -8.69207000  | 0.03049200  | 1.97860000  |
| O | -9.93944800  | 1.69255700  | 0.16043400  |
| N | -7.40192200  | 5.11004600  | 0.30180200  |
| H | -7.25770500  | 6.11549500  | 0.22711800  |
| C | -8.63394300  | 4.62326500  | 0.90149900  |
| C | -9.85261300  | 5.29691100  | 0.26338000  |
| H | -8.65894800  | 3.53779300  | 0.79285700  |
| H | -8.66189900  | 4.86713200  | 1.97338100  |
| O | -9.90927700  | 6.52919800  | 0.15521500  |
| N | -10.90010900 | -5.21794600 | -0.11893000 |
| H | -10.75617300 | -6.22356800 | -0.04604800 |
| C | -12.14287800 | -4.72963500 | -0.69473000 |
| H | -12.31050300 | -3.70375500 | -0.35981000 |
| H | -12.11056100 | -4.73335700 | -1.79225100 |
| N | -10.86993800 | -0.38130500 | -0.12414900 |
| H | -10.72600200 | -1.38692700 | -0.05126800 |
| C | -12.11270700 | 0.10700600  | -0.69994900 |
| H | -12.28033200 | 1.13288600  | -0.36502900 |
| H | -12.08039100 | 0.10328400  | -1.79747000 |
| N | -10.83976700 | 4.45533600  | -0.12936900 |
| H | -10.69583100 | 3.44971400  | -0.05648700 |
| C | -12.08253600 | 4.94364600  | -0.70516800 |
| H | -12.25016100 | 5.96952700  | -0.37024800 |
| H | -12.05022000 | 4.93992400  | -1.80269000 |
| H | -12.97748500 | -5.35665600 | -0.36378500 |
| H | -12.94731400 | -0.52001500 | -0.36900500 |
| H | -12.91714300 | 4.31662500  | -0.37422400 |
